# Supplementary material for: Control Analysis of Protein-Protein Interaction Network Reveals Potential Regulatory Targets for MYCN
Source: Front Oncol. 2021 Apr 21;11:633579. doi: 10.3389/fonc.2021.633579 (PMC8096904; doi:10.3389/fonc.2021.633579)
Supplement: Supplementary file 2 [file Table_1.xlsx]

## Sheet: co-expression
cancer	sample	EGFR			AURKA			BANP			FTH1			MAX			MNT			NME1			NMI			SMAD3			YEATS4
		Spearman's Correlation	p_value	q_value	Spearman's Correlation	p_value	q_value	Spearman's Correlation	p_value	q_value	Spearman's Correlation	p_value	q_value	Spearman's Correlation	p_value	q_value	Spearman's Correlation	p_value	q_value	Spearman's Correlation	p_value	q_value	Spearman's Correlation	p_value	q_value	Spearman's Correlation	p_value	q_value	Spearman's Correlation	p_value	q_value
Thymoma (TCGA, PanCancer Atlas)	123	0.456	1.88e-07	5.21e-07	-0.2	0.0294	0.0599	-0.0272	0.769	0.829	-0.199	0.0303	0.0615	-0.0704	0.447	0.55	0.378	2.24e-05	0.0001542	-0.451	2.55e-07	4.197e-06	-0.0221	0.811	0.861	0.524	1e-09	5.72e-08	0.111	0.23	0.324
Kidney Chromophobe (TCGA, PanCancer Atlas)	65	0.431	0.0003368	0.005307	-0.354	0.003795	0.0938	0.0283	0.823	0.936	-0.0891	0.48	0.755	-0.231	0.0636	0.319	-0.255	0.0405	0.259	-0.28	0.0241	0.207	0.283	0.0224	0.2	0.17	0.175	0.485	0.126	0.317	0.631
Diffuse Large B-Cell Lymphoma (TCGA, PanCancer Atlas)	48	0.352	0.0141	0.0407	0.101	0.497	0.671	0.0548	0.711	0.832	-0.218	0.136	0.302	0.039	0.793	0.884	0.358	0.0125	0.0823	-0.364	0.011	0.0773	0.135	0.359	0.552	0.408	0.003974	0.0468	-0.0855	0.563	0.725
Brain Lower Grade Glioma (TCGA, PanCancer Atlas)	514	0.274	2.83e-10	1.29e-09	0.137	0.001913	0.003532	0.26	2.25e-09	9.14e-09	-0.282	7.77e-11	3.78e-10	0.085	0.054	0.0775	0.161	0.0002418	0.0005084	0.29	1.96e-11	1.02e-10	-0.3	3.72e-12	2.11e-11	0.0736	0.0954	0.13	0.361	3.02e-17	3.14e-16
Breast Invasive Carcinoma (TCGA, PanCancer Atlas)	1084	0.259	5.08e-18	1.88e-17	0.159	1.39e-07	7.24e-07	0.122	5.885e-05	0.000185	0.0009814	0.974	0.981	-0.0936	0.002067	0.004665	-0.0423	0.165	0.229	-0.0107	0.725	0.78	0.219	3.43e-13	5.47e-12	-0.091	0.002749	0.006043	-0.107	0.000442	0.001152
Cholangiocarcinoma (TCGA, PanCancer Atlas)	36	0.213	0.213	0.494	-0.234	0.169	0.665	0.001544	0.993	0.998	-0.279	0.0994	0.617	0.169	0.324	0.782	0.0466	0.787	0.951	-0.45	0.005868	0.387	-0.343	0.0405	0.535	-0.0479	0.782	0.949	0.0165	0.924	0.983
Uveal Melanoma (TCGA, PanCancer Atlas)	80	0.21	0.0612	0.355	0.248	0.0263	0.0648	-0.172	0.128	0.221	0.181	0.109	0.195	0.0662	0.56	0.671	-0.489	4.209e-06	5.858e-05	0.241	0.0312	0.0739	0.327	0.003066	0.0119	0.0807	0.477	0.598	0.13	0.25	0.367
Skin Cutaneous Melanoma (TCGA, PanCancer Atlas)	448	0.174	0.0002315	0.0009935	-0.169	0.0003429	0.002484	-0.138	0.003548	0.0156	-0.012	0.801	0.872	-0.0167	0.726	0.821	-0.0672	0.158	0.284	-0.163	0.0005522	0.003595	0.151	0.001388	0.007467	0.111	0.0193	0.0583	-0.0239	0.616	0.736
Prostate Adenocarcinoma (TCGA, PanCancer Atlas)	494	0.136	0.002398	0.004108	0.0547	0.225	0.323	0.1	0.0259	0.0547	0.127	0.004617	0.0125	0.12	0.007696	0.0195	0.11	0.0144	0.0332	-0.224	4.98e-07	4.094e-06	0.238	9.42e-08	9.08e-07	0.324	1.51e-13	6.71e-12	-0.144	0.001339	0.004345
Glioblastoma Multiforme (TCGA, PanCancer Atlas)	592	0.0853	0.284	0.469	0.383	5.75e-07	5.247e-06	0.204	0.009528	0.0244	-0.321	3.451e-05	0.0001876	-0.146	0.0657	0.123	0.0263	0.741	0.815	0.18	0.023	0.0511	-0.407	8.89e-08	1.067e-06	-0.181	0.0219	0.0491	0.147	0.0635	0.12
Adrenocortical Carcinoma (TCGA, PanCancer Atlas)	92	0.0822	0.474	0.827	-0.0872	0.448	0.814	0.367	0.0009433	0.108	-0.182	0.11	0.526	0.331	0.003093	0.15	-0.0346	0.764	0.941	-0.00302	0.979	0.996	0.0517	0.653	0.907	0.259	0.0218	0.302	0.0883	0.442	0.811
Uterine Corpus Endometrial Carcinoma (TCGA, PanCancer Atlas)	529	0.0761	0.0808	0.129	-0.238	2.99e-08	1.12e-06	0.0364	0.405	0.567	-0.187	1.532e-05	0.0002119	-0.0296	0.498	0.651	-0.0706	0.105	0.22	-0.0861	0.0481	0.123	-0.0746	0.0871	0.192	-0.148	0.0006603	0.004432	0.0939	0.0312	0.0888
Mesothelioma (TCGA, PanCancer Atlas)	87	0.0696	0.522	0.684	0.145	0.18	0.614	0.116	0.286	0.71	-0.0987	0.363	0.764	-0.00306	0.978	0.995	0.153	0.157	0.589	0.0108	0.921	0.982	0.063	0.562	0.865	0.321	0.002457	0.149	0.261	0.0147	0.27
Sarcoma (TCGA, PanCancer Atlas)	255	0.0688	0.276	0.395	-0.179	0.004257	0.0202	-0.0221	0.727	0.826	-0.3	1.193e-06	3.074e-05	-0.0572	0.365	0.53	0.106	0.0922	0.202	0.0004565	0.994	0.997	-0.113	0.0718	0.169	0.0154	0.807	0.88	-0.0349	0.581	0.719
Uterine Carcinosarcoma (TCGA, PanCancer Atlas)	57	0.038	0.779	0.929	-0.0862	0.524	0.752	-0.051	0.706	0.865	-0.438	0.0006496	0.0198	-0.21	0.117	0.345	0.0994	0.462	0.707	-0.259	0.0513	0.224	-0.164	0.222	0.486	0.277	0.0372	0.188	-0.0268	0.843	0.933
Kidney Renal Clear Cell Carcinoma (TCGA, PanCancer Atlas)	512	0.0356	0.423	0.496	-0.293	1.57e-11	2.69e-10	0.0585	0.187	0.282	-0.298	6.84e-12	1.24e-10	0.151	0.0006136	0.002163	-0.0641	0.148	0.234	-0.285	5.49e-11	8.63e-10	-0.11	0.0131	0.0306	-0.00894	0.84	0.887	-0.0807	0.0687	0.124
Kidney Renal Papillary Cell Carcinoma (TCGA, PanCancer Atlas)	283	0.0202	0.735	0.796	0.0136	0.82	0.939	-0.027	0.651	0.863	0.0181	0.761	0.915	-0.0232	0.698	0.886	-0.0415	0.487	0.77	-0.0559	0.349	0.672	0.0511	0.392	0.704	0.119	0.0449	0.279	0.0116	0.847	0.947
Pheochromocytoma and Paraganglioma (TCGA, PanCancer Atlas)	178	0.0104	0.981	0.925	-0.122	0.105	0.27	-0.0532	0.48	0.684	-0.0406	0.59	0.765	0.0677	0.369	0.586	0.0596	0.429	0.64	-0.00316	0.967	0.985	0.001203	0.987	0.995	0.0437	0.562	0.745	0.0304	0.687	0.829
Lung Squamous Cell Carcinoma (TCGA, PanCancer Atlas)	487	0.003566	0.938	0.958	-0.0593	0.193	0.298	0.083	0.068	0.13	-0.109	0.016	0.0399	-0.13	0.004285	0.0134	0.001918	0.966	0.977	-0.0994	0.0288	0.0645	0.0678	0.136	0.227	-0.11	0.0152	0.0383	-0.0195	0.669	0.756
Liver Hepatocellular Carcinoma (TCGA, PanCancer Atlas)	372	-0.00695	0.895	0.924	0.092	0.0788	0.187	-0.132	0.0117	0.0467	-0.0335	0.523	0.68	0.0585	0.264	0.436	0.203	9.519e-05	0.001256	-0.00523	0.921	0.955	-0.0761	0.146	0.29	0.078	0.136	0.276	0.0657	0.21	0.372
Ovarian Serous Cystadenocarcinoma (TCGA, PanCancer Atlas)	585	-0.0467	0.42	0.562	0.1	0.0831	0.221	0.0443	0.445	0.642	-0.173	0.002694	0.0201	0.007174	0.902	0.948	-0.0466	0.421	0.621	0.015	0.795	0.888	-0.223	9.866e-05	0.002019	0.213	0.0002083	0.003419	0.188	0.001066	0.0106
Head and Neck Squamous Cell Carcinoma (TCGA, PanCancer Atlas)	523	-0.0508	0.25	0.321	-0.168	0.0001239	0.0003024	0.0421	0.341	0.407	-0.0411	0.352	0.418	-0.0013	0.977	0.981	-0.0937	0.0336	0.0519	-0.311	5.3e-13	4.32e-12	-0.194	9.526e-06	2.762e-05	0.359	4.51e-17	6.37e-16	0.0516	0.242	0.302
Pancreatic Adenocarcinoma (TCGA, PanCancer Atlas)	184	-0.0684	0.366	0.493	-0.0312	0.68	0.886	0.0947	0.21	0.551	-0.331	6.9e-06	0.001567	-0.0836	0.269	0.616	-0.144	0.055	0.293	-0.118	0.117	0.424	0.0166	0.827	0.947	-0.0602	0.426	0.739	-0.0502	0.507	0.792
Colorectal Adenocarcinoma (TCGA, PanCancer Atlas)	526	-0.0803	0.0664	0.109	-0.0706	0.107	0.28	-0.00617	0.888	0.948	-0.288	1.82e-11	1.1e-08	-0.0366	0.404	0.627	-0.028	0.522	0.726	0.009442	0.829	0.917	0.009598	0.827	0.915	0.0275	0.53	0.731	0.137	0.00171	0.0153
Lung Adenocarcinoma (TCGA, PanCancer Atlas)	566	-0.127	0.004096	0.0111	0.0765	0.0842	0.189	0.229	1.73e-07	5.339e-06	-0.263	1.69e-09	1.14e-07	-0.0642	0.147	0.285	0.007828	0.86	0.919	-0.0525	0.237	0.4	-0.179	4.692e-05	0.0005421	-0.111	0.0125	0.045	0.124	0.004928	0.0219
Stomach Adenocarcinoma (TCGA, PanCancer Atlas)	440	-0.146	0.002903	0.0102	0.205	2.678e-05	0.0005261	0.0773	0.117	0.261	-0.117	0.0174	0.0681	-0.153	0.001833	0.013	-0.0616	0.212	0.387	-0.011	0.824	0.903	-0.27	2.6e-08	2.362e-06	0.0471	0.341	0.529	-0.127	0.0101	0.0454
Cervical Squamous Cell Carcinoma (TCGA, PanCancer Atlas)	297	-0.152	0.00924	0.0196	-0.114	0.0518	0.116	-0.0048	0.935	0.958	-0.118	0.0424	0.0994	0.0006505	0.991	0.994	0.0543	0.353	0.494	-0.256	8.763e-06	0.0001202	-0.249	1.627e-05	0.0001997	-0.0222	0.704	0.799	0.102	0.0802	0.164
Thyroid Carcinoma (TCGA, PanCancer Atlas)	500	-0.165	0.0002161	0.0003918	0.195	1.174e-05	4.925e-05	0.261	3.27e-09	2.77e-08	-0.241	5.31e-08	3.54e-07	-0.185	3.235e-05	0.0001238	-0.209	2.69e-06	1.294e-05	0.0775	0.0839	0.137	-0.116	0.009353	0.0202	0.0622	0.166	0.243	-0.0847	0.0588	0.101
Bladder Urothelial Carcinoma (TCGA, PanCancer Atlas)	411	-0.206	2.925e-05	9.57e-05	-0.121	0.0142	0.0323	0.236	1.542e-06	9.75e-06	-0.129	0.00919	0.0221	-0.331	7e-12	1.32e-10	0.135	0.006501	0.0164	0.0299	0.547	0.647	-0.359	8.49e-14	2.33e-12	-0.0713	0.151	0.236	0.0163	0.743	0.811
Acute Myeloid Leukemia (TCGA, PanCancer Atlas)	200	-0.212	0.00501	0.0258	-0.363	9.44e-07	1.268e-05	0.293	9.02e-05	0.0005565	-0.166	0.029	0.0663	0.376	3.41e-07	5.482e-06	-0.0109	0.887	0.923	0.055	0.472	0.588	0.101	0.185	0.289	-0.209	0.005739	0.0178	0.04	0.602	0.704
Esophageal Adenocarcinoma (TCGA, PanCancer Atlas)	182	-0.229	0.001933	0.00556	0.0545	0.466	0.619	-0.0067	0.929	0.959	-0.0812	0.277	0.433	-0.231	0.001793	0.0104	-0.12	0.109	0.222	-0.0826	0.269	0.424	-0.199	0.007208	0.0296	-0.0769	0.303	0.46	-0.0914	0.221	0.368
Testicular Germ Cell Tumors (TCGA, PanCancer Atlas)	149	-0.343	1.805e-05	6.467e-05	0.545	6.67e-13	7.5e-12	0.323	5.757e-05	0.0001424	-0.287	0.0003872	0.0008357	-0.403	3.36e-07	1.196e-06	0.0101	0.902	0.921	0.371	3.101e-06	9.396e-06	0.0247	0.765	0.808	-0.317	8.255e-05	0.0001988	0.49	2.27e-10	1.46e-09

## Sheet: Grade & Radiation
	G2	G3	statistical test(grade)	p-Value(grade)	q-Value(grade)	radiation therapy_yes	radiation therapy_no	statistical test(radiation)	p-Value(grade)	q-Value(grade)
EGFR	5	49	Chi-squared Test	<10-10	<10-10	46	4	Chi-squared Test	1.92e-09	7.49e-09
AURKA	1	1	Chi-squared Test	3.208e-06	1.385e-05	2	0	Chi-squared Test	1.218e-05	4.757e-05
BANP	1	1	Chi-squared Test	3.208e-06	1.315e-05	2	0	Chi-squared Test	1.218e-05	4.343e-05
FTH1	0	2	Chi-squared Test	1.255e-06	4.902e-06	2	0	Chi-squared Test	1.218e-05	4.343e-05
MAX	3	1	Chi-squared Test	1.839e-06	7.936e-06	2	2	Chi-squared Test	2.064e-05	7.694e-05
MNT	2	0	Chi-squared Test	1.116e-06	5.082e-06	1	1	Chi-squared Test	2.177e-05	8.499e-05
NME1	0	2	Chi-squared Test	1.255e-06	4.679e-06	2	0	Chi-squared Test	1.218e-05	4.343e-05
NMI	1	0	Chi-squared Test	1.891e-06	8.16e-06	1	0	Chi-squared Test	1.672e-05	6.528e-05
SMAD3	2	2	Chi-squared Test	3.208e-06	1.385e-05	1	1	Chi-squared Test	2.177e-05	7.76e-05
YEATS4	0	3	Chi-squared Test	1.255e-06	4.679e-06	2	0	Chi-squared Test	1.218e-05	4.343e-05

## Sheet: all sample
#Patient Identifier	Sample Identifier	Oncotree Code	Cancer Type	Cancer Type Detailed	Tumor Type	Neoplasm Histologic Grade	Tissue Prospective Collection Indicator	Tissue Retrospective Collection Indicator	Tissue Source Site	Tumor Disease Anatomic Site	Aneuploidy Score	1p Status	1q Status	2p Status	2q Status	3p Status	3q Status	4p Status	4q Status	5p Status	5q Status	6p Status	6q Status	7p Status	7q Status	8p Status	8q Status	9p Status	9q Status	10p Status	10q Status	11p Status	11q Status	12p Status	12q Status	13 (13q) Status	14 (14q) Status	15 (15q) Status	16p Status	16q Status	17p Status	17q Status	18p Status	18q Status	19p Status	19q Status	20p Status	20q Status	21 (21q) Status
#Identifier to uniquely specify a patient.	A unique sample identifier.	Oncotree Code	Cancer Type	Cancer Type Detailed	Tumor Type	Numeric value to express the degree of abnormality of cancer cells, a measure of differentiation and aggressiveness.	Tissue prospective collection indicator.	Tissue retrospective collection indicator.	A Tissue Source Site collects samples (tissue, cell, or blood) and cliincal metadata which are then sent to tha Biospecimen Core Resource.	Text term that describes the anatomic site of the tumor or disease.	Aneuploidy Score	Chromosome Arm-Calls: 1p	Chromosome Arm-Calls: 1q	Chromosome Arm-Calls: 2p	Chromosome Arm-Calls: 2q	Chromosome Arm-Calls: 3p	Chromosome Arm-Calls: 3q	Chromosome Arm-Calls: 4p	Chromosome Arm-Calls: 4q	Chromosome Arm-Calls: 5p	Chromosome Arm-Calls: 5q	Chromosome Arm-Calls: 6p	Chromosome Arm-Calls: 6q	Chromosome Arm-Calls: 7p	Chromosome Arm-Calls: 7q	Chromosome Arm-Calls: 8p	Chromosome Arm-Calls: 8q	Chromosome Arm-Calls: 9p	Chromosome Arm-Calls: 9q	Chromosome Arm-Calls: 10p	Chromosome Arm-Calls: 10q	Chromosome Arm-Calls: 11p	Chromosome Arm-Calls: 11q	Chromosome Arm-Calls: 12p	Chromosome Arm-Calls: 12q	Chromosome Arm-Calls: 13 (13q)	Chromosome Arm-Calls: 14 (14q)	Chromosome Arm-Calls: 15 (15q)	Chromosome Arm-Calls: 16p	Chromosome Arm-Calls: 16q	Chromosome Arm-Calls: 17p	Chromosome Arm-Calls: 17q	Chromosome Arm-Calls: 18p	Chromosome Arm-Calls: 18q	Chromosome Arm-Calls: 19p	Chromosome Arm-Calls: 19q	Chromosome Arm-Calls: 20p	Chromosome Arm-Calls: 20q	Chromosome Arm-Calls: 21 (21q)
#STRING	STRING	STRING	STRING	STRING	STRING	STRING	STRING	STRING	STRING	STRING	NUMBER	STRING	STRING	STRING	STRING	STRING	STRING	STRING	STRING	STRING	STRING	STRING	STRING	STRING	STRING	STRING	STRING	STRING	STRING	STRING	STRING	STRING	STRING	STRING	STRING	STRING	STRING	STRING	STRING	STRING	STRING	STRING	STRING	STRING	STRING	STRING	STRING	STRING	STRING
#1	1	1	1	1	1	1	1	1	1	1	1	1	1	1	1	1	1	1	1	1	1	1	1	1	1	1	1	1	1	1	1	1	1	1	1	1	1	1	1	1	1	1	1	1	1	1	1	1	1
PATIENT_ID	SAMPLE_ID	ONCOTREE_CODE	CANCER_TYPE	CANCER_TYPE_DETAILED	TUMOR_TYPE	GRADE	TISSUE_PROSPECTIVE_COLLECTION_INDICATOR	TISSUE_RETROSPECTIVE_COLLECTION_INDICATOR	TISSUE_SOURCE_SITE	TUMOR_TISSUE_SITE	ANEUPLOIDY_SCORE	STATUS_1P	STATUS_1Q	STATUS_2P	STATUS_2Q	STATUS_3P	STATUS_3Q	STATUS_4P	STATUS_4Q	STATUS_5P	STATUS_5Q	STATUS_6P	STATUS_6Q	STATUS_7P	STATUS_7Q	STATUS_8P	STATUS_8Q	STATUS_9P	STATUS_9Q	STATUS_10P	STATUS_10Q	STATUS_11P	STATUS_11Q	STATUS_12P	STATUS_12Q	STATUS_13_13Q	STATUS_14_14Q	STATUS_15_15Q	STATUS_16P	STATUS_16Q	STATUS_17P	STATUS_17Q	STATUS_18P	STATUS_18Q	STATUS_19P	STATUS_19Q	STATUS_20P	STATUS_20Q	STATUS_21_21Q
TCGA-CS-4938	TCGA-CS-4938-01	DIFG	Diffuse Glioma	Astrocytoma	Astrocytoma	G2	No	Yes	CS	CNS	1	Not Called	Not Called	Not Called	Not Called	Not Called	Not Called	Not Called	Not Called	Not Called	Not Called	Not Called	Not Called	Not Called	Not Called	Not Called	Not Called	Not Called	Not Called	Not Called	Not Called	Not Called	Not Called	Not Called	Not Called	Not Called		Not Called	Not Called	Not Called	Not Called	Not Called	Gained	Not Called	Not Called	Not Called	Not Called		Not Called
TCGA-CS-4941	TCGA-CS-4941-01	DIFG	Diffuse Glioma	Astrocytoma	Astrocytoma	G3	No	Yes	CS	CNS	7	Gained	Gained	Not Called	Not Called	Not Called	Not Called	Not Called	Not Called	Not Called	Not Called	Not Called	Not Called	Gained	Gained	Not Called	Not Called	Not Called	Not Called	Lost	Lost	Not Called	Not Called	Not Called		Not Called	Lost	Not Called	Not Called	Not Called	Not Called	Not Called	Not Called	Not Called	Not Called	Not Called	Not Called	Not Called	Not Called
TCGA-CS-4942	TCGA-CS-4942-01	DIFG	Diffuse Glioma	Astrocytoma	Astrocytoma	G3	No	Yes	CS	CNS	2	Not Called	Not Called	Not Called	Not Called	Not Called	Not Called	Not Called	Not Called	Not Called	Not Called		Not Called	Gained	Gained	Not Called	Not Called	Not Called	Not Called	Not Called	Not Called	Not Called	Not Called	Not Called	Not Called	Not Called		Not Called	Not Called	Not Called	Not Called	Not Called	Not Called	Not Called	Not Called		Not Called	Not Called	Not Called
TCGA-CS-4943	TCGA-CS-4943-01	DIFG	Diffuse Glioma	Astrocytoma	Astrocytoma	G3	No	Yes	CS	CNS	5	Not Called	Not Called	Not Called	Not Called	Not Called	Not Called		Lost		Not Called	Not Called	Not Called	Not Called	Not Called				Not Called		Not Called		Not Called	Gained	Not Called	Not Called	Not Called	Not Called	Not Called	Not Called	Not Called	Not Called	Lost	Gained	Not Called	Not Called	Not Called	Not Called	Not Called
TCGA-CS-4944	TCGA-CS-4944-01	DIFG	Diffuse Glioma	Astrocytoma	Astrocytoma	G2	No	Yes	CS	CNS	1		Not Called	Not Called	Not Called	Not Called	Not Called	Not Called	Not Called	Not Called	Not Called	Not Called	Lost	Not Called	Not Called	Not Called	Not Called	Not Called	Not Called	Not Called	Not Called	Not Called	Not Called	Not Called	Not Called	Not Called	Not Called	Not Called	Not Called	Not Called	Not Called	Not Called	Not Called	Not Called	Not Called		Not Called	Not Called	Not Called
TCGA-CS-5390	TCGA-CS-5390-01	ODG	Diffuse Glioma	Oligodendroglioma	Oligodendroglioma	G2	No	Yes	CS	CNS	2	Lost	Not Called	Not Called	Not Called	Not Called	Not Called	Not Called	Not Called	Not Called	Not Called	Not Called	Not Called	Not Called	Not Called	Not Called	Not Called	Not Called	Not Called	Not Called	Not Called	Not Called	Not Called	Not Called	Not Called	Not Called	Not Called	Not Called	Not Called	Not Called	Not Called	Not Called	Not Called	Not Called	Not Called	Lost	Not Called	Not Called	Not Called
TCGA-CS-5393	TCGA-CS-5393-01	DIFG	Diffuse Glioma	Astrocytoma	Astrocytoma	G3	No	Yes	CS	CNS	0	Not Called	Not Called	Not Called	Not Called	Not Called	Not Called	Not Called	Not Called	Not Called	Not Called	Not Called	Not Called		Not Called	Not Called			Not Called		Not Called	Not Called	Not Called	Not Called	Not Called	Not Called	Not Called	Not Called	Not Called	Not Called	Not Called	Not Called		Not Called	Not Called	Not Called	Not Called	Not Called	Not Called
TCGA-CS-5394	TCGA-CS-5394-01	DIFG	Diffuse Glioma	Astrocytoma	Astrocytoma	G3	No	Yes	CS	CNS	1	Lost	Not Called	Not Called	Not Called	Not Called	Not Called	Not Called	Not Called	Not Called	Not Called	Not Called	Not Called	Not Called	Not Called	Not Called	Not Called	Not Called	Not Called	Not Called	Not Called	Not Called	Not Called	Not Called	Not Called	Not Called	Not Called	Not Called	Not Called	Not Called	Not Called	Not Called	Not Called	Not Called	Not Called		Not Called	Not Called	Not Called
TCGA-CS-5395	TCGA-CS-5395-01	ODG	Diffuse Glioma	Oligodendroglioma	Oligodendroglioma	G2	No	Yes	CS	CNS	8	Not Called		Not Called	Not Called	Not Called		Not Called	Not Called	Not Called	Not Called	Not Called	Not Called	Gained	Gained	Not Called	Not Called		Not Called	Lost	Lost	Not Called	Not Called	Not Called	Not Called	Not Called	Not Called	Not Called	Not Called	Not Called	Not Called	Not Called	Not Called	Not Called	Gained	Gained	Gained	Gained	Not Called
TCGA-CS-5396	TCGA-CS-5396-01	ODG	Diffuse Glioma	Oligodendroglioma	Oligodendroglioma	G3	No	Yes	CS	CNS	6	Lost	Not Called	Not Called	Not Called	Not Called	Not Called	Not Called	Not Called	Not Called	Not Called	Not Called	Not Called	Not Called	Not Called	Not Called	Not Called	Not Called	Not Called	Not Called	Not Called	Gained	Gained	Not Called	Not Called	Not Called	Not Called	Not Called	Not Called	Not Called	Not Called	Not Called	Lost	Lost	Not Called	Lost	Not Called	Not Called	Not Called
TCGA-CS-5397	TCGA-CS-5397-01	DIFG	Diffuse Glioma	Astrocytoma	Astrocytoma	G3	No	Yes	CS	CNS	9	Not Called	Not Called	Not Called	Not Called	Not Called	Not Called	Not Called	Not Called	Not Called	Not Called	Lost	Lost		Gained	Not Called	Not Called	Lost	Gained	Lost	Lost	Not Called	Not Called	Not Called	Not Called	Not Called	Not Called			Not Called	Not Called		Not Called	Not Called	Not Called	Not Called	Gained	Gained	Not Called
TCGA-CS-6186	TCGA-CS-6186-01	OAST	Diffuse Glioma	Oligoastrocytoma	Oligoastrocytoma	G3	No	Yes	CS	CNS	7	Not Called	Not Called	Not Called	Not Called	Not Called	Not Called	Not Called	Not Called	Not Called	Not Called	Not Called	Not Called	Gained	Gained	Not Called	Not Called	Not Called	Not Called	Lost	Lost	Not Called	Not Called	Not Called	Not Called	Not Called	Not Called	Not Called	Not Called	Not Called	Not Called	Not Called	Not Called	Not Called	Gained	Gained		Gained	Not Called
TCGA-CS-6188	TCGA-CS-6188-01	DIFG	Diffuse Glioma	Astrocytoma	Astrocytoma	G3	No	Yes	CS	CNS	6	Not Called	Not Called	Not Called	Not Called	Not Called	Not Called	Not Called	Not Called	Not Called	Not Called	Not Called	Not Called		Gained	Not Called	Not Called		Not Called	Lost	Lost	Not Called	Not Called	Not Called	Not Called	Not Called	Not Called	Not Called	Not Called	Not Called	Not Called	Not Called	Not Called	Not Called	Gained		Gained	Gained	Not Called
TCGA-CS-6290	TCGA-CS-6290-01	DIFG	Diffuse Glioma	Astrocytoma	Astrocytoma	G3	No	Yes	CS	CNS	0	Not Called	Not Called	Not Called	Not Called	Not Called	Not Called	Not Called	Not Called	Not Called	Not Called	Not Called	Not Called	Not Called	Not Called	Not Called		Not Called	Not Called	Not Called	Not Called	Not Called	Not Called	Not Called	Not Called	Not Called	Not Called	Not Called	Not Called	Not Called	Not Called	Not Called	Not Called	Not Called	Not Called	Not Called	Not Called	Not Called	Not Called
TCGA-CS-6665	TCGA-CS-6665-01	DIFG	Diffuse Glioma	Astrocytoma	Astrocytoma	G3	No	Yes	CS	CNS	19	Gained	Gained	Not Called	Not Called	Not Called	Not Called	Gained		Not Called			Gained	Gained	Gained	Gained	Gained	Gained	Gained	Gained		Lost	Not Called	Lost	Not Called		Gained	Not Called		Not Called	Gained	Gained	Not Called	Not Called	Not Called	Not Called	Gained	Gained
TCGA-CS-6666	TCGA-CS-6666-01	DIFG	Diffuse Glioma	Astrocytoma	Astrocytoma	G3	No	Yes	CS	CNS	8	Not Called	Not Called	Not Called			Lost	Gained		Not Called		Not Called	Not Called	Not Called	Not Called	Gained	Gained	Lost	Lost		Not Called	Gained		Not Called	Not Called	Lost	Not Called		Not Called	Not Called	Not Called	Not Called	Not Called	Not Called	Not Called	Not Called	Not Called	Not Called	Not Called
TCGA-CS-6667	TCGA-CS-6667-01	DIFG	Diffuse Glioma	Astrocytoma	Astrocytoma	G2	No	Yes	CS	CNS	1	Not Called	Not Called	Not Called	Not Called	Not Called	Not Called	Not Called	Not Called	Not Called	Not Called	Not Called	Not Called	Not Called	Not Called	Not Called	Not Called	Not Called	Not Called	Gained	Not Called	Not Called	Not Called	Not Called	Not Called	Not Called	Not Called	Not Called	Not Called	Not Called	Not Called	Not Called	Not Called	Not Called	Not Called	Not Called	Not Called	Not Called	Not Called
TCGA-CS-6668	TCGA-CS-6668-01	ODG	Diffuse Glioma	Oligodendroglioma	Oligodendroglioma	G2	No	Yes	CS	CNS	2	Lost	Not Called	Not Called	Not Called		Not Called	Not Called	Not Called	Not Called	Not Called	Not Called	Not Called	Not Called	Not Called	Not Called	Not Called	Not Called	Not Called	Not Called	Not Called	Not Called	Not Called	Not Called	Not Called	Not Called		Not Called	Not Called	Not Called	Not Called	Not Called	Not Called	Not Called	Not Called	Lost	Not Called	Not Called	Not Called
TCGA-CS-6669	TCGA-CS-6669-01	ODG	Diffuse Glioma	Oligodendroglioma	Oligodendroglioma	G2	No	Yes	CS	CNS	0	Not Called	Not Called	Not Called	Not Called	Not Called	Not Called	Not Called	Not Called	Not Called	Not Called	Not Called	Not Called	Not Called	Not Called	Not Called	Not Called	Not Called	Not Called	Not Called	Not Called	Not Called	Not Called	Not Called	Not Called	Not Called	Not Called	Not Called	Not Called	Not Called	Not Called	Not Called	Not Called	Not Called	Not Called	Not Called	Not Called	Not Called	Not Called
TCGA-CS-6670	TCGA-CS-6670-01	ODG	Diffuse Glioma	Oligodendroglioma	Oligodendroglioma	G3	NA	NA	CS	CNS	2	Lost	Not Called	Not Called	Not Called	Not Called	Not Called	Not Called	Not Called	Not Called	Not Called	Not Called	Not Called	Not Called	Not Called	Not Called	Not Called	Not Called	Not Called	Not Called	Not Called	Not Called	Not Called	Not Called	Not Called	Not Called	Not Called	Not Called	Not Called	Not Called	Not Called	Not Called	Not Called	Not Called	Not Called	Lost	Not Called	Not Called	Not Called
TCGA-DB-5270	TCGA-DB-5270-01	OAST	Diffuse Glioma	Oligoastrocytoma	Oligoastrocytoma	G3	No	Yes	DB	CNS	2	Not Called	Not Called	Not Called	Not Called	Not Called	Not Called	Not Called	Not Called	Not Called	Not Called	Not Called	Not Called	Gained	Gained	Not Called	Not Called	Not Called	Not Called	Not Called	Not Called	Not Called	Not Called	Not Called	Not Called	Not Called	Not Called	Not Called	Not Called	Not Called	Not Called	Not Called	Not Called	Not Called	Not Called		Not Called	Not Called	Not Called
TCGA-DB-5273	TCGA-DB-5273-01	DIFG	Diffuse Glioma	Astrocytoma	Astrocytoma	G3	No	Yes	DB	CNS	1	Not Called	Not Called	Not Called	Not Called	Not Called	Not Called	Not Called	Not Called	Not Called	Not Called	Not Called	Not Called	Not Called	Not Called	Not Called	Not Called	Not Called	Not Called	Not Called	Not Called	Not Called	Not Called	Gained	Not Called	Not Called	Not Called	Not Called	Not Called	Not Called	Not Called	Not Called	Not Called	Not Called	Not Called		Not Called	Not Called	Not Called
TCGA-DB-5274	TCGA-DB-5274-01	OAST	Diffuse Glioma	Oligoastrocytoma	Oligoastrocytoma	G3	No	Yes	DB	CNS	2	Lost	Not Called	Not Called	Not Called	Not Called	Not Called	Not Called	Not Called	Not Called	Not Called	Not Called	Not Called	Not Called	Not Called	Not Called	Not Called	Not Called	Not Called	Not Called	Not Called	Not Called	Not Called	Not Called	Not Called	Not Called	Not Called	Not Called	Not Called	Not Called	Not Called	Not Called	Not Called	Not Called	Not Called	Lost	Not Called	Not Called	Not Called
TCGA-DB-5275	TCGA-DB-5275-01	OAST	Diffuse Glioma	Oligoastrocytoma	Oligoastrocytoma	G3	No	Yes	DB	CNS	3		Not Called	Not Called	Not Called			Not Called	Lost	Lost	Not Called	Not Called	Not Called	Not Called	Not Called	Not Called	Not Called	Not Called	Not Called	Not Called	Not Called	Not Called	Not Called	Gained	Not Called		Not Called	Not Called	Not Called	Not Called	Not Called	Not Called	Not Called	Not Called	Not Called		Not Called	Not Called	Not Called
TCGA-DB-5276	TCGA-DB-5276-01	OAST	Diffuse Glioma	Oligoastrocytoma	Oligoastrocytoma	G3	No	Yes	DB	CNS	0	Not Called	Not Called	Not Called	Not Called	Not Called	Not Called	Not Called	Not Called	Not Called	Not Called	Not Called	Not Called	Not Called	Not Called	Not Called	Not Called	Not Called	Not Called	Not Called	Not Called	Not Called	Not Called	Not Called	Not Called	Not Called	Not Called	Not Called	Not Called	Not Called	Not Called	Not Called	Not Called	Not Called	Not Called	Not Called	Not Called	Not Called	Not Called
TCGA-DB-5277	TCGA-DB-5277-01	DIFG	Diffuse Glioma	Astrocytoma	Astrocytoma	G3	No	Yes	DB	CNS	9	Not Called			Not Called		Lost	Not Called	Lost	Not Called		Not Called	Not Called	Not Called	Not Called	Lost		Lost	Not Called	Gained		Lost		Gained			Not Called		Not Called	Not Called	Not Called	Not Called	Gained	Not Called		Not Called	Not Called	Not Called	Not Called
TCGA-DB-5278	TCGA-DB-5278-01	ODG	Diffuse Glioma	Oligodendroglioma	Oligodendroglioma	G2	No	Yes	DB	CNS	2	Lost	Not Called	Not Called	Not Called	Not Called	Not Called	Not Called	Not Called	Not Called	Not Called	Not Called	Not Called	Not Called	Not Called	Not Called	Not Called	Not Called	Not Called	Not Called	Not Called	Not Called	Not Called	Not Called	Not Called	Not Called	Not Called	Not Called	Not Called	Not Called	Not Called	Not Called	Not Called	Not Called	Not Called	Lost	Not Called	Not Called	Not Called
TCGA-DB-5279	TCGA-DB-5279-01	ODG	Diffuse Glioma	Oligodendroglioma	Oligodendroglioma	G2	No	Yes	DB	CNS	15	Lost	Not Called	Not Called	Not Called	Not Called	Not Called	Lost	Lost	Not Called	Not Called	Not Called	Not Called	Not Called	Not Called	Not Called	Not Called	Lost	Lost	Lost	Lost	Not Called	Not Called	Lost	Lost	Not Called	Lost	Lost	Not Called	Not Called	Not Called	Not Called	Lost	Lost	Not Called	Lost	Not Called	Not Called	Lost
TCGA-DB-5280	TCGA-DB-5280-01	OAST	Diffuse Glioma	Oligoastrocytoma	Oligoastrocytoma	G2	No	Yes	DB	CNS	0	Not Called	Not Called	Not Called	Not Called	Not Called	Not Called	Not Called	Not Called	Not Called	Not Called	Not Called		Not Called	Not Called	Not Called	Not Called	Not Called	Not Called	Not Called	Not Called	Not Called	Not Called	Not Called	Not Called	Not Called	Not Called	Not Called	Not Called	Not Called	Not Called	Not Called	Not Called	Not Called	Not Called	Not Called	Not Called	Not Called	Not Called
TCGA-DB-5281	TCGA-DB-5281-01	OAST	Diffuse Glioma	Oligoastrocytoma	Oligoastrocytoma	G3	No	Yes	DB	CNS	6		Not Called	Not Called	Not Called	Not Called	Lost	Not Called		Lost	Lost	Not Called	Not Called	Not Called		Not Called		Lost	Not Called	Not Called	Not Called	Not Called	Not Called		Not Called	Not Called	Not Called		Lost	Lost	Not Called	Not Called	Not Called	Not Called	Not Called	Not Called	Not Called	Not Called	Not Called
TCGA-DB-A4X9	TCGA-DB-A4X9-01	OAST	Diffuse Glioma	Oligoastrocytoma	Oligoastrocytoma	G2	Yes	No	DB	CNS	4	Not Called	Not Called	Not Called	Not Called	Not Called	Not Called	Not Called	Not Called	Not Called	Not Called	Not Called	Not Called	Gained	Gained	Not Called	Not Called	Not Called	Not Called	Not Called	Not Called	Gained	Gained	Not Called	Not Called	Not Called	Not Called	Not Called	Not Called	Not Called	Not Called	Not Called	Not Called	Not Called	Not Called	Not Called	Not Called	Not Called	Not Called
TCGA-DB-A4XA	TCGA-DB-A4XA-01	OAST	Diffuse Glioma	Oligoastrocytoma	Oligoastrocytoma	G2	Yes	No	DB	CNS	2	Lost	Not Called	Not Called	Not Called	Not Called	Not Called	Not Called	Not Called	Not Called	Not Called	Not Called	Not Called	Not Called	Not Called	Not Called	Not Called	Not Called	Not Called	Not Called	Not Called	Not Called	Not Called	Not Called	Not Called	Not Called	Not Called	Not Called	Not Called	Not Called	Not Called	Not Called	Not Called	Not Called	Not Called	Lost	Not Called	Not Called	Not Called
TCGA-DB-A4XB	TCGA-DB-A4XB-01	DIFG	Diffuse Glioma	Astrocytoma	Astrocytoma	G3	Yes	No	DB	CNS	0	Not Called	Not Called	Not Called	Not Called	Not Called	Not Called	Not Called	Not Called	Not Called	Not Called	Not Called	Not Called	Not Called	Not Called	Not Called			Not Called	Not Called	Not Called	Not Called	Not Called	Not Called	Not Called	Not Called	Not Called	Not Called	Not Called	Not Called	Not Called		Not Called	Not Called	Not Called		Not Called	Not Called	Not Called
TCGA-DB-A4XC	TCGA-DB-A4XC-01	OAST	Diffuse Glioma	Oligoastrocytoma	Oligoastrocytoma	G2	Yes	No	DB	CNS	0	Not Called	Not Called	Not Called	Not Called	Not Called	Not Called	Not Called	Not Called	Not Called	Not Called	Not Called	Not Called	Not Called	Not Called	Not Called	Not Called		Not Called	Not Called	Not Called	Not Called			Not Called	Not Called	Not Called	Not Called	Not Called	Not Called	Not Called	Not Called	Not Called	Not Called	Not Called	Not Called	Not Called	Not Called	Not Called
TCGA-DB-A4XD	TCGA-DB-A4XD-01	DIFG	Diffuse Glioma	Astrocytoma	Astrocytoma	G3	Yes	No	DB	CNS	0	Not Called	Not Called	Not Called	Not Called	Not Called	Not Called	Not Called	Not Called	Not Called	Not Called	Not Called	Not Called	Not Called	Not Called	Not Called		Not Called	Not Called	Not Called	Not Called	Not Called	Not Called	Not Called	Not Called	Not Called	Not Called	Not Called	Not Called	Not Called	Not Called	Not Called	Not Called	Not Called	Not Called	Not Called	Not Called	Not Called	Not Called
TCGA-DB-A4XE	TCGA-DB-A4XE-01	OAST	Diffuse Glioma	Oligoastrocytoma	Oligoastrocytoma	G3	Yes	No	DB	CNS	5	Not Called	Not Called	Not Called	Not Called	Not Called	Not Called	Not Called	Not Called	Not Called	Not Called	Not Called	Not Called	Gained	Gained	Not Called	Gained	Gained	Gained		Not Called	Not Called	Not Called	Not Called	Not Called	Not Called	Not Called	Not Called	Not Called	Not Called	Not Called	Not Called	Not Called	Not Called	Not Called	Not Called	Not Called	Not Called	Not Called
TCGA-DB-A4XF	TCGA-DB-A4XF-01	DIFG	Diffuse Glioma	Astrocytoma	Astrocytoma	G3	Yes	No	DB	CNS	0	Not Called	Not Called	Not Called	Not Called	Not Called	Not Called	Not Called	Not Called	Not Called	Not Called	Not Called		Not Called	Not Called	Not Called	Not Called	Not Called	Not Called	Not Called		Not Called	Not Called	Not Called	Not Called	Not Called	Not Called	Not Called	Not Called	Not Called	Not Called		Not Called	Not Called	Not Called	Not Called	Not Called	Not Called	Not Called
TCGA-DB-A4XG	TCGA-DB-A4XG-01	ODG	Diffuse Glioma	Oligodendroglioma	Oligodendroglioma	G3	Yes	No	DB	CNS	4	Lost	Not Called	Not Called	Not Called	Not Called	Not Called	Not Called	Not Called	Not Called	Not Called	Not Called	Not Called	Not Called	Not Called	Not Called	Not Called	Not Called		Not Called	Not Called	Not Called	Not Called	Not Called	Not Called	Not Called	Not Called	Not Called	Not Called	Not Called	Not Called	Not Called	Lost	Lost	Not Called	Lost	Not Called	Not Called	Not Called
TCGA-DB-A4XH	TCGA-DB-A4XH-01	OAST	Diffuse Glioma	Oligoastrocytoma	Oligoastrocytoma	G2	Yes	No	DB	CNS	2	Lost	Not Called	Not Called	Not Called	Not Called	Not Called	Not Called	Not Called	Not Called	Not Called	Not Called	Not Called	Not Called	Not Called	Not Called	Not Called	Not Called	Not Called	Not Called	Not Called	Not Called	Not Called	Not Called	Not Called	Not Called	Not Called	Not Called	Not Called	Not Called	Not Called	Not Called	Not Called	Not Called	Not Called	Lost	Not Called	Not Called	Not Called
TCGA-DB-A64L	TCGA-DB-A64L-01	ODG	Diffuse Glioma	Oligodendroglioma	Oligodendroglioma	G2	Yes	No	DB	CNS	13	Lost	Gained	Not Called	Not Called	Not Called	Not Called	Not Called	Not Called	Not Called	Not Called		Not Called	Not Called	Not Called	Not Called	Not Called	Lost	Lost	Lost	Lost	Gained	Gained	Not Called	Not Called	Not Called	Lost	Not Called	Not Called	Not Called	Not Called	Not Called	Lost	Lost	Not Called	Lost	Not Called	Not Called	Not Called
TCGA-DB-A64O	TCGA-DB-A64O-01	OAST	Diffuse Glioma	Oligoastrocytoma	Oligoastrocytoma	G2	Yes	No	DB	CNS	8	Not Called	Not Called	Not Called	Not Called	Not Called	Not Called	Not Called	Not Called	Not Called	Not Called	Lost	Lost	Gained	Gained	Not Called	Not Called	Not Called	Not Called	Lost	Lost	Not Called	Not Called	Not Called	Not Called	Not Called	Lost	Not Called	Not Called	Not Called	Not Called	Not Called	Not Called	Not Called	Not Called	Not Called	Not Called	Not Called	Not Called
TCGA-DB-A64P	TCGA-DB-A64P-01	ODG	Diffuse Glioma	Oligodendroglioma	Oligodendroglioma	G3	Yes	No	DB	CNS	3	Lost	Not Called	Not Called	Not Called	Not Called	Not Called	Not Called	Not Called	Not Called	Not Called	Not Called	Not Called	Not Called	Not Called	Not Called	Not Called	Not Called	Not Called	Not Called	Not Called	Not Called	Not Called	Gained	Not Called	Not Called	Not Called	Not Called	Not Called	Not Called	Not Called	Not Called	Not Called	Not Called	Not Called	Lost	Not Called	Not Called	Not Called
TCGA-DB-A64Q	TCGA-DB-A64Q-01	OAST	Diffuse Glioma	Oligoastrocytoma	Oligoastrocytoma	G2	Yes	No	DB	CNS	3	Lost	Not Called	Not Called	Not Called	Not Called	Not Called	Not Called	Not Called	Not Called	Not Called	Not Called	Not Called	Not Called	Not Called	Not Called	Not Called		Not Called	Not Called	Not Called	Not Called		Not Called	Not Called	Not Called	Not Called	Not Called	Not Called	Not Called	Not Called	Gained	Not Called	Not Called	Not Called	Lost	Not Called	Not Called	Not Called
TCGA-DB-A64R	TCGA-DB-A64R-01	ODG	Diffuse Glioma	Oligodendroglioma	Oligodendroglioma	G2	Yes	No	DB	CNS	2	Lost	Not Called	Not Called	Not Called	Not Called	Not Called	Not Called	Not Called	Not Called	Not Called	Not Called	Not Called	Not Called	Not Called	Not Called	Not Called	Not Called	Not Called	Not Called	Not Called	Not Called	Not Called	Not Called	Not Called	Not Called	Not Called	Not Called	Not Called	Not Called	Not Called	Not Called	Not Called	Not Called	Not Called	Lost	Not Called	Not Called	Not Called
TCGA-DB-A64S	TCGA-DB-A64S-01	OAST	Diffuse Glioma	Oligoastrocytoma	Oligoastrocytoma	G2	Yes	No	DB	CNS	0	Not Called	Not Called	Not Called	Not Called	Not Called	Not Called	Not Called	Not Called	Not Called	Not Called	Not Called	Not Called	Not Called	Not Called	Not Called	Not Called	Not Called	Not Called	Not Called	Not Called	Not Called	Not Called	Not Called	Not Called	Not Called	Not Called	Not Called	Not Called	Not Called	Not Called	Not Called	Not Called	Not Called	Not Called	Not Called	Not Called	Not Called	Not Called
TCGA-DB-A64U	TCGA-DB-A64U-01	OAST	Diffuse Glioma	Oligoastrocytoma	Oligoastrocytoma	G2	Yes	No	DB	CNS	2	Lost	Not Called	Not Called	Not Called	Not Called	Not Called	Not Called	Not Called	Not Called	Not Called	Not Called	Not Called	Not Called	Not Called	Not Called	Not Called	Not Called	Not Called	Not Called	Not Called	Not Called	Not Called	Not Called	Not Called	Not Called	Not Called	Not Called	Not Called	Not Called	Not Called	Not Called	Not Called	Not Called	Not Called	Lost	Not Called	Not Called	Not Called
TCGA-DB-A64V	TCGA-DB-A64V-01	ODG	Diffuse Glioma	Oligodendroglioma	Oligodendroglioma	G2	Yes	No	DB	CNS	2	Lost	Not Called	Not Called	Not Called	Not Called	Not Called	Not Called	Not Called	Not Called	Not Called	Not Called	Not Called	Not Called	Not Called	Not Called	Not Called	Not Called	Not Called	Not Called	Not Called	Not Called	Not Called	Not Called	Not Called	Not Called	Not Called	Not Called	Not Called	Not Called	Not Called	Not Called	Not Called	Not Called	Not Called	Lost	Not Called	Not Called	Not Called
TCGA-DB-A64W	TCGA-DB-A64W-01	OAST	Diffuse Glioma	Oligoastrocytoma	Oligoastrocytoma	G3	Yes	No	DB	CNS	5	Lost	Not Called	Not Called	Not Called	Not Called	Not Called	Lost	Lost	Not Called	Not Called	Not Called	Not Called	Not Called	Not Called	Not Called	Not Called	Not Called	Not Called	Not Called	Not Called	Not Called	Not Called	Not Called	Not Called	Not Called	Not Called	Not Called	Not Called	Not Called	Not Called	Not Called	Not Called	Not Called	Not Called	Lost	Not Called	Not Called	Gained
TCGA-DB-A64X	TCGA-DB-A64X-01	DIFG	Diffuse Glioma	Astrocytoma	Astrocytoma	G3	Yes	No	DB	CNS	0	Not Called	Not Called	Not Called	Not Called	Not Called	Not Called		Not Called		Not Called	Not Called	Not Called	Not Called	Not Called			Not Called	Not Called	Not Called	Not Called	Not Called	Not Called	Not Called	Not Called	Not Called	Not Called	Not Called	Not Called	Not Called	Not Called	Not Called	Not Called	Not Called	Not Called	Not Called		Not Called	Not Called
TCGA-DB-A75K	TCGA-DB-A75K-01	OAST	Diffuse Glioma	Oligoastrocytoma	Oligoastrocytoma	G3	Yes	No	DB	CNS	2	Lost	Not Called	Not Called	Not Called	Not Called	Not Called	Not Called	Not Called	Not Called	Not Called	Not Called	Not Called	Not Called	Not Called	Not Called		Not Called	Not Called	Not Called	Not Called	Not Called	Not Called	Not Called	Not Called	Not Called	Not Called	Not Called	Not Called	Not Called	Not Called	Not Called	Not Called	Not Called	Not Called	Lost	Not Called	Not Called	Not Called
TCGA-DB-A75L	TCGA-DB-A75L-01	DIFG	Diffuse Glioma	Astrocytoma	Astrocytoma	G3	Yes	No	DB	CNS	4	Not Called	Not Called	Not Called	Not Called	Not Called	Not Called	Not Called	Not Called	Not Called		Not Called	Not Called	Not Called	Not Called	Not Called	Not Called		Not Called	Not Called	Lost	Not Called	Gained	Not Called	Not Called	Not Called	Not Called	Not Called	Not Called	Not Called	Not Called	Not Called	Not Called	Not Called	Gained	Lost	Not Called	Not Called
TCGA-DB-A75M	TCGA-DB-A75M-01	DIFG	Diffuse Glioma	Astrocytoma	Astrocytoma	G2	Yes	No	DB	CNS	1	Not Called	Not Called	Not Called	Not Called	Not Called	Not Called	Not Called	Not Called	Not Called	Not Called	Not Called	Not Called	Not Called	Not Called	Not Called	Not Called	Not Called	Not Called	Gained	Not Called	Not Called	Not Called	Not Called	Not Called	Not Called	Not Called	Not Called	Not Called	Not Called	Not Called	Not Called	Not Called	Not Called	Not Called	Not Called	Not Called	Not Called	Not Called
TCGA-DB-A75O	TCGA-DB-A75O-01	DIFG	Diffuse Glioma	Astrocytoma	Astrocytoma	G3	Yes	No	DB	CNS	2	Not Called	Not Called	Not Called	Not Called	Not Called	Not Called	Not Called	Lost	Not Called	Not Called		Not Called	Not Called		Not Called	Not Called	Not Called	Not Called	Not Called	Not Called	Not Called	Not Called	Not Called	Not Called		Not Called	Not Called	Not Called		Not Called	Not Called	Not Called	Not Called	Not Called	Not Called	Gained	Not Called	Not Called
TCGA-DB-A75P	TCGA-DB-A75P-01	DIFG	Diffuse Glioma	Astrocytoma	Astrocytoma	G2	Yes	No	DB	CNS	2	Not Called	Not Called	Not Called	Not Called	Not Called	Not Called	Not Called	Not Called	Not Called	Not Called	Not Called	Not Called	Not Called	Not Called	Not Called	Not Called	Lost	Lost	Not Called	Not Called	Not Called	Not Called	Not Called	Not Called	Not Called	Not Called	Not Called	Not Called	Not Called	Not Called	Not Called	Not Called	Not Called	Not Called	Not Called	Not Called	Not Called	Not Called
TCGA-DH-5140	TCGA-DH-5140-01	OAST	Diffuse Glioma	Oligoastrocytoma	Oligoastrocytoma	G3	No	Yes	DH	CNS	13	Not Called	Not Called	Not Called	Not Called	Not Called	Not Called	Not Called	Not Called	Lost	Lost	Not Called	Not Called	Not Called	Not Called	Lost	Lost	Not Called	Not Called	Lost	Lost	Lost	Lost	Not Called	Not Called	Not Called	Lost	Lost	Not Called	Not Called	Not Called		Lost	Lost	Not Called	Not Called	Not Called	Not Called	Lost
TCGA-DH-5141	TCGA-DH-5141-01	ODG	Diffuse Glioma	Oligodendroglioma	Oligodendroglioma	G3	No	Yes	DH	CNS	2	Lost	Not Called	Not Called	Not Called	Not Called	Not Called	Not Called	Not Called	Not Called	Not Called	Not Called	Not Called	Not Called	Not Called	Not Called	Not Called	Not Called	Not Called	Not Called	Not Called	Not Called	Not Called	Not Called	Not Called	Not Called	Not Called	Not Called	Not Called	Not Called	Not Called	Not Called	Not Called	Not Called	Not Called	Lost	Not Called	Not Called	Not Called
TCGA-DH-5142	TCGA-DH-5142-01	DIFG	Diffuse Glioma	Astrocytoma	Astrocytoma	G3	No	Yes	DH	CNS	5	Not Called	Not Called	Not Called	Not Called	Not Called	Not Called	Not Called	Not Called	Not Called	Not Called	Not Called	Not Called	Not Called	Not Called		Not Called	Not Called		Not Called	Not Called	Lost	Not Called	Not Called	Not Called		Lost	Lost	Not Called	Not Called	Not Called	Not Called	Not Called	Not Called	Gained		Not Called	Not Called	Lost
TCGA-DH-5143	TCGA-DH-5143-01	OAST	Diffuse Glioma	Oligoastrocytoma	Oligoastrocytoma	G3	No	Yes	DH	CNS	1	Not Called	Not Called	Not Called	Not Called	Not Called	Not Called	Not Called	Not Called	Not Called	Not Called	Not Called	Not Called	Not Called	Not Called	Not Called	Not Called	Not Called	Not Called	Not Called	Not Called	Not Called	Not Called	Not Called	Not Called	Not Called	Lost	Not Called	Not Called	Not Called	Not Called	Not Called	Not Called	Not Called	Not Called	Not Called	Not Called	Not Called	Not Called
TCGA-DH-5144	TCGA-DH-5144-01	ODG	Diffuse Glioma	Oligodendroglioma	Oligodendroglioma	G3	No	Yes	DH	CNS	2	Lost	Not Called	Not Called	Not Called	Not Called	Not Called	Not Called	Not Called	Not Called	Not Called	Not Called	Not Called	Not Called	Not Called	Not Called	Not Called	Not Called	Not Called	Not Called	Not Called	Not Called	Not Called	Not Called	Not Called	Not Called	Not Called	Not Called	Not Called	Not Called	Not Called	Not Called	Not Called	Not Called	Not Called	Lost	Not Called	Not Called	Not Called
TCGA-DH-A669	TCGA-DH-A669-01	ODG	Diffuse Glioma	Oligodendroglioma	Oligodendroglioma	G3	No	Yes	DH	CNS	26	Lost	Gained	Not Called		Not Called	Not Called	Lost	Lost	Not Called	Not Called	Lost	Lost	Gained	Gained	Not Called	Not Called	Not Called	Not Called	Lost	Lost	Not Called	Not Called	Gained	Gained	Lost	Gained	Lost	Lost	Lost	Gained	Gained	Lost	Lost	Gained	Lost	Gained	Gained	Not Called
TCGA-DH-A66B	TCGA-DH-A66B-01	DIFG	Diffuse Glioma	Astrocytoma	Astrocytoma	G3	No	Yes	DH	CNS	10	Not Called	Not Called			Not Called	Not Called	Not Called	Lost	Not Called		Not Called	Lost	Not Called	Lost	Lost	Not Called	Not Called	Not Called	Gained		Not Called	Not Called	Not Called	Lost	Not Called	Not Called	Not Called	Gained	Not Called		Not Called	Lost		Not Called	Lost	Gained	Not Called
TCGA-DH-A66D	TCGA-DH-A66D-01	DIFG	Diffuse Glioma	Astrocytoma	Astrocytoma	G3	No	Yes	DH	CNS	4	Not Called	Not Called	Not Called	Not Called	Lost	Not Called	Not Called	Not Called	Lost	Lost	Not Called	Not Called	Not Called		Not Called	Not Called	Not Called	Not Called	Not Called			Not Called	Not Called	Not Called	Lost	Not Called	Not Called	Not Called	Not Called	Not Called	Not Called	Not Called	Not Called	Not Called		Not Called	Not Called	Not Called
TCGA-DH-A66F	TCGA-DH-A66F-01	ODG	Diffuse Glioma	Oligodendroglioma	Oligodendroglioma	G2	Yes	No	DH	CNS	2	Lost	Not Called	Not Called	Not Called	Not Called	Not Called	Not Called	Not Called	Not Called	Not Called	Not Called	Not Called	Not Called	Not Called	Not Called	Not Called	Not Called	Not Called	Not Called	Not Called	Not Called	Not Called	Not Called	Not Called	Not Called	Not Called	Not Called	Not Called	Not Called	Not Called	Not Called	Not Called	Not Called	Not Called	Lost	Not Called	Not Called	Not Called
TCGA-DH-A66G	TCGA-DH-A66G-01	ODG	Diffuse Glioma	Oligodendroglioma	Oligodendroglioma	G3	Yes	No	DH	CNS	5	Not Called	Not Called	Not Called	Not Called	Not Called	Not Called	Lost	Lost	Lost	Lost		Not Called	Not Called	Not Called	Not Called	Not Called	Not Called	Not Called		Not Called	Lost	Not Called		Not Called		Not Called	Not Called	Not Called	Not Called		Not Called	Not Called	Not Called	Not Called		Not Called	Not Called	Not Called
TCGA-DH-A7UR	TCGA-DH-A7UR-01	ODG	Diffuse Glioma	Oligodendroglioma	Oligodendroglioma	G3	No	Yes	DH	CNS	3	Lost	Not Called			Not Called	Not Called	Not Called	Not Called	Not Called	Not Called	Not Called	Not Called	Not Called	Not Called	Not Called	Not Called	Lost	Not Called	Not Called	Not Called	Not Called	Not Called	Not Called	Not Called	Not Called	Not Called	Not Called	Not Called	Not Called	Not Called	Not Called	Not Called	Not Called	Not Called	Lost	Not Called	Not Called	Not Called
TCGA-DH-A7US	TCGA-DH-A7US-01	ODG	Diffuse Glioma	Oligodendroglioma	Oligodendroglioma	G2	Yes	No	DH	CNS	2	Lost	Not Called	Not Called	Not Called	Not Called	Not Called	Not Called	Not Called	Not Called	Not Called	Not Called	Not Called	Not Called	Not Called	Not Called	Not Called	Not Called	Not Called	Not Called	Not Called	Not Called	Not Called	Not Called	Not Called	Not Called	Not Called	Not Called	Not Called	Not Called	Not Called	Not Called	Not Called	Not Called	Not Called	Lost	Not Called	Not Called	Not Called
TCGA-DH-A7UT	TCGA-DH-A7UT-01	DIFG	Diffuse Glioma	Astrocytoma	Astrocytoma	G3	Yes	No	DH	CNS	7	Not Called	Not Called	Not Called	Not Called	Not Called	Not Called	Lost	Not Called	Not Called	Not Called	Not Called	Not Called	Gained	Gained	Gained	Gained	Not Called	Not Called	Not Called	Not Called	Lost	Gained	Not Called	Not Called	Not Called	Not Called	Not Called	Not Called	Not Called	Not Called	Not Called	Not Called	Not Called	Not Called	Not Called	Not Called	Not Called	Not Called
TCGA-DH-A7UU	TCGA-DH-A7UU-01	DIFG	Diffuse Glioma	Astrocytoma	Astrocytoma	G3	Yes	No	DH	CNS	4	Not Called	Not Called	Not Called	Not Called	Not Called	Not Called	Not Called	Not Called	Not Called		Not Called	Not Called	Not Called	Not Called	Not Called	Not Called	Not Called	Not Called	Gained	Lost	Lost	Not Called	Not Called	Not Called	Lost	Not Called	Not Called	Not Called	Not Called	Not Called	Not Called	Not Called	Not Called	Not Called	Not Called	Not Called	Not Called	Not Called
TCGA-DH-A7UV	TCGA-DH-A7UV-01	DIFG	Diffuse Glioma	Astrocytoma	Astrocytoma	G3	Yes	No	DH	CNS	2	Not Called	Not Called	Not Called	Not Called	Not Called	Not Called	Not Called	Not Called	Not Called	Not Called	Not Called	Not Called	Not Called	Gained	Not Called	Not Called	Not Called	Not Called	Gained	Not Called	Not Called	Not Called	Not Called	Not Called	Not Called	Not Called	Not Called	Not Called	Not Called	Not Called	Not Called	Not Called	Not Called	Not Called	Not Called	Not Called	Not Called	Not Called
TCGA-DU-5847	TCGA-DU-5847-01	DIFG	Diffuse Glioma	Astrocytoma	Astrocytoma	G3	Yes	No	DU	CNS	7	Not Called	Not Called	Not Called	Not Called	Not Called	Not Called	Not Called	Not Called	Not Called	Not Called	Not Called	Lost	Not Called	Not Called		Not Called		Not Called	Lost	Lost	Not Called	Not Called	Not Called	Not Called	Lost	Lost	Not Called		Lost	Not Called	Not Called	Not Called	Not Called	Not Called	Not Called	Not Called	Not Called	Not Called
TCGA-DU-5849	TCGA-DU-5849-01	ODG	Diffuse Glioma	Oligodendroglioma	Oligodendroglioma	G2	Yes	No	DU	CNS	3	Lost	Not Called	Not Called	Not Called	Not Called	Not Called	Not Called	Not Called	Not Called	Not Called	Not Called	Not Called	Not Called		Not Called	Not Called	Not Called	Not Called	Not Called	Not Called	Not Called	Not Called	Not Called	Not Called	Not Called	Not Called	Not Called	Not Called	Not Called	Not Called	Not Called	Gained		Not Called	Lost	Not Called	Not Called	Not Called
TCGA-DU-5851	TCGA-DU-5851-01	OAST	Diffuse Glioma	Oligoastrocytoma	Oligoastrocytoma	G3	Yes	No	DU	CNS	0	Not Called	Not Called	Not Called	Not Called	Not Called	Not Called	Not Called		Not Called	Not Called	Not Called	Not Called	Not Called	Not Called	Not Called	Not Called		Not Called	Not Called	Not Called		Not Called	Not Called	Not Called	Not Called		Not Called	Not Called	Not Called	Not Called	Not Called	Not Called	Not Called	Not Called		Not Called	Not Called	Not Called
TCGA-DU-5852	TCGA-DU-5852-01	OAST	Diffuse Glioma	Oligoastrocytoma	Oligoastrocytoma	G3	No	Yes	DU	CNS	6	Not Called	Not Called	Not Called	Not Called	Not Called	Not Called		Not Called	Not Called	Not Called	Not Called	Not Called	Not Called	Not Called	Not Called	Not Called		Not Called	Lost	Lost	Not Called	Not Called	Not Called	Not Called		Lost	Not Called	Not Called	Not Called	Not Called	Not Called	Not Called	Not Called	Not Called	Not Called	Gained	Gained	Not Called
TCGA-DU-5853	TCGA-DU-5853-01	OAST	Diffuse Glioma	Oligoastrocytoma	Oligoastrocytoma	G2	Yes	No	DU	CNS	0	Not Called	Not Called	Not Called	Not Called	Not Called	Not Called	Not Called	Not Called	Not Called	Not Called	Not Called	Not Called	Not Called	Not Called	Not Called	Not Called	Not Called	Not Called	Not Called	Not Called	Not Called	Not Called	Not Called	Not Called	Not Called	Not Called	Not Called	Not Called	Not Called	Not Called	Not Called	Not Called	Not Called	Not Called	Not Called	Not Called	Not Called	Not Called
TCGA-DU-5854	TCGA-DU-5854-01	DIFG	Diffuse Glioma	Astrocytoma	Astrocytoma	G3	Yes	No	DU	CNS	7	Not Called	Not Called	Not Called	Not Called	Not Called	Not Called	Not Called	Not Called	Not Called	Not Called	Not Called	Not Called	Gained	Gained	Not Called	Not Called		Not Called	Lost	Lost	Not Called	Not Called	Not Called	Not Called	Not Called	Not Called	Not Called	Not Called	Not Called	Not Called		Not Called		Gained		Gained	Gained	Not Called
TCGA-DU-5855	TCGA-DU-5855-01	OAST	Diffuse Glioma	Oligoastrocytoma	Oligoastrocytoma	G3	Yes	No	DU	CNS	1	Not Called	Not Called	Not Called	Not Called	Not Called	Not Called	Not Called	Not Called	Not Called	Not Called	Not Called		Not Called		Not Called	Not Called	Lost	Not Called	Not Called	Not Called	Not Called		Not Called	Not Called	Not Called		Not Called	Not Called		Not Called	Not Called	Not Called	Not Called	Not Called	Not Called	Not Called	Not Called	Not Called
TCGA-DU-5870	TCGA-DU-5870-01	ODG	Diffuse Glioma	Oligodendroglioma	Oligodendroglioma	G2	No	Yes	DU	CNS
TCGA-DU-5871	TCGA-DU-5871-01	OAST	Diffuse Glioma	Oligoastrocytoma	Oligoastrocytoma	G2	Yes	No	DU	CNS	1	Not Called	Not Called	Not Called	Not Called	Not Called	Not Called	Not Called	Not Called	Not Called	Not Called	Not Called	Not Called	Not Called	Not Called	Not Called	Gained	Not Called	Not Called	Not Called	Not Called	Not Called	Not Called	Not Called	Not Called	Not Called	Not Called	Not Called	Not Called	Not Called	Not Called	Not Called	Not Called	Not Called	Not Called	Not Called	Not Called	Not Called	Not Called
TCGA-DU-5872	TCGA-DU-5872-01	OAST	Diffuse Glioma	Oligoastrocytoma	Oligoastrocytoma	G2	Yes	No	DU	CNS	1	Not Called	Not Called	Not Called	Not Called	Not Called	Not Called	Not Called	Not Called	Not Called	Not Called	Not Called	Lost	Not Called		Not Called	Not Called	Not Called	Not Called	Not Called		Not Called	Not Called	Not Called	Not Called	Not Called		Not Called	Not Called	Not Called	Not Called	Not Called	Not Called	Not Called	Not Called		Not Called	Not Called	Not Called
TCGA-DU-5874	TCGA-DU-5874-01	ODG	Diffuse Glioma	Oligodendroglioma	Oligodendroglioma	G2	Yes	No	DU	CNS	2	Lost	Not Called	Not Called	Not Called	Not Called	Not Called	Not Called		Not Called	Not Called	Not Called	Not Called	Not Called	Not Called	Not Called	Not Called	Not Called	Not Called	Not Called	Not Called	Not Called	Not Called	Not Called	Not Called	Not Called	Not Called	Not Called	Not Called	Not Called	Not Called	Not Called	Not Called	Not Called	Not Called	Lost	Not Called	Not Called	Not Called
TCGA-DU-6392	TCGA-DU-6392-01	DIFG	Diffuse Glioma	Astrocytoma	Astrocytoma	G3	No	Yes	DU	CNS	2		Not Called	Not Called	Not Called	Not Called	Not Called	Not Called	Not Called	Not Called	Not Called	Not Called	Not Called	Gained	Gained	Not Called	Not Called	Not Called	Not Called	Not Called	Not Called	Not Called	Not Called	Not Called	Not Called	Not Called	Not Called	Not Called	Not Called	Not Called	Not Called	Not Called	Not Called	Not Called	Not Called	Not Called	Not Called	Not Called	Not Called
TCGA-DU-6393	TCGA-DU-6393-01	ODG	Diffuse Glioma	Oligodendroglioma	Oligodendroglioma	G3	No	Yes	DU	CNS	8	Lost	Not Called	Not Called	Not Called	Not Called	Not Called	Not Called	Not Called	Not Called	Not Called	Not Called	Not Called	Not Called	Not Called	Not Called	Not Called	Not Called	Not Called	Not Called	Not Called	Gained	Gained	Not Called	Not Called	Not Called	Not Called	Lost	Not Called	Not Called	Not Called	Not Called	Lost	Lost	Not Called	Lost	Not Called	Not Called	Gained
TCGA-DU-6394	TCGA-DU-6394-01	ODG	Diffuse Glioma	Oligodendroglioma	Oligodendroglioma	G3	No	Yes	DU	CNS	2	Lost	Not Called	Not Called	Not Called	Not Called	Not Called	Not Called	Not Called	Not Called	Not Called	Not Called	Not Called	Not Called	Not Called	Not Called	Not Called	Not Called	Not Called	Not Called	Not Called	Not Called	Not Called	Not Called	Not Called	Not Called	Not Called	Not Called	Not Called	Not Called	Not Called	Not Called	Not Called	Not Called	Not Called	Lost	Not Called	Not Called	Not Called
TCGA-DU-6395	TCGA-DU-6395-01	OAST	Diffuse Glioma	Oligoastrocytoma	Oligoastrocytoma	G2	No	Yes	DU	CNS	3	Not Called	Not Called	Not Called	Not Called	Not Called	Not Called	Not Called	Not Called	Not Called	Not Called	Not Called	Not Called	Gained	Gained	Not Called	Not Called		Not Called	Not Called	Not Called	Not Called	Not Called	Gained	Not Called	Not Called	Not Called	Not Called	Not Called	Not Called	Not Called	Not Called	Not Called		Not Called	Not Called	Not Called	Not Called	Not Called
TCGA-DU-6396	TCGA-DU-6396-01	OAST	Diffuse Glioma	Oligoastrocytoma	Oligoastrocytoma	G3	No	Yes	DU	CNS	2	Not Called			Not Called		Not Called	Not Called	Not Called	Not Called	Not Called	Not Called	Not Called	Not Called	Not Called	Not Called	Not Called	Not Called	Not Called		Lost	Lost	Not Called		Not Called	Not Called		Not Called	Not Called	Not Called	Not Called	Not Called	Not Called	Not Called			Not Called		Not Called
TCGA-DU-6397	TCGA-DU-6397-01	ODG	Diffuse Glioma	Oligodendroglioma	Oligodendroglioma	G3	No	Yes	DU	CNS	2	Lost	Not Called	Not Called	Not Called	Not Called	Not Called	Not Called	Not Called	Not Called	Not Called	Not Called	Not Called		Not Called	Not Called	Not Called	Not Called	Not Called	Not Called	Not Called		Not Called	Not Called	Not Called	Not Called	Not Called	Not Called	Not Called	Not Called	Not Called	Not Called	Not Called	Not Called	Not Called	Lost	Not Called	Not Called	Not Called
TCGA-DU-6399	TCGA-DU-6399-01	ODG	Diffuse Glioma	Oligodendroglioma	Oligodendroglioma	G2	No	Yes	DU	CNS	1	Not Called	Not Called	Not Called	Not Called	Not Called	Not Called	Not Called	Not Called	Not Called	Not Called	Not Called	Not Called	Not Called		Not Called			Not Called	Not Called	Not Called	Not Called	Not Called	Not Called	Not Called	Lost	Not Called	Not Called	Not Called	Not Called	Not Called		Not Called	Not Called	Not Called		Not Called	Not Called	Not Called
TCGA-DU-6400	TCGA-DU-6400-01	ODG	Diffuse Glioma	Oligodendroglioma	Oligodendroglioma	G2	No	Yes	DU	CNS	3	Lost	Not Called	Not Called	Not Called	Not Called	Not Called	Not Called	Not Called	Not Called	Not Called	Not Called	Not Called	Not Called	Not Called	Not Called	Not Called	Not Called	Not Called	Not Called	Not Called	Not Called	Not Called	Not Called	Not Called	Lost	Not Called	Not Called	Not Called	Not Called	Not Called	Not Called	Not Called	Not Called	Not Called	Lost	Not Called	Not Called	Not Called
TCGA-DU-6401	TCGA-DU-6401-01	ODG	Diffuse Glioma	Oligodendroglioma	Oligodendroglioma	G2	No	Yes	DU	CNS	2	Not Called	Not Called	Lost	Not Called	Not Called	Not Called	Not Called	Not Called	Not Called		Not Called		Not Called	Not Called	Not Called	Not Called	Not Called	Not Called	Not Called		Not Called	Not Called	Not Called	Lost	Not Called	Not Called	Not Called	Not Called	Not Called	Not Called	Not Called	Not Called	Not Called	Not Called	Not Called	Not Called	Not Called	Not Called
TCGA-DU-6402	TCGA-DU-6402-01	DIFG	Diffuse Glioma	Astrocytoma	Astrocytoma	G3	No	Yes	DU	CNS	5	Not Called	Not Called	Not Called	Not Called	Not Called	Not Called	Not Called	Not Called	Not Called	Not Called		Not Called	Gained	Gained	Not Called	Not Called	Lost	Not Called	Lost	Lost	Not Called	Not Called	Not Called	Not Called	Not Called	Not Called	Not Called	Not Called	Not Called	Not Called	Not Called	Not Called				Not Called	Not Called	Not Called
TCGA-DU-6403	TCGA-DU-6403-01	OAST	Diffuse Glioma	Oligoastrocytoma	Oligoastrocytoma	G3	No	Yes	DU	CNS	4	Not Called	Not Called	Not Called	Not Called	Not Called	Not Called	Not Called	Not Called	Not Called	Not Called	Not Called	Not Called	Gained	Gained	Not Called	Not Called	Lost	Not Called		Lost	Not Called	Not Called		Not Called	Not Called		Not Called	Not Called	Not Called	Not Called	Not Called	Not Called	Not Called	Not Called	Not Called	Not Called	Not Called	Not Called
TCGA-DU-6404	TCGA-DU-6404-01	ODG	Diffuse Glioma	Oligodendroglioma	Oligodendroglioma	G3	No	Yes	DU	CNS	2	Not Called	Not Called	Not Called	Not Called	Not Called	Not Called	Not Called	Not Called	Not Called	Not Called	Not Called	Not Called	Gained	Gained	Not Called	Not Called	Not Called	Not Called	Not Called	Not Called	Not Called	Not Called	Not Called	Not Called	Not Called	Not Called	Not Called	Not Called	Not Called	Not Called	Not Called	Not Called	Not Called	Not Called	Not Called	Not Called	Not Called	Not Called
TCGA-DU-6405	TCGA-DU-6405-01	DIFG	Diffuse Glioma	Astrocytoma	Astrocytoma	G3	No	Yes	DU	CNS	4	Not Called	Not Called	Not Called	Not Called	Not Called	Not Called	Not Called	Not Called	Not Called	Not Called	Not Called	Lost	Not Called	Gained	Not Called	Not Called		Not Called	Lost	Lost	Not Called	Not Called	Not Called	Not Called	Not Called	Not Called	Not Called	Not Called	Not Called	Not Called	Not Called	Not Called	Not Called	Not Called	Not Called	Not Called	Not Called	Not Called
TCGA-DU-6406	TCGA-DU-6406-01	OAST	Diffuse Glioma	Oligoastrocytoma	Oligoastrocytoma	G3	No	Yes	DU	CNS	8	Not Called	Not Called	Not Called	Not Called	Not Called	Not Called	Not Called	Not Called	Not Called	Not Called	Not Called	Not Called	Gained	Gained	Not Called	Not Called		Not Called	Lost	Lost	Not Called	Not Called	Not Called	Not Called	Not Called	Not Called	Not Called	Not Called	Not Called	Not Called	Not Called	Not Called	Not Called	Gained	Gained	Gained	Gained	Not Called
TCGA-DU-6407	TCGA-DU-6407-01	ODG	Diffuse Glioma	Oligodendroglioma	Oligodendroglioma	G2	No	Yes	DU	CNS	7	Not Called	Not Called		Not Called	Not Called	Not Called	Not Called	Not Called	Not Called	Not Called		Not Called	Gained	Gained	Gained	Gained		Not Called	Not Called	Not Called	Not Called	Not Called	Not Called	Not Called	Not Called	Not Called	Not Called	Not Called	Not Called	Not Called	Not Called	Lost	Lost	Not Called	Not Called	Not Called	Not Called	Gained
TCGA-DU-6408	TCGA-DU-6408-01	ODG	Diffuse Glioma	Oligodendroglioma	Oligodendroglioma	G3	No	Yes	DU	CNS	1	Not Called	Not Called	Not Called	Not Called	Not Called	Not Called	Not Called	Not Called	Not Called	Not Called	Not Called	Not Called	Not Called	Not Called	Not Called		Not Called	Not Called		Not Called	Lost	Not Called		Not Called	Not Called		Not Called	Not Called	Not Called	Not Called	Not Called	Not Called	Not Called	Not Called		Not Called	Not Called	Not Called
TCGA-DU-6410	TCGA-DU-6410-01	ODG	Diffuse Glioma	Oligodendroglioma	Oligodendroglioma	G3	Yes	No	DU	CNS	6	Lost	Not Called	Not Called	Not Called	Not Called	Not Called	Lost	Lost	Not Called	Not Called	Not Called	Not Called	Gained	Gained	Not Called	Not Called	Not Called	Not Called	Not Called	Not Called	Not Called	Not Called	Not Called	Not Called	Not Called	Not Called	Not Called	Not Called	Not Called	Not Called	Not Called	Not Called	Not Called	Not Called	Lost	Not Called	Not Called	Not Called
TCGA-DU-6542	TCGA-DU-6542-01	OAST	Diffuse Glioma	Oligoastrocytoma	Oligoastrocytoma	G3	Yes	No	DU	CNS	1	Not Called	Not Called	Not Called	Not Called	Not Called	Not Called	Not Called	Not Called	Not Called	Not Called	Not Called	Lost	Not Called	Not Called	Not Called	Not Called	Not Called	Not Called	Not Called	Not Called	Not Called	Not Called	Not Called		Not Called		Not Called	Not Called	Not Called	Not Called	Not Called	Not Called	Not Called	Not Called		Not Called	Not Called	Not Called
TCGA-DU-7006	TCGA-DU-7006-01	DIFG	Diffuse Glioma	Astrocytoma	Astrocytoma	G3	No	Yes	DU	CNS	6		Not Called	Not Called	Not Called	Not Called	Not Called	Not Called	Not Called	Not Called	Not Called	Not Called		Gained	Gained	Not Called	Not Called	Lost	Not Called	Lost	Lost	Lost		Not Called	Not Called	Not Called	Not Called	Not Called		Not Called	Not Called	Not Called	Not Called	Not Called	Not Called	Not Called	Not Called	Not Called	Not Called
TCGA-DU-7007	TCGA-DU-7007-01	DIFG	Diffuse Glioma	Astrocytoma	Astrocytoma	G2	No	Yes	DU	CNS	2	Not Called	Not Called	Not Called	Not Called	Not Called	Lost	Not Called		Not Called	Not Called	Not Called	Not Called	Not Called	Not Called	Not Called	Not Called	Not Called	Not Called	Not Called		Lost	Not Called		Not Called	Not Called	Not Called	Not Called	Not Called	Not Called	Not Called	Not Called	Not Called	Not Called	Not Called	Not Called	Not Called	Not Called	Not Called
TCGA-DU-7008	TCGA-DU-7008-01	ODG	Diffuse Glioma	Oligodendroglioma	Oligodendroglioma	G2	No	Yes	DU	CNS	0	Not Called	Not Called	Not Called	Not Called	Not Called	Not Called	Not Called	Not Called	Not Called	Not Called	Not Called	Not Called	Not Called		Not Called	Not Called	Not Called	Not Called	Not Called	Not Called	Not Called	Not Called	Not Called	Not Called	Not Called	Not Called	Not Called	Not Called	Not Called	Not Called	Not Called	Not Called	Not Called	Not Called	Not Called	Not Called	Not Called	Not Called
TCGA-DU-7009	TCGA-DU-7009-01	ODG	Diffuse Glioma	Oligodendroglioma	Oligodendroglioma	G2	No	Yes	DU	CNS	4	Lost	Not Called	Not Called	Not Called	Not Called	Not Called	Not Called	Not Called	Not Called	Not Called	Not Called	Not Called	Not Called		Not Called	Not Called	Not Called	Not Called	Not Called	Not Called	Not Called	Not Called	Not Called	Not Called	Not Called	Not Called	Not Called	Not Called	Not Called	Not Called	Not Called	Lost	Lost	Not Called	Lost	Not Called	Not Called	Not Called
TCGA-DU-7010	TCGA-DU-7010-01	DIFG	Diffuse Glioma	Astrocytoma	Astrocytoma	G3	No	Yes	DU	CNS	18	Gained	Gained	Lost	Not Called	Lost		Gained	Lost	Not Called	Lost	Not Called	Not Called	Not Called	Not Called	Not Called	Not Called	Gained	Gained	Not Called		Lost	Lost	Not Called		Lost	Lost		Gained	Gained	Lost		Gained	Not Called	Not Called	Not Called		Not Called	Lost
TCGA-DU-7011	TCGA-DU-7011-01	OAST	Diffuse Glioma	Oligoastrocytoma	Oligoastrocytoma	G2	No	Yes	DU	CNS	2	Not Called	Not Called	Not Called	Not Called	Not Called	Not Called	Not Called	Not Called	Not Called	Not Called	Not Called	Not Called	Gained	Gained	Not Called	Not Called	Not Called	Not Called	Not Called	Not Called	Not Called	Not Called	Not Called	Not Called	Not Called	Not Called	Not Called	Not Called	Not Called	Not Called	Not Called	Not Called	Not Called	Not Called	Not Called	Not Called	Not Called	Not Called
TCGA-DU-7012	TCGA-DU-7012-01	DIFG	Diffuse Glioma	Astrocytoma	Astrocytoma	G3	No	Yes	DU	CNS	7	Not Called	Not Called	Not Called	Not Called	Not Called	Not Called	Not Called	Not Called	Not Called	Not Called	Not Called	Lost	Gained	Gained	Not Called	Not Called	Not Called	Not Called	Lost	Lost	Not Called	Not Called	Not Called	Not Called	Not Called	Lost	Not Called	Not Called	Lost	Not Called	Not Called	Not Called		Not Called	Not Called	Not Called	Not Called	Not Called
TCGA-DU-7013	TCGA-DU-7013-01	DIFG	Diffuse Glioma	Astrocytoma	Astrocytoma	G3	No	Yes	DU	CNS	8	Not Called	Not Called	Not Called	Not Called	Not Called	Gained	Not Called	Not Called	Not Called	Not Called	Not Called	Not Called	Gained	Gained	Gained	Gained	Not Called	Not Called	Lost	Lost	Not Called	Not Called	Not Called	Not Called	Not Called	Not Called	Not Called	Not Called	Not Called		Gained	Not Called	Not Called	Not Called	Not Called	Not Called	Not Called	Not Called
TCGA-DU-7014	TCGA-DU-7014-01	ODG	Diffuse Glioma	Oligodendroglioma	Oligodendroglioma	G2	No	Yes	DU	CNS	4	Not Called	Not Called	Not Called	Not Called	Not Called	Not Called	Not Called	Not Called	Not Called	Not Called	Not Called	Not Called	Not Called	Not Called	Gained	Gained	Not Called	Not Called	Gained	Not Called	Not Called	Not Called	Not Called	Not Called	Not Called	Not Called	Not Called	Not Called	Lost	Not Called	Not Called	Not Called	Not Called	Not Called	Not Called	Not Called	Not Called	Not Called
TCGA-DU-7015	TCGA-DU-7015-01	ODG	Diffuse Glioma	Oligodendroglioma	Oligodendroglioma	G2	No	Yes	DU	CNS	3	Not Called	Gained	Not Called	Not Called	Not Called	Not Called	Not Called	Not Called	Not Called	Not Called	Not Called	Not Called	Gained		Not Called		Lost	Not Called	Not Called	Not Called	Not Called		Not Called	Not Called	Not Called	Not Called	Not Called	Not Called	Not Called		Not Called	Not Called	Not Called	Not Called	Not Called	Not Called	Not Called	Not Called
TCGA-DU-7018	TCGA-DU-7018-01	ODG	Diffuse Glioma	Oligodendroglioma	Oligodendroglioma	G3	No	Yes	DU	CNS	6	Lost	Not Called	Not Called	Not Called	Not Called	Not Called	Lost	Lost	Not Called	Not Called	Not Called	Not Called	Not Called	Not Called	Not Called	Not Called	Not Called	Not Called	Not Called	Not Called	Gained	Gained	Not Called	Not Called	Not Called	Not Called	Not Called	Not Called	Not Called	Not Called	Not Called	Not Called	Not Called	Not Called	Lost	Not Called	Not Called	Not Called
TCGA-DU-7019	TCGA-DU-7019-01	OAST	Diffuse Glioma	Oligoastrocytoma	Oligoastrocytoma	NA	Yes	No	DU	CNS	1	Not Called	Not Called	Not Called	Not Called	Not Called	Not Called	Not Called	Not Called	Not Called	Not Called	Not Called	Not Called	Not Called	Not Called	Not Called	Not Called		Not Called	Gained	Not Called	Not Called	Not Called	Not Called	Not Called	Not Called		Not Called	Not Called	Not Called	Not Called	Not Called	Not Called	Not Called		Not Called	Not Called	Not Called	Not Called
TCGA-DU-7290	TCGA-DU-7290-01	DIFG	Diffuse Glioma	Astrocytoma	Astrocytoma	G3	No	Yes	DU	CNS	7	Gained	Gained	Not Called	Not Called	Not Called	Not Called	Not Called	Not Called	Not Called	Not Called	Not Called	Not Called	Not Called	Not Called	Not Called	Not Called	Not Called	Not Called	Lost	Lost	Not Called	Not Called	Not Called	Not Called	Lost	Lost	Not Called	Not Called	Not Called	Not Called	Not Called	Not Called	Not Called	Not Called	Not Called	Not Called	Not Called	Not Called
TCGA-DU-7292	TCGA-DU-7292-01	DIFG	Diffuse Glioma	Astrocytoma	Astrocytoma	G3	No	Yes	DU	CNS	4	Not Called	Not Called	Not Called	Not Called	Not Called	Not Called	Not Called	Not Called	Not Called	Not Called	Not Called	Not Called	Not Called	Gained	Not Called	Not Called	Lost	Not Called	Lost	Lost	Not Called	Not Called	Not Called	Not Called		Not Called	Not Called	Not Called	Not Called	Not Called	Not Called		Not Called	Not Called	Not Called	Not Called	Not Called	Not Called
TCGA-DU-7294	TCGA-DU-7294-01	ODG	Diffuse Glioma	Oligodendroglioma	Oligodendroglioma	G2	No	Yes	DU	CNS	4	Lost	Not Called	Not Called	Not Called	Not Called	Not Called	Lost	Lost	Not Called	Not Called	Not Called	Not Called	Not Called	Not Called	Not Called	Not Called	Not Called	Not Called	Not Called	Not Called	Not Called	Not Called	Not Called	Not Called	Not Called	Not Called	Not Called	Not Called	Not Called	Not Called	Not Called	Not Called	Not Called	Not Called	Lost	Not Called	Not Called	Not Called
TCGA-DU-7298	TCGA-DU-7298-01	DIFG	Diffuse Glioma	Astrocytoma	Astrocytoma	G3	No	Yes	DU	CNS	4	Not Called	Not Called	Not Called	Not Called	Not Called		Not Called	Not Called	Not Called	Not Called	Not Called	Lost	Not Called	Not Called	Not Called	Not Called		Gained	Not Called	Not Called	Not Called	Not Called	Not Called				Not Called	Not Called	Not Called	Not Called		Not Called	Not Called	Gained		Gained	Not Called	Not Called
TCGA-DU-7299	TCGA-DU-7299-01	DIFG	Diffuse Glioma	Astrocytoma	Astrocytoma	G3	No	Yes	DU	CNS	3	Not Called	Not Called	Not Called	Not Called	Not Called	Not Called	Not Called	Lost	Not Called	Not Called	Not Called	Not Called	Not Called	Not Called	Not Called	Not Called	Not Called	Not Called	Gained	Not Called	Not Called	Not Called	Gained	Not Called	Not Called	Not Called	Not Called	Not Called	Not Called	Not Called	Not Called	Not Called	Not Called	Not Called	Not Called	Not Called	Not Called	Not Called
TCGA-DU-7300	TCGA-DU-7300-01	ODG	Diffuse Glioma	Oligodendroglioma	Oligodendroglioma	G3	No	Yes	DU	CNS	4	Lost	Not Called	Not Called	Not Called	Not Called	Not Called	Not Called	Not Called	Not Called	Not Called	Not Called	Not Called	Not Called	Not Called	Not Called	Not Called	Not Called	Not Called	Not Called	Not Called	Not Called	Not Called	Not Called	Not Called	Not Called	Not Called	Not Called	Not Called	Not Called	Not Called	Not Called	Lost	Lost	Not Called	Lost	Not Called	Not Called	Not Called
TCGA-DU-7301	TCGA-DU-7301-01	ODG	Diffuse Glioma	Oligodendroglioma	Oligodendroglioma	G2	No	Yes	DU	CNS	1		Not Called	Not Called	Not Called	Not Called	Not Called	Not Called		Not Called	Not Called	Not Called	Not Called	Not Called		Not Called	Not Called		Not Called	Not Called	Not Called	Not Called	Not Called	Not Called	Not Called	Lost	Not Called	Not Called	Not Called	Not Called	Not Called	Not Called	Not Called	Not Called	Not Called	Not Called	Not Called	Not Called	Not Called
TCGA-DU-7302	TCGA-DU-7302-01	ODG	Diffuse Glioma	Oligodendroglioma	Oligodendroglioma	G3	No	Yes	DU	CNS	4	Lost	Not Called	Not Called	Not Called	Not Called	Not Called	Not Called	Lost	Not Called	Not Called	Not Called	Not Called	Not Called	Not Called	Not Called	Not Called		Not Called	Not Called	Not Called	Not Called	Not Called	Not Called	Not Called	Not Called	Lost	Not Called	Not Called	Not Called	Not Called	Not Called	Not Called	Not Called	Not Called	Lost	Not Called	Not Called	Not Called
TCGA-DU-7304	TCGA-DU-7304-01	OAST	Diffuse Glioma	Oligoastrocytoma	Oligoastrocytoma	G3	No	Yes	DU	CNS	3	Not Called	Not Called	Not Called	Not Called	Not Called	Not Called	Not Called	Not Called	Not Called	Not Called	Not Called	Not Called	Not Called	Not Called	Gained	Gained	Not Called	Not Called		Not Called	Not Called	Gained	Not Called	Not Called	Not Called	Not Called	Not Called	Not Called	Not Called	Not Called		Not Called	Not Called	Not Called	Not Called	Not Called	Not Called
TCGA-DU-7306	TCGA-DU-7306-01	OAST	Diffuse Glioma	Oligoastrocytoma	Oligoastrocytoma	G2	No	Yes	DU	CNS	2	Not Called	Not Called	Not Called	Not Called	Not Called	Not Called	Not Called	Not Called	Not Called	Not Called	Not Called	Not Called	Not Called		Not Called	Not Called		Not Called	Not Called	Not Called	Not Called		Not Called	Not Called	Not Called	Not Called	Gained	Not Called	Not Called	Not Called	Not Called		Not Called	Gained		Not Called	Not Called	Not Called
TCGA-DU-7309	TCGA-DU-7309-01	ODG	Diffuse Glioma	Oligodendroglioma	Oligodendroglioma	G3	Yes	No	DU	CNS	0	Not Called	Not Called	Not Called	Not Called	Not Called	Not Called	Not Called		Not Called	Not Called	Not Called	Not Called	Not Called	Not Called	Not Called	Not Called	Not Called	Not Called	Not Called	Not Called		Not Called	Not Called	Not Called	Not Called	Not Called	Not Called	Not Called	Not Called	Not Called	Not Called	Not Called	Not Called	Not Called		Not Called	Not Called	Not Called
TCGA-DU-8158	TCGA-DU-8158-01	DIFG	Diffuse Glioma	Astrocytoma	Astrocytoma	G3	No	Yes	DU	CNS	11	Lost		Not Called	Not Called	Not Called	Not Called	Not Called	Not Called	Not Called	Not Called	Lost	Lost	Not Called	Not Called	Not Called	Not Called	Not Called	Not Called	Lost	Lost	Not Called	Not Called	Not Called	Not Called	Lost	Lost	Lost	Not Called	Not Called	Not Called	Not Called	Lost	Lost	Not Called	Not Called	Not Called	Not Called	Not Called
TCGA-DU-8161	TCGA-DU-8161-01	OAST	Diffuse Glioma	Oligoastrocytoma	Oligoastrocytoma	G3	No	Yes	DU	CNS	9	Not Called	Not Called	Not Called	Not Called	Not Called	Not Called	Not Called	Not Called	Not Called	Not Called	Lost	Lost	Gained	Gained	Not Called	Not Called	Lost	Gained	Lost	Lost	Not Called	Not Called	Not Called	Not Called	Not Called	Lost	Not Called	Not Called	Not Called			Not Called	Not Called	Not Called	Not Called	Not Called	Not Called	Not Called
TCGA-DU-8162	TCGA-DU-8162-01	OAST	Diffuse Glioma	Oligoastrocytoma	Oligoastrocytoma	G3	Yes	No	DU	CNS	3		Gained	Not Called	Not Called	Not Called	Not Called	Not Called	Not Called	Not Called	Not Called	Not Called	Not Called	Not Called	Not Called	Not Called	Not Called	Not Called	Not Called	Not Called	Not Called	Not Called	Not Called	Not Called	Not Called	Not Called	Not Called	Not Called	Not Called	Not Called	Not Called	Not Called	Not Called	Not Called	Not Called	Not Called	Gained	Gained	Not Called
TCGA-DU-8163	TCGA-DU-8163-01	OAST	Diffuse Glioma	Oligoastrocytoma	Oligoastrocytoma	G3	Yes	No	DU	CNS	2	Not Called	Not Called	Not Called	Not Called	Not Called	Not Called	Not Called	Not Called	Not Called	Not Called	Not Called	Not Called	Gained	Gained	Not Called	Not Called	Not Called	Not Called	Not Called	Not Called	Not Called	Not Called	Not Called	Not Called	Not Called	Not Called	Not Called	Not Called	Not Called	Not Called	Not Called	Not Called	Not Called	Not Called	Not Called	Not Called	Not Called	Not Called
TCGA-DU-8164	TCGA-DU-8164-01	ODG	Diffuse Glioma	Oligodendroglioma	Oligodendroglioma	G2	Yes	No	DU	CNS	2	Lost	Not Called	Not Called	Not Called	Not Called	Not Called	Not Called	Not Called	Not Called	Not Called	Not Called	Not Called	Not Called	Not Called	Not Called	Not Called	Not Called	Not Called	Not Called	Not Called	Not Called	Not Called	Not Called	Not Called	Not Called	Not Called	Not Called	Not Called	Not Called	Not Called	Not Called	Not Called	Not Called	Not Called	Lost	Not Called	Not Called	Not Called
TCGA-DU-8165	TCGA-DU-8165-01	ODG	Diffuse Glioma	Oligodendroglioma	Oligodendroglioma	G3	Yes	No	DU	CNS	26	Gained	Gained	Not Called	Not Called	Not Called	Not Called	Lost	Lost	Lost	Lost	Not Called	Not Called	Gained	Gained	Not Called	Not Called	Gained	Gained	Lost	Lost	Lost	Lost	Not Called	Not Called	Lost	Lost	Not Called	Lost	Lost	Lost	Lost	Gained	Gained	Not Called	Not Called	Gained	Gained	Lost
TCGA-DU-8166	TCGA-DU-8166-01	OAST	Diffuse Glioma	Oligoastrocytoma	Oligoastrocytoma	G2	Yes	No	DU	CNS	3	Not Called	Not Called	Not Called	Not Called	Not Called	Not Called	Not Called	Not Called	Not Called	Not Called	Not Called	Not Called	Gained	Gained	Not Called	Not Called	Not Called	Not Called	Not Called	Not Called	Not Called	Not Called	Not Called	Not Called	Not Called	Not Called	Not Called	Not Called	Not Called	Not Called	Not Called	Not Called	Not Called	Not Called		Lost	Not Called	Not Called
TCGA-DU-8167	TCGA-DU-8167-01	OAST	Diffuse Glioma	Oligoastrocytoma	Oligoastrocytoma	G2	Yes	No	DU	CNS	5	Not Called	Not Called	Not Called	Not Called	Not Called	Lost	Not Called	Not Called	Not Called	Not Called	Not Called	Not Called	Not Called	Not Called	Not Called		Not Called	Not Called	Not Called			Not Called	Not Called	Lost	Lost	Not Called	Not Called	Not Called	Lost	Not Called	Not Called	Not Called	Not Called	Not Called	Not Called	Not Called	Not Called	Lost
TCGA-DU-8168	TCGA-DU-8168-01	ODG	Diffuse Glioma	Oligodendroglioma	Oligodendroglioma	G3	Yes	No	DU	CNS	2	Lost	Not Called	Not Called	Not Called		Not Called	Not Called	Not Called	Not Called	Not Called	Not Called	Not Called	Not Called	Not Called	Not Called	Not Called		Not Called	Not Called	Not Called	Not Called	Not Called	Not Called	Not Called	Not Called	Not Called	Not Called	Not Called	Not Called	Not Called	Not Called	Not Called	Not Called	Not Called	Lost	Not Called	Not Called	Not Called
TCGA-DU-A5TP	TCGA-DU-A5TP-01	DIFG	Diffuse Glioma	Astrocytoma	Astrocytoma	G3	Yes	No	DU	CNS	1	Not Called	Not Called	Not Called	Not Called	Not Called	Not Called	Not Called	Not Called	Not Called	Not Called	Not Called	Not Called	Not Called	Not Called	Not Called	Not Called	Not Called	Not Called	Not Called	Not Called	Not Called	Not Called		Not Called		Not Called	Not Called	Not Called	Not Called	Lost	Not Called		Not Called	Not Called		Not Called	Not Called	Not Called
TCGA-DU-A5TR	TCGA-DU-A5TR-01	OAST	Diffuse Glioma	Oligoastrocytoma	Oligoastrocytoma	G2	Yes	No	DU	CNS	5	Not Called	Not Called	Not Called	Not Called	Not Called	Not Called	Not Called	Not Called	Not Called	Not Called	Not Called	Not Called	Gained	Gained	Not Called	Not Called	Not Called	Not Called	Gained	Not Called	Lost	Not Called	Not Called	Not Called	Not Called	Not Called	Not Called	Not Called	Not Called	Not Called	Not Called	Lost	Not Called	Not Called	Not Called	Not Called	Not Called	Not Called
TCGA-DU-A5TS	TCGA-DU-A5TS-01	ODG	Diffuse Glioma	Oligodendroglioma	Oligodendroglioma	G2	Yes	No	DU	CNS	2	Not Called	Not Called		Not Called	Not Called	Not Called	Not Called		Not Called	Not Called	Not Called	Not Called	Not Called	Not Called	Not Called		Not Called	Not Called	Not Called	Not Called	Lost	Not Called	Gained	Not Called	Not Called	Not Called	Not Called	Not Called	Not Called	Not Called	Not Called	Not Called	Not Called	Not Called	Not Called	Not Called	Not Called	Not Called
TCGA-DU-A5TT	TCGA-DU-A5TT-01	ODG	Diffuse Glioma	Oligodendroglioma	Oligodendroglioma	G3	Yes	No	DU	CNS	30	Gained	Gained	Lost	Lost	Lost	Lost	Not Called	Not Called	Not Called	Not Called	Lost	Lost	Gained	Gained	Lost	Lost	Not Called	Not Called	Lost	Lost	Lost		Gained	Gained	Lost	Lost	Lost	Lost	Lost	Lost	Lost	Lost	Lost		Lost	Gained	Gained	Not Called
TCGA-DU-A5TU	TCGA-DU-A5TU-01	DIFG	Diffuse Glioma	Astrocytoma	Astrocytoma	G2	Yes	No	DU	CNS	3	Not Called	Not Called	Not Called	Not Called	Not Called	Not Called	Not Called		Not Called		Not Called	Not Called	Gained	Gained	Not Called	Not Called	Not Called	Not Called	Not Called	Not Called		Not Called	Gained			Not Called	Not Called	Not Called	Not Called	Not Called	Not Called	Not Called	Not Called	Not Called	Not Called	Not Called	Not Called	Not Called
TCGA-DU-A5TW	TCGA-DU-A5TW-01	DIFG	Diffuse Glioma	Astrocytoma	Astrocytoma	G3	Yes	No	DU	CNS	4	Not Called	Not Called	Not Called	Not Called	Not Called		Not Called	Not Called	Not Called	Not Called	Not Called	Not Called	Gained	Gained	Not Called		Not Called	Not Called	Not Called	Not Called	Not Called	Gained	Not Called	Not Called	Not Called	Not Called	Not Called	Not Called	Not Called	Gained	Not Called	Not Called	Not Called	Not Called	Not Called	Not Called	Not Called	Not Called
TCGA-DU-A5TY	TCGA-DU-A5TY-01	DIFG	Diffuse Glioma	Astrocytoma	Astrocytoma	G3	Yes	No	DU	CNS	13	Not Called	Not Called	Not Called	Not Called	Not Called	Not Called	Not Called	Not Called	Not Called	Not Called	Not Called	Not Called	Gained	Gained	Not Called	Not Called	Lost	Lost	Lost	Lost	Not Called	Not Called	Gained			Not Called	Not Called	Not Called	Not Called	Not Called	Not Called	Gained	Gained	Not Called	Not Called	Gained	Gained	Gained
TCGA-DU-A6S2	TCGA-DU-A6S2-01	ODG	Diffuse Glioma	Oligodendroglioma	Oligodendroglioma	G2	Yes	No	DU	CNS	2	Lost	Not Called	Not Called	Not Called	Not Called	Not Called	Not Called	Not Called	Not Called	Not Called	Not Called	Not Called	Not Called	Not Called	Not Called	Not Called	Not Called	Not Called	Not Called	Not Called	Not Called	Not Called	Not Called	Not Called	Not Called	Not Called	Not Called	Not Called	Not Called	Not Called	Not Called	Not Called	Not Called	Not Called	Lost	Not Called	Not Called	Not Called
TCGA-DU-A6S3	TCGA-DU-A6S3-01	ODG	Diffuse Glioma	Oligodendroglioma	Oligodendroglioma	G2	Yes	No	DU	CNS	2	Lost	Not Called	Not Called	Not Called	Not Called	Not Called	Not Called	Not Called	Not Called	Not Called	Not Called	Not Called	Not Called	Not Called	Not Called	Not Called	Not Called	Not Called	Not Called	Not Called	Not Called	Not Called	Not Called	Not Called	Not Called	Not Called	Not Called	Not Called	Not Called	Not Called	Not Called	Not Called	Not Called	Not Called	Lost	Not Called	Not Called	Not Called
TCGA-DU-A6S6	TCGA-DU-A6S6-01	OAST	Diffuse Glioma	Oligoastrocytoma	Oligoastrocytoma	G2	No	Yes	DU	CNS	2	Lost	Not Called	Not Called	Not Called	Not Called	Not Called	Not Called	Not Called	Not Called	Not Called	Not Called	Not Called	Not Called		Not Called	Not Called	Not Called	Not Called	Not Called	Not Called	Not Called	Not Called	Not Called	Not Called	Not Called	Not Called	Not Called	Not Called	Not Called	Not Called	Not Called	Not Called	Not Called	Not Called	Lost	Not Called	Not Called	Not Called
TCGA-DU-A6S7	TCGA-DU-A6S7-01	DIFG	Diffuse Glioma	Astrocytoma	Astrocytoma	G3	Yes	No	DU	CNS	6	Not Called	Not Called	Not Called		Not Called	Not Called	Not Called	Not Called	Not Called	Not Called	Not Called	Not Called	Not Called	Not Called	Gained	Gained	Not Called	Not Called	Not Called	Not Called	Not Called	Not Called	Not Called	Not Called	Not Called	Not Called	Not Called	Not Called	Not Called	Gained	Not Called	Not Called	Not Called	Not Called	Not Called	Gained	Gained	Gained
TCGA-DU-A6S8	TCGA-DU-A6S8-01	ODG	Diffuse Glioma	Oligodendroglioma	Oligodendroglioma	G3	Yes	No	DU	CNS	7	Lost	Not Called	Not Called	Not Called	Not Called	Not Called	Lost	Lost	Not Called	Not Called	Not Called	Not Called	Not Called	Not Called	Not Called	Not Called	Lost	Lost	Not Called	Not Called	Not Called	Not Called	Not Called	Not Called	Not Called	Lost	Not Called	Not Called	Not Called	Not Called	Not Called	Not Called	Not Called	Not Called	Lost	Not Called	Not Called	Not Called
TCGA-DU-A76K	TCGA-DU-A76K-01	ODG	Diffuse Glioma	Oligodendroglioma	Oligodendroglioma	G2	No	Yes	DU	CNS	10			Not Called	Not Called	Not Called		Not Called	Not Called	Not Called	Not Called	Not Called	Not Called	Gained	Gained	Not Called	Not Called		Not Called	Lost	Lost	Not Called	Not Called	Not Called	Not Called	Not Called	Not Called	Not Called	Not Called	Not Called	Not Called	Not Called	Not Called	Not Called	Gained	Gained	Gained	Gained	Gained
TCGA-DU-A76L	TCGA-DU-A76L-01	ODG	Diffuse Glioma	Oligodendroglioma	Oligodendroglioma	G3	No	Yes	DU	CNS	8	Not Called	Not Called	Not Called	Not Called	Not Called	Not Called	Not Called	Not Called	Not Called	Not Called	Not Called	Not Called	Gained	Gained	Not Called	Not Called	Not Called	Not Called	Lost	Lost	Not Called	Not Called	Not Called	Not Called	Not Called	Lost	Not Called	Not Called	Not Called	Not Called	Not Called	Not Called	Not Called	Not Called	Not Called	Gained	Gained	Not Called
TCGA-DU-A76O	TCGA-DU-A76O-01	DIFG	Diffuse Glioma	Astrocytoma	Astrocytoma	G2	Yes	No	DU	CNS	2	Not Called	Not Called	Not Called	Not Called	Not Called		Not Called	Not Called	Not Called	Not Called	Not Called	Not Called	Not Called		Not Called	Not Called	Gained	Gained	Not Called	Not Called	Not Called	Not Called	Not Called	Not Called	Not Called	Not Called	Not Called		Not Called	Not Called	Not Called	Not Called	Not Called	Not Called	Not Called	Not Called	Not Called	Not Called
TCGA-DU-A76R	TCGA-DU-A76R-01	ODG	Diffuse Glioma	Oligodendroglioma	Oligodendroglioma	G3	No	Yes	DU	CNS	3	Lost	Not Called	Not Called	Not Called	Not Called	Not Called	Not Called	Not Called	Not Called	Not Called	Not Called	Not Called	Not Called	Not Called	Not Called	Not Called	Not Called	Not Called	Not Called	Not Called	Not Called	Not Called	Not Called	Not Called	Lost	Not Called	Not Called	Not Called	Not Called	Not Called	Not Called	Not Called	Not Called	Not Called	Lost	Not Called	Not Called	Not Called
TCGA-DU-A7T6	TCGA-DU-A7T6-01	ODG	Diffuse Glioma	Oligodendroglioma	Oligodendroglioma	G3	No	Yes	DU	CNS	15	Lost	Not Called	Lost	Lost	Not Called	Not Called	Not Called	Not Called	Lost	Lost	Lost	Lost	Not Called	Not Called	Gained	Gained	Lost	Lost	Not Called	Not Called	Not Called	Not Called	Not Called	Not Called	Not Called	Not Called	Lost	Not Called	Not Called	Not Called	Not Called	Lost	Lost	Not Called	Lost	Not Called	Not Called	Not Called
TCGA-DU-A7T8	TCGA-DU-A7T8-01	OAST	Diffuse Glioma	Oligoastrocytoma	Oligoastrocytoma	G3	No	Yes	DU	CNS	1	Not Called	Not Called	Not Called	Not Called	Not Called	Not Called	Lost	Not Called	Not Called	Not Called	Not Called	Not Called	Not Called		Not Called		Not Called	Not Called	Not Called	Not Called	Not Called	Not Called	Not Called	Not Called	Not Called	Not Called	Not Called	Not Called	Not Called	Not Called	Not Called	Not Called	Not Called	Not Called	Not Called	Not Called	Not Called	Not Called
TCGA-DU-A7TA	TCGA-DU-A7TA-01	ODG	Diffuse Glioma	Oligodendroglioma	Oligodendroglioma	G2	No	Yes	DU	CNS	10	Not Called		Not Called	Not Called		Not Called	Not Called	Lost	Not Called	Not Called	Not Called	Not Called	Gained	Gained	Gained	Gained	Lost	Lost	Not Called	Not Called	Not Called	Not Called		Gained	Lost	Not Called	Not Called	Not Called	Not Called	Not Called	Not Called	Not Called	Not Called	Not Called		Not Called	Not Called	Lost
TCGA-DU-A7TB	TCGA-DU-A7TB-01	ODG	Diffuse Glioma	Oligodendroglioma	Oligodendroglioma	G2	Yes	No	DU	CNS	1	Not Called	Gained	Not Called	Not Called	Not Called	Not Called	Not Called	Not Called	Not Called	Not Called	Not Called	Not Called	Not Called	Not Called	Not Called	Not Called	Not Called	Not Called	Not Called	Not Called	Not Called	Not Called	Not Called	Not Called	Not Called	Not Called	Not Called	Not Called	Not Called	Not Called	Not Called	Not Called	Not Called	Not Called		Not Called	Not Called	Not Called
TCGA-DU-A7TC	TCGA-DU-A7TC-01	DIFG	Diffuse Glioma	Astrocytoma	Astrocytoma	G2	Yes	No	DU	CNS	3	Not Called	Not Called	Not Called	Not Called	Not Called	Not Called	Not Called		Not Called	Not Called	Not Called	Lost	Not Called	Not Called			Not Called	Not Called	Not Called	Not Called	Not Called	Not Called	Not Called	Not Called	Not Called	Not Called	Gained	Not Called	Not Called	Not Called	Not Called	Not Called	Not Called	Not Called	Lost	Not Called	Not Called	Not Called
TCGA-DU-A7TD	TCGA-DU-A7TD-01	OAST	Diffuse Glioma	Oligoastrocytoma	Oligoastrocytoma	G3	Yes	No	DU	CNS	6	Not Called	Not Called	Not Called	Not Called	Not Called	Not Called	Not Called	Not Called	Not Called	Not Called	Not Called	Not Called	Gained	Gained	Not Called	Not Called	Lost	Lost	Lost	Lost	Not Called	Not Called	Not Called	Not Called	Not Called	Not Called	Not Called	Not Called	Not Called	Not Called	Not Called	Not Called	Not Called	Not Called	Not Called	Not Called	Not Called	Not Called
TCGA-DU-A7TG	TCGA-DU-A7TG-01	ODG	Diffuse Glioma	Oligodendroglioma	Oligodendroglioma	G2	No	Yes	DU	CNS	2	Lost	Not Called	Not Called	Not Called	Not Called	Not Called	Not Called	Not Called	Not Called	Not Called	Not Called	Not Called	Not Called	Not Called	Not Called	Not Called	Not Called	Not Called	Not Called	Not Called	Not Called	Not Called	Not Called	Not Called	Not Called	Not Called	Not Called	Not Called	Not Called	Not Called	Not Called	Not Called	Not Called	Not Called	Lost	Not Called	Not Called	Not Called
TCGA-DU-A7TI	TCGA-DU-A7TI-01	DIFG	Diffuse Glioma	Astrocytoma	Astrocytoma	G3	No	Yes	DU	CNS	1	Not Called	Not Called	Not Called	Not Called	Not Called	Not Called	Not Called	Not Called	Not Called	Not Called	Not Called	Not Called	Not Called		Not Called		Not Called	Not Called	Not Called	Not Called	Not Called	Not Called	Gained	Not Called		Not Called	Not Called	Not Called	Not Called	Not Called	Not Called	Not Called	Not Called	Not Called	Not Called	Not Called	Not Called	Not Called
TCGA-DU-A7TJ	TCGA-DU-A7TJ-01	DIFG	Diffuse Glioma	Astrocytoma	Astrocytoma	G3	Yes	No	DU	CNS	5	Not Called	Not Called	Not Called	Not Called	Not Called	Not Called	Not Called	Not Called	Not Called	Not Called	Not Called	Not Called	Gained	Gained	Lost	Not Called		Not Called	Lost	Lost		Not Called	Not Called	Not Called	Not Called	Not Called	Not Called	Not Called	Not Called	Not Called	Not Called	Not Called	Not Called			Not Called		Not Called
TCGA-E1-5302	TCGA-E1-5302-01	DIFG	Diffuse Glioma	Astrocytoma	Astrocytoma	G3	No	Yes	E1	CNS	1	Not Called		Not Called	Not Called	Not Called	Not Called	Not Called	Not Called	Lost	Not Called	Not Called	Not Called	Not Called		Not Called	Not Called	Not Called	Not Called	Not Called	Not Called		Not Called	Not Called	Not Called	Not Called	Not Called	Not Called	Not Called	Not Called	Not Called	Not Called	Not Called	Not Called	Not Called		Not Called	Not Called	Not Called
TCGA-E1-5303	TCGA-E1-5303-01	DIFG	Diffuse Glioma	Astrocytoma	Astrocytoma	G3	No	Yes	E1	CNS	2	Not Called	Not Called	Not Called	Not Called	Not Called	Not Called	Not Called	Not Called	Not Called	Not Called	Not Called	Not Called	Not Called	Not Called	Gained	Gained	Not Called	Not Called	Not Called	Not Called	Not Called	Not Called		Not Called		Not Called	Not Called	Not Called	Not Called	Not Called	Not Called	Not Called	Not Called	Not Called	Not Called	Not Called	Not Called	Not Called
TCGA-E1-5304	TCGA-E1-5304-01	DIFG	Diffuse Glioma	Astrocytoma	Astrocytoma	G3	No	Yes	E1	CNS	22	Gained	Not Called	Gained	Gained			Not Called	Not Called	Gained	Not Called	Not Called	Lost	Gained	Gained	Not Called		Lost		Gained	Not Called	Lost	Gained	Gained	Not Called			Gained	Not Called	Gained	Gained	Gained	Gained	Gained	Gained	Not Called	Gained	Gained
TCGA-E1-5305	TCGA-E1-5305-01	DIFG	Diffuse Glioma	Astrocytoma	Astrocytoma	G3	No	Yes	E1	CNS	2	Not Called	Not Called	Not Called	Not Called	Not Called	Not Called	Not Called	Not Called	Not Called		Not Called	Lost	Not Called	Not Called	Not Called		Not Called	Not Called	Not Called	Not Called	Not Called	Not Called	Not Called		Not Called		Not Called	Not Called	Not Called	Not Called	Not Called	Not Called	Not Called	Not Called	Lost	Not Called	Not Called	Not Called
TCGA-E1-5307	TCGA-E1-5307-01	DIFG	Diffuse Glioma	Astrocytoma	Astrocytoma	G3	No	Yes	E1	CNS	7	Not Called	Not Called	Not Called	Not Called	Not Called	Not Called				Lost	Not Called	Lost	Not Called	Not Called			Lost	Lost	Not Called	Not Called	Not Called	Not Called	Not Called	Not Called			Not Called	Not Called	Not Called	Not Called	Not Called	Lost	Lost	Not Called	Not Called	Not Called	Not Called	Lost
TCGA-E1-5311	TCGA-E1-5311-01	ODG	Diffuse Glioma	Oligodendroglioma	Oligodendroglioma	G3	No	Yes	E1	CNS	3	Lost	Not Called	Not Called	Not Called	Not Called	Not Called	Not Called	Not Called	Not Called	Not Called	Not Called	Not Called	Not Called	Not Called	Not Called	Not Called	Not Called	Not Called	Not Called	Not Called	Not Called	Not Called	Not Called	Not Called	Not Called	Not Called	Lost	Not Called	Not Called	Not Called	Not Called	Not Called	Not Called	Not Called	Lost	Not Called	Not Called	Not Called
TCGA-E1-5318	TCGA-E1-5318-01	ODG	Diffuse Glioma	Oligodendroglioma	Oligodendroglioma	G2	No	Yes	E1	CNS	2	Lost	Not Called	Not Called	Not Called	Not Called	Not Called	Not Called	Not Called	Not Called	Not Called	Not Called	Not Called	Not Called	Not Called	Not Called	Not Called	Not Called	Not Called	Not Called	Not Called	Not Called	Not Called	Not Called	Not Called	Not Called	Not Called	Not Called	Not Called	Not Called	Not Called	Not Called	Not Called	Not Called	Not Called	Lost	Not Called	Not Called	Not Called
TCGA-E1-5319	TCGA-E1-5319-01	ODG	Diffuse Glioma	Oligodendroglioma	Oligodendroglioma	G2	No	Yes	E1	CNS	2	Lost	Not Called	Not Called	Not Called	Not Called	Not Called	Not Called	Not Called	Not Called	Not Called	Not Called	Not Called	Not Called	Not Called	Not Called	Not Called	Not Called	Not Called	Not Called	Not Called	Not Called	Not Called	Not Called	Not Called	Not Called		Not Called	Not Called	Not Called	Not Called	Not Called	Not Called	Not Called	Not Called	Lost	Not Called	Not Called	Not Called
TCGA-E1-5322	TCGA-E1-5322-01	OAST	Diffuse Glioma	Oligoastrocytoma	Oligoastrocytoma	G2	No	Yes	E1	CNS	3	Not Called	Not Called	Not Called	Not Called		Not Called	Not Called		Not Called	Not Called	Not Called		Not Called	Not Called	Not Called	Not Called	Not Called	Not Called	Gained	Not Called	Not Called	Not Called	Not Called	Not Called	Not Called	Lost	Not Called	Not Called	Not Called	Not Called	Not Called	Not Called	Not Called	Not Called	Lost	Not Called	Not Called	Not Called
TCGA-E1-A7YD	TCGA-E1-A7YD-01	DIFG	Diffuse Glioma	Astrocytoma	Astrocytoma	G3	No	Yes	E1	CNS	19	Gained	Gained	Gained	Gained	Not Called	Not Called	Not Called	Gained	Gained	Gained	Not Called	Not Called	Gained	Gained	Not Called		Lost	Lost	Lost	Lost	Not Called	Not Called	Not Called	Not Called	Lost	Lost		Gained	Gained	Gained	Gained	Not Called	Not Called	Not Called	Not Called	Not Called		Not Called
TCGA-E1-A7YE	TCGA-E1-A7YE-01	DIFG	Diffuse Glioma	Astrocytoma	Astrocytoma	G3	No	Yes	E1	CNS	4	Not Called	Not Called	Not Called		Not Called	Not Called	Not Called	Not Called	Not Called		Not Called	Not Called	Not Called	Not Called	Not Called	Not Called	Lost	Lost	Not Called	Not Called	Lost	Not Called	Not Called	Not Called	Lost	Not Called	Not Called	Not Called	Not Called		Not Called	Not Called	Not Called	Not Called		Not Called	Not Called
TCGA-E1-A7YH	TCGA-E1-A7YH-01	DIFG	Diffuse Glioma	Astrocytoma	Astrocytoma	G3	No	Yes	E1	CNS	0	Not Called	Not Called	Not Called	Not Called	Not Called	Not Called	Not Called	Not Called	Not Called	Not Called	Not Called	Not Called	Not Called	Not Called	Not Called	Not Called	Not Called	Not Called	Not Called	Not Called	Not Called	Not Called	Not Called		Not Called	Not Called	Not Called	Not Called	Not Called	Not Called	Not Called	Not Called	Not Called	Not Called	Not Called	Not Called	Not Called	Not Called
TCGA-E1-A7YI	TCGA-E1-A7YI-01	DIFG	Diffuse Glioma	Astrocytoma	Astrocytoma	G3	No	Yes	E1	CNS	3	Not Called	Not Called	Not Called	Not Called	Not Called	Not Called	Not Called	Not Called	Not Called	Not Called		Not Called	Not Called	Not Called	Not Called				Gained	Not Called	Lost	Not Called	Gained	Not Called		Not Called	Not Called	Not Called	Not Called	Not Called	Not Called	Not Called	Not Called	Not Called	Not Called	Not Called	Not Called	Not Called
TCGA-E1-A7YJ	TCGA-E1-A7YJ-01	DIFG	Diffuse Glioma	Astrocytoma	Astrocytoma	G3	No	Yes	E1	CNS	9	Not Called	Not Called	Not Called	Not Called	Lost	Not Called	Not Called	Not Called	Not Called	Not Called	Not Called	Not Called	Gained	Not Called	Not Called	Not Called	Lost	Not Called	Lost	Lost	Not Called	Not Called	Not Called	Not Called	Not Called	Not Called	Not Called	Not Called	Not Called	Not Called	Not Called	Not Called	Not Called	Gained	Gained	Gained	Gained	Not Called
TCGA-E1-A7YK	TCGA-E1-A7YK-01	DIFG	Diffuse Glioma	Astrocytoma	Astrocytoma	G3	No	Yes	E1	CNS	7	Not Called	Not Called					Not Called	Lost	Not Called		Not Called	Lost	Not Called	Not Called	Not Called	Not Called	Not Called	Not Called	Gained	Not Called	Lost	Not Called	Not Called	Lost	Not Called	Not Called		Not Called	Not Called	Not Called	Not Called	Not Called	Not Called		Lost	Not Called	Not Called	Lost
TCGA-E1-A7YL	TCGA-E1-A7YL-01	DIFG	Diffuse Glioma	Astrocytoma	Astrocytoma	G3	No	Yes	E1	CNS	11	Not Called	Not Called	Not Called	Not Called	Not Called	Not Called	Not Called	Not Called	Not Called	Not Called	Not Called	Not Called	Gained	Gained	Not Called	Not Called	Not Called	Not Called	Lost	Lost	Lost	Lost	Not Called	Not Called	Lost		Not Called	Not Called	Not Called	Not Called	Not Called	Lost		Gained		Gained	Gained	Not Called
TCGA-E1-A7YM	TCGA-E1-A7YM-01	DIFG	Diffuse Glioma	Astrocytoma	Astrocytoma	G3	No	Yes	E1	CNS	6	Not Called	Not Called	Not Called	Not Called	Not Called	Not Called	Not Called	Not Called	Not Called	Not Called	Not Called	Not Called	Gained	Gained	Not Called	Not Called		Not Called	Lost	Lost	Not Called	Not Called	Not Called	Not Called	Not Called	Lost	Not Called	Not Called	Not Called	Not Called	Not Called	Not Called	Not Called	Not Called	Not Called	Not Called	Not Called	Not Called
TCGA-E1-A7YN	TCGA-E1-A7YN-01	DIFG	Diffuse Glioma	Astrocytoma	Astrocytoma	G3	No	Yes	E1	CNS	5	Not Called	Not Called	Not Called	Not Called	Not Called	Not Called	Not Called	Not Called	Not Called	Not Called	Not Called	Not Called	Gained	Gained	Not Called	Not Called		Lost	Lost	Lost	Not Called	Not Called	Not Called	Not Called	Not Called	Not Called		Not Called	Not Called	Not Called	Not Called	Not Called	Not Called	Not Called	Not Called	Not Called	Not Called	Not Called
TCGA-E1-A7YO	TCGA-E1-A7YO-01	ODG	Diffuse Glioma	Oligodendroglioma	Oligodendroglioma	G3	No	Yes	E1	CNS	2	Lost	Not Called	Not Called	Not Called	Not Called	Not Called	Not Called	Not Called	Not Called	Not Called	Not Called	Not Called	Not Called	Not Called	Not Called	Not Called	Not Called	Not Called	Not Called	Not Called	Not Called	Not Called	Not Called	Not Called	Not Called	Not Called	Not Called	Not Called	Not Called	Not Called	Not Called	Not Called	Not Called	Not Called	Lost	Not Called	Not Called	Not Called
TCGA-E1-A7YQ	TCGA-E1-A7YQ-01	ODG	Diffuse Glioma	Oligodendroglioma	Oligodendroglioma	G3	No	Yes	E1	CNS	28	Not Called	Gained	Not Called	Not Called	Lost	Lost	Gained	Lost	Gained	Gained	Lost	Lost	Gained	Gained	Lost	Lost	Lost	Lost	Lost	Lost	Not Called	Not Called	Gained	Gained	Lost	Lost	Gained	Lost	Lost	Not Called	Not Called	Not Called	Not Called	Not Called	Not Called	Gained	Gained	Gained
TCGA-E1-A7YS	TCGA-E1-A7YS-01	ODG	Diffuse Glioma	Oligodendroglioma	Oligodendroglioma	G3	No	Yes	E1	CNS	24	Lost	Gained	Gained	Gained		Gained	Not Called	Not Called	Gained	Gained	Not Called	Not Called	Gained	Gained	Gained	Gained	Not Called	Not Called	Gained		Gained	Gained	Not Called	Not Called	Not Called	Not Called	Lost	Gained	Gained	Gained	Gained	Not Called	Not Called	Gained	Lost	Gained	Gained	Gained
TCGA-E1-A7YU	TCGA-E1-A7YU-01	OAST	Diffuse Glioma	Oligoastrocytoma	Oligoastrocytoma	G3	No	Yes	E1	CNS	0	Not Called	Not Called	Not Called	Not Called		Not Called	Not Called	Not Called	Not Called	Not Called	Not Called	Not Called	Not Called	Not Called	Not Called	Not Called	Not Called	Not Called		Not Called	Not Called	Not Called		Not Called	Not Called	Not Called	Not Called	Not Called	Not Called	Not Called	Not Called	Not Called	Not Called	Not Called			Not Called	Not Called
TCGA-E1-A7YV	TCGA-E1-A7YV-01	OAST	Diffuse Glioma	Oligoastrocytoma	Oligoastrocytoma	G3	No	Yes	E1	CNS	10	Not Called		Gained	Gained	Lost	Lost	Not Called	Not Called	Not Called	Not Called	Not Called	Not Called	Not Called	Not Called	Lost			Not Called	Not Called		Lost	Not Called	Lost	Lost	Not Called			Not Called	Not Called	Not Called	Not Called	Gained	Gained	Not Called	Not Called	Not Called	Not Called
TCGA-E1-A7YW	TCGA-E1-A7YW-01	OAST	Diffuse Glioma	Oligoastrocytoma	Oligoastrocytoma	G2	No	Yes	E1	CNS	2	Not Called	Not Called	Not Called	Not Called	Lost	Not Called	Not Called	Not Called	Not Called	Not Called	Not Called	Not Called	Not Called	Not Called	Not Called		Not Called	Not Called	Gained	Not Called	Not Called	Not Called		Not Called	Not Called	Not Called	Not Called	Not Called	Not Called	Not Called	Not Called	Not Called	Not Called	Not Called	Not Called		Not Called	Not Called
TCGA-E1-A7YY	TCGA-E1-A7YY-01	ODG	Diffuse Glioma	Oligodendroglioma	Oligodendroglioma	G2	No	Yes	E1	CNS	2	Lost	Not Called	Not Called	Not Called	Not Called	Not Called	Not Called	Not Called	Not Called	Not Called	Not Called	Not Called	Not Called	Not Called	Not Called		Not Called	Not Called	Not Called	Not Called	Not Called	Not Called	Not Called	Not Called		Not Called	Not Called	Not Called	Not Called	Not Called	Not Called	Not Called	Not Called	Not Called	Lost	Not Called	Not Called	Not Called
TCGA-E1-A7Z2	TCGA-E1-A7Z2-01	ODG	Diffuse Glioma	Oligodendroglioma	Oligodendroglioma	G2	No	Yes	E1	CNS	7	Not Called	Not Called	Not Called	Not Called	Not Called	Not Called	Not Called	Not Called	Not Called	Not Called	Not Called	Lost	Gained	Not Called	Not Called	Not Called		Not Called		Lost	Not Called	Not Called	Not Called	Not Called	Not Called	Lost	Not Called	Not Called		Not Called	Not Called	Not Called	Not Called	Not Called	Not Called	Gained	Gained	Not Called
TCGA-E1-A7Z3	TCGA-E1-A7Z3-01	DIFG	Diffuse Glioma	Astrocytoma	Astrocytoma	G2	No	Yes	E1	CNS	1	Not Called	Not Called	Not Called	Not Called	Not Called	Not Called	Not Called	Not Called	Not Called	Not Called	Not Called	Not Called	Not Called		Not Called	Not Called	Not Called	Gained	Not Called	Not Called	Not Called	Not Called	Not Called	Not Called	Not Called	Not Called	Not Called	Not Called	Not Called	Not Called	Not Called	Not Called	Not Called	Not Called	Not Called	Not Called	Not Called	Not Called
TCGA-E1-A7Z4	TCGA-E1-A7Z4-01	DIFG	Diffuse Glioma	Astrocytoma	Astrocytoma	G2	No	Yes	E1	CNS	1	Not Called	Not Called	Not Called	Not Called	Not Called	Not Called	Not Called	Not Called	Lost		Not Called	Not Called	Not Called	Not Called	Not Called	Not Called	Not Called	Not Called	Not Called	Not Called	Not Called	Not Called	Not Called	Not Called	Not Called	Not Called	Not Called	Not Called	Not Called	Not Called	Not Called	Not Called	Not Called	Not Called		Not Called	Not Called	Not Called
TCGA-E1-A7Z6	TCGA-E1-A7Z6-01	DIFG	Diffuse Glioma	Astrocytoma	Astrocytoma	G2	No	Yes	E1	CNS	1	Not Called	Not Called	Not Called	Not Called	Not Called		Not Called	Not Called	Not Called	Not Called	Not Called	Not Called	Not Called		Not Called	Not Called	Gained	Not Called	Not Called	Not Called	Not Called	Not Called	Not Called	Not Called	Not Called	Not Called	Not Called	Not Called	Not Called	Not Called	Not Called	Not Called	Not Called	Not Called	Not Called	Not Called	Not Called	Not Called
TCGA-EZ-7264	TCGA-EZ-7264-01	ODG	Diffuse Glioma	Oligodendroglioma	Oligodendroglioma	G2	Yes	No	EZ	CNS	5	Lost	Not Called	Not Called	Not Called	Not Called	Not Called	Not Called	Lost	Not Called	Not Called	Not Called	Not Called	Not Called	Not Called	Not Called	Not Called	Lost	Lost	Not Called	Not Called	Not Called	Not Called	Not Called	Not Called	Not Called		Not Called	Not Called	Not Called	Not Called	Not Called	Not Called	Not Called	Not Called	Lost	Not Called	Not Called	Not Called
TCGA-F6-A8O3	TCGA-F6-A8O3-01	ODG	Diffuse Glioma	Oligodendroglioma	Oligodendroglioma	G2	Yes	No	F6	CNS	4	Lost	Not Called	Not Called	Not Called	Not Called	Not Called	Lost	Lost	Not Called	Not Called	Not Called	Not Called	Not Called	Not Called	Not Called	Not Called	Not Called	Not Called	Not Called	Not Called	Not Called	Not Called	Not Called	Not Called	Not Called	Not Called	Not Called	Not Called	Not Called	Not Called	Not Called	Not Called	Not Called	Not Called	Lost	Not Called	Not Called	Not Called
TCGA-F6-A8O4	TCGA-F6-A8O4-01	DIFG	Diffuse Glioma	Astrocytoma	Astrocytoma	G2	Yes	No	F6	CNS	0	Not Called	Not Called	Not Called	Not Called	Not Called	Not Called	Not Called	Not Called	Not Called	Not Called	Not Called	Not Called	Not Called		Not Called	Not Called		Not Called	Not Called	Not Called	Not Called	Not Called	Not Called	Not Called	Not Called	Not Called	Not Called	Not Called	Not Called	Not Called		Not Called	Not Called	Not Called	Not Called	Not Called	Not Called	Not Called
TCGA-FG-5962	TCGA-FG-5962-01	ODG	Diffuse Glioma	Oligodendroglioma	Oligodendroglioma	G3	No	Yes	FG	CNS	3	Lost	Not Called	Not Called	Not Called	Not Called	Not Called	Not Called	Not Called	Not Called	Not Called	Not Called	Not Called	Not Called	Not Called	Not Called	Not Called	Not Called	Not Called	Not Called	Not Called	Not Called	Not Called	Not Called	Not Called	Lost	Not Called	Not Called	Not Called	Not Called	Not Called	Not Called	Not Called	Not Called	Not Called	Lost	Not Called	Not Called	Not Called
TCGA-FG-5963	TCGA-FG-5963-01	DIFG	Diffuse Glioma	Astrocytoma	Astrocytoma	G3	No	Yes	FG	CNS	5	Not Called	Not Called	Not Called			Lost	Not Called	Lost	Gained	Lost			Not Called	Not Called	Not Called	Not Called		Not Called	Not Called	Not Called			Not Called	Not Called	Lost		Not Called	Not Called	Not Called	Not Called	Not Called	Not Called	Not Called	Not Called	Not Called	Not Called	Not Called	Not Called
TCGA-FG-5964	TCGA-FG-5964-01	ODG	Diffuse Glioma	Oligodendroglioma	Oligodendroglioma	G2	No	Yes	FG	CNS	5	Lost	Not Called	Not Called	Not Called	Not Called	Not Called	Lost	Lost	Not Called	Not Called	Not Called	Not Called	Not Called	Not Called	Not Called			Not Called	Not Called	Not Called	Not Called	Not Called	Not Called	Not Called	Lost	Not Called	Not Called	Not Called	Not Called	Not Called	Not Called	Not Called	Not Called	Not Called	Lost	Not Called	Not Called	Not Called
TCGA-FG-5965	TCGA-FG-5965-01	OAST	Diffuse Glioma	Oligoastrocytoma	Oligoastrocytoma	G2	No	Yes	FG	CNS	2	Not Called	Not Called	Not Called	Not Called	Not Called	Not Called	Not Called	Not Called	Lost	Not Called	Not Called	Not Called	Not Called	Gained	Not Called	Not Called		Not Called	Not Called	Not Called		Not Called		Not Called	Not Called	Not Called	Not Called	Not Called	Not Called	Not Called	Not Called	Not Called	Not Called	Not Called		Not Called	Not Called	Not Called
TCGA-FG-6688	TCGA-FG-6688-01	DIFG	Diffuse Glioma	Astrocytoma	Astrocytoma	G3	Yes	No	FG	CNS	4	Not Called	Not Called	Not Called	Not Called	Not Called	Not Called	Not Called	Not Called	Not Called	Not Called	Not Called	Not Called	Gained	Gained	Not Called	Not Called	Not Called	Not Called	Lost	Lost	Not Called	Not Called	Not Called	Not Called		Not Called		Not Called	Not Called	Not Called	Not Called	Not Called	Not Called	Not Called	Not Called	Not Called	Not Called	Not Called
TCGA-FG-6689	TCGA-FG-6689-01	DIFG	Diffuse Glioma	Astrocytoma	Astrocytoma	G2	Yes	No	FG	CNS	3	Not Called	Not Called	Not Called	Not Called	Not Called	Not Called	Not Called	Not Called	Lost	Not Called	Not Called	Not Called	Not Called	Not Called	Not Called	Not Called	Not Called	Not Called	Not Called	Not Called	Lost	Not Called	Not Called	Lost	Not Called	Not Called	Not Called	Not Called	Not Called	Not Called	Not Called	Not Called	Not Called	Not Called	Not Called	Not Called	Not Called	Not Called
TCGA-FG-6690	TCGA-FG-6690-01	ODG	Diffuse Glioma	Oligodendroglioma	Oligodendroglioma	G2	Yes	No	FG	CNS	0	Not Called	Not Called	Not Called	Not Called	Not Called	Not Called	Not Called	Not Called	Not Called	Not Called	Not Called	Not Called	Not Called		Not Called	Not Called	Not Called	Not Called	Not Called	Not Called	Not Called	Not Called	Not Called	Not Called	Not Called	Not Called	Not Called	Not Called	Not Called	Not Called	Not Called	Not Called	Not Called	Not Called	Not Called	Not Called	Not Called	Not Called
TCGA-FG-6691	TCGA-FG-6691-01	DIFG	Diffuse Glioma	Astrocytoma	Astrocytoma	G2	Yes	No	FG	CNS	3	Not Called	Not Called	Not Called	Not Called	Not Called	Not Called	Not Called	Not Called	Not Called	Not Called	Not Called	Not Called	Gained	Gained	Not Called	Gained	Not Called	Not Called	Not Called	Not Called	Not Called	Not Called		Not Called	Not Called	Not Called	Not Called	Not Called	Not Called	Not Called	Not Called	Not Called	Not Called	Not Called	Not Called	Not Called	Not Called	Not Called
TCGA-FG-6692	TCGA-FG-6692-01	ODG	Diffuse Glioma	Oligodendroglioma	Oligodendroglioma	G3	Yes	No	FG	CNS	7	Not Called	Not Called	Not Called	Not Called	Not Called	Not Called	Not Called	Not Called	Not Called	Not Called	Not Called	Not Called	Gained	Gained	Not Called	Not Called	Lost	Not Called	Lost	Lost	Not Called	Not Called	Not Called	Not Called	Not Called	Not Called	Not Called	Not Called	Not Called	Not Called	Not Called	Not Called	Not Called	Gained	Gained	Not Called	Not Called	Not Called
TCGA-FG-7634	TCGA-FG-7634-01	ODG	Diffuse Glioma	Oligodendroglioma	Oligodendroglioma	G2	Yes	No	FG	CNS	2	Lost	Not Called	Not Called	Not Called	Not Called	Not Called	Not Called	Not Called	Not Called	Not Called	Not Called	Not Called	Not Called	Not Called	Not Called	Not Called	Not Called	Not Called	Not Called	Not Called	Not Called	Not Called	Not Called	Not Called	Not Called	Not Called	Not Called	Not Called	Not Called	Not Called	Not Called	Not Called	Not Called	Not Called	Lost	Not Called	Not Called	Not Called
TCGA-FG-7636	TCGA-FG-7636-01	DIFG	Diffuse Glioma	Astrocytoma	Astrocytoma	G3	Yes	No	FG	CNS	3	Not Called	Not Called	Not Called	Not Called	Not Called		Not Called	Not Called	Not Called	Not Called	Not Called	Lost	Not Called	Not Called	Not Called	Not Called	Lost	Not Called	Not Called	Not Called	Not Called	Not Called	Not Called	Not Called	Not Called	Not Called	Not Called	Not Called	Not Called	Not Called	Not Called	Not Called	Not Called	Not Called	Lost	Not Called	Not Called	Not Called
TCGA-FG-7637	TCGA-FG-7637-01	OAST	Diffuse Glioma	Oligoastrocytoma	Oligoastrocytoma	G2	Yes	No	FG	CNS
TCGA-FG-7638	TCGA-FG-7638-01	ODG	Diffuse Glioma	Oligodendroglioma	Oligodendroglioma	G3	Yes	No	FG	CNS	2	Lost	Not Called	Not Called	Not Called	Not Called	Not Called	Not Called	Not Called	Not Called	Not Called	Not Called	Not Called	Not Called	Not Called	Not Called	Not Called	Not Called	Not Called	Not Called	Not Called	Not Called	Not Called	Not Called	Not Called	Not Called	Not Called	Not Called	Not Called	Not Called	Not Called	Not Called	Not Called	Not Called	Not Called	Lost	Not Called	Not Called	Not Called
TCGA-FG-7641	TCGA-FG-7641-01	ODG	Diffuse Glioma	Oligodendroglioma	Oligodendroglioma	G2	Yes	No	FG	CNS	3	Lost	Not Called	Not Called	Not Called	Not Called	Not Called	Not Called	Not Called	Not Called	Not Called	Not Called	Not Called	Not Called	Not Called	Not Called	Not Called	Not Called	Not Called	Not Called	Not Called	Not Called	Not Called	Not Called	Not Called	Lost	Not Called	Not Called	Not Called	Not Called	Not Called	Not Called	Not Called	Not Called	Not Called	Lost	Not Called	Not Called	Not Called
TCGA-FG-7643	TCGA-FG-7643-01	OAST	Diffuse Glioma	Oligoastrocytoma	Oligoastrocytoma	G2	Yes	No	FG	CNS	7	Not Called	Not Called	Not Called	Not Called	Not Called	Not Called	Not Called	Not Called	Not Called	Not Called	Not Called	Not Called	Gained	Gained	Not Called	Not Called	Not Called	Not Called	Lost	Lost	Not Called	Not Called	Not Called	Not Called	Not Called	Lost	Not Called	Not Called	Not Called	Not Called	Not Called	Not Called	Not Called	Gained	Gained	Not Called	Not Called	Not Called
TCGA-FG-8181	TCGA-FG-8181-01	OAST	Diffuse Glioma	Oligoastrocytoma	Oligoastrocytoma	G3	Yes	No	FG	CNS	0	Not Called	Not Called	Not Called	Not Called	Not Called	Not Called	Not Called	Not Called	Not Called	Not Called	Not Called	Not Called	Not Called	Not Called	Not Called	Not Called	Not Called	Not Called	Not Called	Not Called	Not Called	Not Called	Not Called	Not Called	Not Called	Not Called	Not Called	Not Called	Not Called	Not Called	Not Called	Not Called	Not Called	Not Called	Not Called	Not Called	Not Called	Not Called
TCGA-FG-8182	TCGA-FG-8182-01	ODG	Diffuse Glioma	Oligodendroglioma	Oligodendroglioma	G2	Yes	No	FG	CNS	2	Not Called	Not Called	Not Called	Not Called	Not Called	Not Called	Not Called	Not Called	Not Called	Not Called	Not Called	Not Called	Gained	Gained	Not Called	Not Called	Not Called	Not Called	Not Called	Not Called	Not Called	Not Called		Not Called	Not Called	Not Called	Not Called	Not Called	Not Called	Not Called	Not Called	Not Called	Not Called	Not Called	Not Called	Not Called	Not Called	Not Called
TCGA-FG-8185	TCGA-FG-8185-01	DIFG	Diffuse Glioma	Astrocytoma	Astrocytoma	G3	Yes	No	FG	CNS	1	Not Called		Not Called	Not Called	Not Called	Not Called	Not Called		Not Called	Not Called	Not Called	Not Called	Not Called	Not Called	Not Called	Not Called		Not Called	Gained	Not Called	Not Called	Not Called		Not Called	Not Called	Not Called	Not Called	Not Called	Not Called	Not Called	Not Called	Not Called	Not Called	Not Called	Not Called	Not Called	Not Called	Not Called
TCGA-FG-8186	TCGA-FG-8186-01	OAST	Diffuse Glioma	Oligoastrocytoma	Oligoastrocytoma	G3	Yes	No	FG	CNS	2	Lost	Not Called	Not Called	Not Called	Not Called	Not Called	Not Called	Not Called	Not Called	Not Called	Not Called	Not Called	Not Called		Not Called	Not Called	Not Called	Not Called	Not Called	Not Called	Not Called	Not Called	Not Called	Not Called	Not Called	Not Called	Not Called	Not Called	Not Called	Not Called	Not Called	Not Called	Not Called	Not Called	Lost	Not Called	Not Called	Not Called
TCGA-FG-8187	TCGA-FG-8187-01	OAST	Diffuse Glioma	Oligoastrocytoma	Oligoastrocytoma	G2	Yes	No	FG	CNS	2	Lost	Not Called	Not Called	Not Called	Not Called	Not Called	Not Called	Not Called	Not Called	Not Called	Not Called	Not Called	Not Called	Not Called	Not Called	Not Called	Not Called	Not Called	Not Called	Not Called	Not Called	Not Called	Not Called	Not Called	Not Called	Not Called	Not Called	Not Called	Not Called	Not Called	Not Called	Not Called	Not Called	Not Called	Lost	Not Called	Not Called	Not Called
TCGA-FG-8188	TCGA-FG-8188-01	OAST	Diffuse Glioma	Oligoastrocytoma	Oligoastrocytoma	G2	Yes	No	FG	CNS	2	Not Called	Not Called	Not Called	Not Called	Not Called	Not Called	Not Called		Not Called	Not Called	Not Called	Not Called	Not Called	Not Called	Not Called		Not Called	Not Called	Not Called			Not Called	Not Called	Not Called	Not Called	Not Called	Not Called	Not Called	Not Called	Not Called	Not Called	Lost	Lost		Not Called	Not Called	Not Called	Not Called
TCGA-FG-8189	TCGA-FG-8189-01	ODG	Diffuse Glioma	Oligodendroglioma	Oligodendroglioma	G2	Yes	No	FG	CNS
TCGA-FG-8191	TCGA-FG-8191-01	ODG	Diffuse Glioma	Oligodendroglioma	Oligodendroglioma	G3	Yes	No	FG	CNS	0	Not Called	Not Called	Not Called	Not Called	Not Called	Not Called	Not Called	Not Called	Not Called	Not Called	Not Called		Not Called	Not Called	Not Called	Not Called	Not Called	Not Called	Not Called	Not Called	Not Called	Not Called	Not Called	Not Called	Not Called	Not Called	Not Called	Not Called	Not Called	Not Called	Not Called	Not Called	Not Called	Not Called	Not Called	Not Called	Not Called	Not Called
TCGA-FG-A4MT	TCGA-FG-A4MT-01	ODG	Diffuse Glioma	Oligodendroglioma	Oligodendroglioma	G2	Yes	No	FG	CNS	1	Not Called	Not Called	Not Called	Not Called	Not Called	Not Called	Not Called	Not Called	Not Called	Not Called	Not Called	Lost	Not Called	Not Called	Not Called		Not Called	Not Called	Not Called	Not Called	Not Called	Not Called	Not Called	Not Called	Not Called		Not Called	Not Called	Not Called	Not Called	Not Called	Not Called	Not Called	Not Called		Not Called	Not Called	Not Called
TCGA-FG-A4MU	TCGA-FG-A4MU-01	OAST	Diffuse Glioma	Oligoastrocytoma	Oligoastrocytoma	G3	Yes	No	FG	CNS	8	Not Called	Not Called	Not Called	Not Called	Not Called	Not Called	Not Called	Not Called	Not Called	Not Called	Not Called	Not Called	Gained	Gained	Not Called	Not Called		Not Called	Lost	Lost	Not Called	Not Called	Not Called	Not Called	Not Called	Not Called	Not Called	Not Called	Not Called	Not Called	Not Called	Not Called	Not Called	Gained	Gained	Gained	Gained	Not Called
TCGA-FG-A4MW	TCGA-FG-A4MW-01	OAST	Diffuse Glioma	Oligoastrocytoma	Oligoastrocytoma	G3	Yes	No	FG	CNS	7	Not Called	Not Called	Not Called	Not Called	Not Called	Not Called	Not Called	Not Called		Not Called	Not Called	Not Called	Gained	Gained	Not Called	Not Called		Not Called	Lost	Lost	Not Called	Not Called	Not Called	Not Called	Not Called	Not Called	Lost	Not Called	Not Called	Not Called	Not Called	Not Called	Not Called	Gained	Gained	Not Called	Not Called	Not Called
TCGA-FG-A4MX	TCGA-FG-A4MX-01	DIFG	Diffuse Glioma	Astrocytoma	Astrocytoma	G2	Yes	No	FG	CNS	0	Not Called	Not Called	Not Called	Not Called	Not Called	Not Called	Not Called	Not Called	Not Called	Not Called	Not Called	Not Called	Not Called	Not Called	Not Called	Not Called		Not Called	Not Called	Not Called	Not Called	Not Called	Not Called		Not Called	Not Called	Not Called	Not Called	Not Called	Not Called	Not Called	Not Called	Not Called	Not Called		Not Called	Not Called	Not Called
TCGA-FG-A4MY	TCGA-FG-A4MY-01	OAST	Diffuse Glioma	Oligoastrocytoma	Oligoastrocytoma	G2	Yes	No	FG	CNS	2	Not Called	Not Called	Not Called	Not Called	Not Called		Not Called		Not Called	Not Called	Not Called	Not Called	Not Called	Not Called	Not Called			Gained		Not Called		Not Called	Not Called	Not Called		Not Called		Not Called	Not Called	Not Called	Not Called	Not Called	Not Called	Not Called	Not Called	Not Called	Not Called	Not Called
TCGA-FG-A60J	TCGA-FG-A60J-01	OAST	Diffuse Glioma	Oligoastrocytoma	Oligoastrocytoma	G2	Yes	No	FG	CNS	2	Not Called	Not Called	Not Called	Not Called	Not Called	Not Called	Not Called	Not Called	Not Called	Not Called	Not Called	Not Called	Not Called	Not Called	Not Called	Not Called	Not Called	Not Called	Not Called	Not Called	Not Called	Not Called	Not Called	Not Called	Lost	Not Called	Not Called	Not Called	Not Called	Not Called		Not Called	Not Called	Not Called	Not Called	Not Called	Not Called	Lost
TCGA-FG-A60K	TCGA-FG-A60K-01	OAST	Diffuse Glioma	Oligoastrocytoma	Oligoastrocytoma	G2	Yes	No	FG	CNS	2	Lost	Not Called	Not Called	Not Called	Not Called	Not Called	Not Called	Not Called	Not Called	Not Called	Not Called	Not Called	Not Called	Not Called	Not Called	Not Called	Not Called	Not Called	Not Called	Not Called	Not Called	Not Called	Not Called	Not Called	Not Called	Not Called	Not Called	Not Called	Not Called	Not Called	Not Called	Not Called	Not Called	Not Called	Lost	Not Called	Not Called	Not Called
TCGA-FG-A60L	TCGA-FG-A60L-01	DIFG	Diffuse Glioma	Astrocytoma	Astrocytoma	G2	Yes	No	FG	CNS	3	Not Called	Not Called	Not Called	Not Called	Not Called	Not Called	Not Called	Not Called	Not Called	Not Called	Not Called	Not Called	Not Called		Not Called	Not Called	Not Called	Not Called	Gained	Not Called		Gained	Not Called	Not Called	Lost	Not Called	Not Called	Not Called	Not Called	Not Called	Not Called	Not Called	Not Called	Not Called	Not Called	Not Called	Not Called	Not Called
TCGA-FG-A6IZ	TCGA-FG-A6IZ-01	ODG	Diffuse Glioma	Oligodendroglioma	Oligodendroglioma	G2	Yes	No	FG	CNS	3	Lost	Not Called	Not Called	Not Called	Not Called	Not Called	Not Called	Not Called	Not Called	Not Called	Not Called	Not Called	Not Called	Not Called	Not Called	Not Called	Not Called	Not Called	Not Called	Not Called	Not Called	Not Called	Not Called	Not Called	Lost	Not Called	Not Called	Not Called	Not Called	Not Called	Not Called	Not Called	Not Called	Not Called	Lost	Not Called	Not Called	Not Called
TCGA-FG-A6J1	TCGA-FG-A6J1-01	ODG	Diffuse Glioma	Oligodendroglioma	Oligodendroglioma	G2	Yes	No	FG	CNS	4	Lost	Not Called	Not Called	Not Called	Not Called	Not Called	Lost	Lost	Not Called	Not Called	Not Called	Not Called	Not Called	Not Called	Not Called	Not Called	Not Called	Not Called	Not Called	Not Called	Not Called	Not Called	Not Called	Not Called	Not Called	Not Called	Not Called	Not Called	Not Called	Not Called	Not Called	Not Called	Not Called	Not Called	Lost	Not Called	Not Called	Not Called
TCGA-FG-A6J3	TCGA-FG-A6J3-01	DIFG	Diffuse Glioma	Astrocytoma	Astrocytoma	G3	Yes	No	FG	CNS	8	Not Called	Not Called	Not Called		Not Called		Not Called	Lost	Lost	Lost		Lost	Not Called	Not Called	Not Called	Not Called		Gained	Not Called		Not Called		Gained		Lost			Not Called	Not Called	Gained	Not Called	Not Called	Not Called	Not Called		Not Called		Not Called
TCGA-FG-A70Y	TCGA-FG-A70Y-01	ODG	Diffuse Glioma	Oligodendroglioma	Oligodendroglioma	G2	Yes	No	FG	CNS	0	Not Called	Not Called	Not Called	Not Called	Not Called	Not Called	Not Called	Not Called	Not Called	Not Called	Not Called	Not Called	Not Called	Not Called	Not Called			Not Called		Not Called	Not Called	Not Called	Not Called	Not Called		Not Called	Not Called	Not Called	Not Called	Not Called	Not Called	Not Called	Not Called	Not Called	Not Called	Not Called	Not Called	Not Called
TCGA-FG-A70Z	TCGA-FG-A70Z-01	OAST	Diffuse Glioma	Oligoastrocytoma	Oligoastrocytoma	G3	Yes	No	FG	CNS	5	Not Called	Not Called	Not Called	Not Called	Not Called	Not Called	Not Called	Not Called	Not Called	Not Called	Not Called	Not Called	Gained	Gained	Not Called	Not Called	Not Called	Not Called	Lost	Lost	Not Called	Not Called	Not Called	Not Called	Lost	Not Called	Not Called	Not Called	Not Called	Not Called	Not Called	Not Called	Not Called	Not Called	Not Called	Not Called	Not Called	Not Called
TCGA-FG-A710	TCGA-FG-A710-01	ODG	Diffuse Glioma	Oligodendroglioma	Oligodendroglioma	G2	Yes	No	FG	CNS	2	Lost	Not Called	Not Called	Not Called	Not Called	Not Called	Not Called	Not Called	Not Called	Not Called	Not Called	Not Called	Not Called	Not Called	Not Called	Not Called	Not Called	Not Called	Not Called	Not Called	Not Called	Not Called	Not Called	Not Called	Not Called	Not Called	Not Called	Not Called	Not Called	Not Called	Not Called	Not Called	Not Called	Not Called	Lost	Not Called	Not Called	Not Called
TCGA-FG-A711	TCGA-FG-A711-01	ODG	Diffuse Glioma	Oligodendroglioma	Oligodendroglioma	G2	Yes	No	FG	CNS	1	Not Called	Not Called	Not Called	Not Called	Not Called	Not Called	Not Called	Not Called	Not Called	Not Called	Not Called	Not Called	Not Called		Not Called	Not Called	Lost	Not Called	Not Called		Not Called	Not Called		Not Called	Not Called	Not Called	Not Called	Not Called	Not Called	Not Called	Not Called	Not Called	Not Called	Not Called		Not Called	Not Called
TCGA-FG-A713	TCGA-FG-A713-01	OAST	Diffuse Glioma	Oligoastrocytoma	Oligoastrocytoma	G2	Yes	No	FG	CNS	2	Lost	Not Called	Not Called	Not Called	Not Called	Not Called	Not Called	Not Called	Not Called	Not Called	Not Called	Not Called	Not Called	Not Called	Not Called	Not Called	Not Called	Not Called	Not Called	Not Called	Not Called	Not Called	Not Called	Not Called	Not Called	Not Called	Not Called	Not Called	Not Called	Not Called	Not Called	Not Called	Not Called	Not Called	Lost	Not Called	Not Called	Not Called
TCGA-FG-A87N	TCGA-FG-A87N-01	DIFG	Diffuse Glioma	Astrocytoma	Astrocytoma	G3	Yes	No	FG	CNS	2	Not Called	Not Called	Not Called	Not Called	Not Called	Not Called	Not Called	Not Called	Not Called	Not Called	Not Called	Not Called	Not Called	Not Called	Not Called	Not Called	Not Called	Gained	Not Called		Not Called	Not Called	Not Called	Not Called	Not Called	Not Called	Not Called	Not Called	Not Called	Not Called	Not Called	Not Called	Not Called	Not Called		Lost	Not Called	Not Called
TCGA-FG-A87Q	TCGA-FG-A87Q-01	DIFG	Diffuse Glioma	Astrocytoma	Astrocytoma	G3	Yes	No	FG	CNS	8		Not Called	Not Called	Not Called	Not Called	Not Called	Gained	Not Called	Not Called	Not Called	Not Called	Not Called	Gained	Gained	Not Called	Not Called	Lost	Not Called	Lost	Lost	Not Called	Not Called	Not Called	Not Called	Lost	Not Called	Not Called	Not Called	Not Called	Not Called		Not Called	Not Called	Gained	Not Called	Not Called	Not Called	Not Called
TCGA-FN-7833	TCGA-FN-7833-01	OAST	Diffuse Glioma	Oligoastrocytoma	Oligoastrocytoma	G3	Yes	No	FN	CNS	0	Not Called	Not Called	Not Called	Not Called	Not Called	Not Called	Not Called	Not Called	Not Called	Not Called	Not Called		Not Called	Not Called	Not Called	Not Called	Not Called	Not Called	Not Called	Not Called	Not Called	Not Called	Not Called	Not Called	Not Called	Not Called	Not Called	Not Called	Not Called	Not Called	Not Called	Not Called	Not Called	Not Called	Not Called	Not Called	Not Called	Not Called
TCGA-HT-7467	TCGA-HT-7467-01	ODG	Diffuse Glioma	Oligodendroglioma	Oligodendroglioma	G2	No	Yes	HT	CNS	4	Lost	Not Called	Not Called	Not Called	Not Called	Not Called	Lost	Lost	Not Called	Not Called	Not Called	Not Called	Not Called	Not Called	Not Called	Not Called	Not Called	Not Called	Not Called	Not Called	Not Called	Not Called	Not Called	Not Called	Not Called	Not Called	Not Called	Not Called	Not Called	Not Called	Not Called	Not Called	Not Called	Not Called	Lost	Not Called	Not Called	Not Called
TCGA-HT-7468	TCGA-HT-7468-01	ODG	Diffuse Glioma	Oligodendroglioma	Oligodendroglioma	G3	No	Yes	HT	CNS	3	Lost	Not Called	Not Called	Not Called	Not Called	Not Called	Not Called	Not Called	Not Called	Not Called	Not Called	Not Called	Not Called	Not Called	Not Called	Not Called	Not Called	Not Called	Not Called	Not Called	Not Called	Not Called	Not Called	Not Called	Not Called	Not Called	Lost	Not Called	Not Called	Not Called	Not Called	Not Called	Not Called	Not Called	Lost	Not Called	Not Called	Not Called
TCGA-HT-7469	TCGA-HT-7469-01	ODG	Diffuse Glioma	Oligodendroglioma	Oligodendroglioma	G3	No	Yes	HT	CNS	5	Not Called	Not Called	Lost	Not Called	Lost		Not Called		Not Called		Not Called	Not Called	Not Called	Not Called	Not Called	Not Called		Not Called	Not Called		Not Called	Not Called	Not Called	Not Called	Lost	Not Called	Not Called	Not Called	Lost	Not Called	Not Called	Not Called	Not Called	Not Called	Lost	Not Called	Not Called	Not Called
TCGA-HT-7470	TCGA-HT-7470-01	ODG	Diffuse Glioma	Oligodendroglioma	Oligodendroglioma	G3	No	Yes	HT	CNS	3	Not Called	Not Called	Not Called	Not Called	Not Called		Not Called	Not Called	Not Called	Not Called	Not Called	Not Called	Not Called	Not Called	Not Called	Not Called		Not Called	Gained	Not Called	Lost		Not Called	Not Called	Lost	Not Called	Not Called	Not Called	Not Called	Not Called	Not Called	Not Called	Not Called	Not Called	Not Called	Not Called	Not Called	Not Called
TCGA-HT-7471	TCGA-HT-7471-01	ODG	Diffuse Glioma	Oligodendroglioma	Oligodendroglioma	G3	No	Yes	HT	CNS	2	Lost	Not Called	Not Called	Not Called	Not Called	Not Called	Not Called	Not Called	Not Called	Not Called	Not Called	Not Called	Not Called	Not Called	Not Called	Not Called	Not Called	Not Called	Not Called	Not Called	Not Called	Not Called	Not Called	Not Called	Not Called	Not Called	Not Called	Not Called	Not Called	Not Called	Not Called	Not Called	Not Called	Not Called	Lost	Not Called	Not Called	Not Called
TCGA-HT-7472	TCGA-HT-7472-01	ODG	Diffuse Glioma	Oligodendroglioma	Oligodendroglioma	G2	No	Yes	HT	CNS	0	Not Called	Not Called	Not Called	Not Called	Not Called	Not Called	Not Called	Not Called	Not Called	Not Called	Not Called		Not Called	Not Called	Not Called	Not Called	Not Called	Not Called	Not Called	Not Called	Not Called	Not Called	Not Called	Not Called	Not Called	Not Called	Not Called	Not Called	Not Called	Not Called	Not Called	Not Called	Not Called	Not Called		Not Called	Not Called	Not Called
TCGA-HT-7473	TCGA-HT-7473-01	OAST	Diffuse Glioma	Oligoastrocytoma	Oligoastrocytoma	G2	No	Yes	HT	CNS	4	Not Called	Not Called	Not Called	Not Called		Not Called	Not Called	Not Called	Not Called	Not Called	Not Called	Not Called	Gained	Gained	Not Called		Not Called	Not Called	Gained		Not Called	Not Called	Gained	Not Called	Not Called	Not Called	Not Called	Not Called	Not Called	Not Called	Not Called	Not Called	Not Called	Not Called	Not Called	Not Called	Not Called	Not Called
TCGA-HT-7474	TCGA-HT-7474-01	OAST	Diffuse Glioma	Oligoastrocytoma	Oligoastrocytoma	G2	No	Yes	HT	CNS	2	Not Called	Not Called	Not Called	Not Called	Not Called	Not Called	Not Called	Not Called	Lost	Not Called	Not Called	Not Called	Not Called	Not Called	Not Called	Not Called	Gained	Not Called	Not Called	Not Called	Not Called	Not Called	Not Called	Not Called	Not Called	Not Called	Not Called	Not Called	Not Called	Not Called	Not Called	Not Called	Not Called	Not Called	Not Called		Not Called	Not Called
TCGA-HT-7475	TCGA-HT-7475-01	OAST	Diffuse Glioma	Oligoastrocytoma	Oligoastrocytoma	G3	No	Yes	HT	CNS	4	Not Called	Gained	Not Called	Not Called	Not Called	Not Called	Lost	Not Called	Lost	Not Called	Not Called	Lost	Not Called		Not Called			Not Called	Not Called	Not Called	Not Called	Not Called	Not Called	Not Called		Not Called	Not Called	Not Called	Not Called	Not Called	Not Called	Not Called	Not Called	Not Called		Not Called	Not Called	Not Called
TCGA-HT-7476	TCGA-HT-7476-01	DIFG	Diffuse Glioma	Astrocytoma	Astrocytoma	G2	No	Yes	HT	CNS	3	Not Called	Not Called	Not Called	Not Called	Not Called	Not Called	Not Called		Not Called	Not Called	Not Called	Not Called	Not Called	Not Called	Gained	Gained		Not Called	Gained	Not Called	Not Called	Not Called	Not Called	Not Called	Not Called	Not Called	Not Called	Not Called	Not Called	Not Called	Not Called	Not Called	Not Called	Not Called	Not Called	Not Called	Not Called	Not Called
TCGA-HT-7477	TCGA-HT-7477-01	DIFG	Diffuse Glioma	Astrocytoma	Astrocytoma	G3	No	Yes	HT	CNS	13	Not Called		Lost	Lost	Lost		Gained	Gained	Not Called	Lost	Not Called	Not Called		Not Called	Not Called	Gained	Lost	Gained		Not Called	Lost		Not Called	Not Called	Lost			Lost	Not Called	Not Called		Not Called		Not Called		Not Called	Not Called	Not Called
TCGA-HT-7478	TCGA-HT-7478-01	DIFG	Diffuse Glioma	Astrocytoma	Astrocytoma	G2	No	Yes	HT	CNS	2	Not Called	Not Called	Not Called	Not Called		Not Called	Not Called	Not Called	Not Called	Not Called	Not Called	Not Called	Not Called	Not Called	Not Called	Not Called	Not Called	Not Called	Not Called	Not Called		Not Called	Gained	Lost	Not Called	Not Called	Not Called	Not Called	Not Called	Not Called	Not Called	Not Called	Not Called		Not Called	Not Called	Not Called	Not Called
TCGA-HT-7479	TCGA-HT-7479-01	DIFG	Diffuse Glioma	Astrocytoma	Astrocytoma	G3	No	Yes	HT	CNS	3	Not Called	Not Called	Not Called	Not Called	Not Called	Not Called	Not Called	Not Called	Not Called	Not Called	Not Called	Not Called	Not Called	Not Called	Gained	Gained	Not Called	Not Called	Gained	Not Called	Not Called	Not Called	Not Called	Not Called	Not Called	Not Called	Not Called	Not Called	Not Called	Not Called	Not Called	Not Called	Not Called	Not Called	Not Called	Not Called	Not Called	Not Called
TCGA-HT-7480	TCGA-HT-7480-01	ODG	Diffuse Glioma	Oligodendroglioma	Oligodendroglioma	G2	No	Yes	HT	CNS	3	Lost	Not Called	Not Called	Not Called	Not Called	Not Called	Not Called	Not Called	Not Called	Not Called	Not Called	Not Called	Not Called	Not Called	Not Called	Not Called	Not Called	Not Called	Not Called	Not Called	Not Called	Not Called	Not Called	Not Called	Not Called	Not Called	Lost	Not Called	Not Called	Not Called	Not Called	Not Called	Not Called	Not Called	Lost	Not Called	Not Called	Not Called
TCGA-HT-7481	TCGA-HT-7481-01	ODG	Diffuse Glioma	Oligodendroglioma	Oligodendroglioma	G2	No	Yes	HT	CNS	2	Lost	Not Called	Not Called	Not Called	Not Called	Not Called	Not Called	Not Called	Not Called	Not Called	Not Called	Not Called	Not Called	Not Called	Not Called	Not Called	Not Called	Not Called	Not Called	Not Called	Not Called	Not Called	Not Called	Not Called	Not Called	Not Called	Not Called	Not Called	Not Called	Not Called	Not Called	Not Called	Not Called	Not Called	Lost	Not Called	Not Called	Not Called
TCGA-HT-7482	TCGA-HT-7482-01	OAST	Diffuse Glioma	Oligoastrocytoma	Oligoastrocytoma	G2	No	Yes	HT	CNS	4	Not Called	Not Called	Not Called	Not Called		Not Called	Not Called	Not Called	Not Called	Not Called	Not Called	Not Called	Not Called	Not Called	Gained	Gained	Not Called	Not Called	Gained	Not Called	Not Called	Not Called	Not Called	Not Called	Lost	Not Called	Not Called	Not Called	Not Called	Not Called	Not Called	Not Called	Not Called	Not Called	Not Called	Not Called	Not Called	Not Called
TCGA-HT-7483	TCGA-HT-7483-01	OAST	Diffuse Glioma	Oligoastrocytoma	Oligoastrocytoma	G2	No	Yes	HT	CNS	1	Not Called	Not Called	Not Called	Not Called	Not Called	Not Called	Not Called	Not Called	Not Called	Not Called	Not Called	Not Called	Not Called	Not Called	Not Called	Not Called	Not Called		Gained		Not Called	Not Called	Not Called	Not Called		Not Called	Not Called	Not Called	Not Called	Not Called	Not Called	Not Called	Not Called	Not Called	Not Called	Not Called	Not Called	Not Called
TCGA-HT-7485	TCGA-HT-7485-01	DIFG	Diffuse Glioma	Astrocytoma	Astrocytoma	G2	No	Yes	HT	CNS	0	Not Called	Not Called	Not Called	Not Called	Not Called	Not Called	Not Called	Not Called	Not Called	Not Called	Not Called	Not Called	Not Called	Not Called	Not Called	Not Called	Not Called	Not Called	Not Called		Not Called	Not Called	Not Called	Not Called	Not Called	Not Called	Not Called	Not Called	Not Called	Not Called	Not Called	Not Called	Not Called	Not Called	Not Called	Not Called	Not Called	Not Called
TCGA-HT-7601	TCGA-HT-7601-01	DIFG	Diffuse Glioma	Astrocytoma	Astrocytoma	G3	No	Yes	HT	CNS	1	Not Called	Not Called	Not Called	Not Called	Not Called	Not Called	Not Called	Not Called	Not Called	Not Called	Not Called	Not Called	Not Called	Not Called	Not Called	Not Called	Not Called	Not Called	Not Called	Not Called	Lost		Not Called	Not Called	Not Called	Not Called	Not Called	Not Called	Not Called	Not Called	Not Called	Not Called	Not Called	Not Called		Not Called	Not Called	Not Called
TCGA-HT-7602	TCGA-HT-7602-01	ODG	Diffuse Glioma	Oligodendroglioma	Oligodendroglioma	G2	No	Yes	HT	CNS	0	Not Called	Not Called	Not Called	Not Called	Not Called	Not Called	Not Called	Not Called	Not Called	Not Called	Not Called	Not Called	Not Called	Not Called	Not Called	Not Called	Not Called	Not Called	Not Called	Not Called	Not Called	Not Called	Not Called	Not Called	Not Called	Not Called	Not Called	Not Called	Not Called	Not Called	Not Called	Not Called	Not Called	Not Called	Not Called	Not Called	Not Called	Not Called
TCGA-HT-7603	TCGA-HT-7603-01	ODG	Diffuse Glioma	Oligodendroglioma	Oligodendroglioma	G2	No	Yes	HT	CNS	0	Not Called	Not Called	Not Called	Not Called	Not Called		Not Called	Not Called	Not Called	Not Called	Not Called	Not Called	Not Called	Not Called	Not Called	Not Called	Not Called	Not Called	Not Called	Not Called	Not Called	Not Called	Not Called	Not Called	Not Called		Not Called	Not Called	Not Called	Not Called	Not Called	Not Called	Not Called	Not Called	Not Called	Not Called	Not Called
TCGA-HT-7604	TCGA-HT-7604-01	DIFG	Diffuse Glioma	Astrocytoma	Astrocytoma	G2	No	Yes	HT	CNS	1	Not Called	Not Called	Not Called	Not Called	Not Called	Not Called	Not Called	Not Called	Not Called	Not Called		Not Called	Not Called	Not Called			Not Called	Not Called	Not Called	Not Called	Not Called	Not Called	Gained	Not Called	Not Called	Not Called	Not Called	Not Called	Not Called	Not Called	Not Called	Not Called	Not Called	Not Called	Not Called	Not Called	Not Called	Not Called
TCGA-HT-7605	TCGA-HT-7605-01	ODG	Diffuse Glioma	Oligodendroglioma	Oligodendroglioma	G2	No	Yes	HT	CNS	2	Lost	Not Called	Not Called	Not Called	Not Called	Not Called	Not Called	Not Called	Not Called	Not Called	Not Called	Not Called	Not Called	Not Called	Not Called	Not Called	Not Called	Not Called	Not Called	Not Called	Not Called	Not Called	Not Called	Not Called	Not Called	Not Called	Not Called	Not Called	Not Called	Not Called	Not Called	Not Called	Not Called	Not Called	Lost	Not Called	Not Called	Not Called
TCGA-HT-7606	TCGA-HT-7606-01	DIFG	Diffuse Glioma	Astrocytoma	Astrocytoma	G2	No	Yes	HT	CNS	2	Not Called	Not Called	Not Called	Not Called		Not Called	Not Called	Not Called	Not Called	Not Called		Lost	Not Called	Not Called	Not Called	Not Called	Lost	Not Called	Not Called		Not Called	Not Called	Not Called	Not Called	Not Called		Not Called	Not Called	Not Called	Not Called	Not Called	Not Called		Not Called		Not Called	Not Called	Not Called
TCGA-HT-7607	TCGA-HT-7607-01	DIFG	Diffuse Glioma	Astrocytoma	Astrocytoma	G2	No	Yes	HT	CNS	3	Lost	Not Called	Not Called	Not Called	Not Called	Not Called	Not Called	Not Called	Not Called	Not Called	Not Called	Not Called	Not Called	Not Called	Not Called	Not Called	Not Called	Not Called	Not Called	Not Called		Gained	Not Called	Not Called	Not Called	Not Called	Not Called	Not Called	Not Called	Not Called	Not Called	Not Called	Not Called	Not Called	Lost	Not Called	Not Called	Not Called
TCGA-HT-7608	TCGA-HT-7608-01	OAST	Diffuse Glioma	Oligoastrocytoma	Oligoastrocytoma	G2	No	Yes	HT	CNS	2	Lost	Not Called	Not Called	Not Called	Not Called	Not Called	Not Called	Not Called	Not Called	Not Called	Not Called	Not Called	Not Called	Not Called	Not Called	Not Called	Not Called	Not Called	Not Called	Not Called	Not Called	Not Called	Not Called	Not Called	Not Called	Not Called	Not Called	Not Called	Not Called	Not Called	Not Called	Not Called	Not Called	Not Called	Lost	Not Called	Not Called	Not Called
TCGA-HT-7609	TCGA-HT-7609-01	OAST	Diffuse Glioma	Oligoastrocytoma	Oligoastrocytoma	G3	No	Yes	HT	CNS	0	Not Called	Not Called	Not Called	Not Called	Not Called	Not Called	Not Called	Not Called	Not Called	Not Called	Not Called	Not Called	Not Called	Not Called	Not Called	Not Called	Not Called	Not Called	Not Called	Not Called	Not Called	Not Called	Not Called	Not Called	Not Called	Not Called		Not Called	Not Called	Not Called	Not Called	Not Called	Not Called	Not Called	Not Called	Not Called	Not Called	Not Called
TCGA-HT-7610	TCGA-HT-7610-01	OAST	Diffuse Glioma	Oligoastrocytoma	Oligoastrocytoma	G2	No	Yes	HT	CNS	0	Not Called	Not Called	Not Called	Not Called	Not Called	Not Called	Not Called	Not Called	Not Called	Not Called	Not Called	Not Called	Not Called		Not Called	Not Called	Not Called	Not Called	Not Called	Not Called	Not Called	Not Called	Not Called	Not Called	Not Called	Not Called	Not Called	Not Called	Not Called	Not Called	Not Called	Not Called	Not Called	Not Called		Not Called	Not Called	Not Called
TCGA-HT-7611	TCGA-HT-7611-01	OAST	Diffuse Glioma	Oligoastrocytoma	Oligoastrocytoma	G2	No	Yes	HT	CNS	1	Not Called	Not Called	Not Called	Not Called	Not Called	Not Called	Not Called	Not Called	Not Called	Not Called	Not Called	Not Called	Not Called	Not Called	Not Called	Not Called	Not Called	Not Called	Not Called	Not Called	Not Called	Not Called	Not Called			Not Called	Not Called	Not Called	Not Called	Gained	Not Called	Not Called	Not Called	Not Called	Not Called	Not Called	Not Called	Not Called
TCGA-HT-7616	TCGA-HT-7616-01	ODG	Diffuse Glioma	Oligodendroglioma	Oligodendroglioma	G3	No	Yes	HT	CNS	4	Lost	Not Called	Not Called	Not Called	Not Called	Not Called	Not Called	Not Called	Not Called	Not Called	Not Called	Not Called	Not Called	Not Called	Not Called	Not Called	Not Called	Not Called	Not Called	Not Called	Not Called	Not Called	Not Called	Not Called		Not Called	Not Called	Not Called	Not Called	Not Called	Not Called	Lost	Lost	Not Called	Lost	Not Called	Not Called	Not Called
TCGA-HT-7620	TCGA-HT-7620-01	ODG	Diffuse Glioma	Oligodendroglioma	Oligodendroglioma	G3	No	Yes	HT	CNS	2	Lost	Not Called	Not Called	Not Called	Not Called	Not Called	Not Called	Not Called	Not Called	Not Called	Not Called	Not Called	Not Called	Not Called	Not Called	Not Called	Not Called	Not Called	Not Called	Not Called	Not Called	Not Called	Not Called	Not Called	Not Called	Not Called	Not Called	Not Called	Not Called	Not Called	Not Called	Not Called	Not Called	Not Called	Lost	Not Called	Not Called	Not Called
TCGA-HT-7676	TCGA-HT-7676-01	ODG	Diffuse Glioma	Oligodendroglioma	Oligodendroglioma	G2	No	Yes	HT	CNS	0	Not Called	Not Called	Not Called	Not Called	Not Called		Not Called	Not Called	Not Called	Not Called	Not Called	Not Called	Not Called	Not Called	Not Called		Not Called	Not Called	Not Called	Not Called	Not Called		Not Called	Not Called	Not Called	Not Called	Not Called	Not Called	Not Called	Not Called	Not Called	Not Called	Not Called	Not Called	Not Called	Not Called	Not Called	Not Called
TCGA-HT-7677	TCGA-HT-7677-01	ODG	Diffuse Glioma	Oligodendroglioma	Oligodendroglioma	G3	No	Yes	HT	CNS	2	Lost	Not Called	Not Called	Not Called	Not Called	Not Called	Not Called	Not Called	Not Called	Not Called	Not Called	Not Called	Not Called	Not Called	Not Called	Not Called	Not Called	Not Called	Not Called	Not Called	Not Called	Not Called	Not Called	Not Called	Not Called	Not Called	Not Called	Not Called	Not Called	Not Called	Not Called	Not Called	Not Called	Not Called	Lost	Not Called	Not Called	Not Called
TCGA-HT-7680	TCGA-HT-7680-01	DIFG	Diffuse Glioma	Astrocytoma	Astrocytoma	G2	No	Yes	HT	CNS	0	Not Called	Not Called	Not Called	Not Called	Not Called	Not Called	Not Called	Not Called	Not Called	Not Called	Not Called	Not Called	Not Called	Not Called	Not Called	Not Called	Not Called	Not Called	Not Called	Not Called	Not Called	Not Called	Not Called	Not Called	Not Called	Not Called	Not Called	Not Called	Not Called	Not Called	Not Called	Not Called	Not Called	Not Called	Not Called	Not Called	Not Called	Not Called
TCGA-HT-7681	TCGA-HT-7681-01	OAST	Diffuse Glioma	Oligoastrocytoma	Oligoastrocytoma	G2	No	Yes	HT	CNS	2	Lost	Not Called	Not Called	Not Called	Not Called	Not Called	Not Called	Not Called	Not Called	Not Called	Not Called	Not Called	Not Called	Not Called	Not Called	Not Called	Not Called	Not Called	Not Called	Not Called	Not Called	Not Called	Not Called	Not Called	Not Called	Not Called	Not Called	Not Called	Not Called	Not Called	Not Called	Not Called	Not Called	Not Called	Lost	Not Called	Not Called	Not Called
TCGA-HT-7684	TCGA-HT-7684-01	OAST	Diffuse Glioma	Oligoastrocytoma	Oligoastrocytoma	G3	No	Yes	HT	CNS	2	Not Called	Not Called	Not Called	Not Called	Not Called	Not Called	Not Called	Not Called	Not Called	Not Called	Not Called	Not Called	Not Called	Not Called	Not Called	Not Called	Not Called	Not Called	Not Called	Not Called	Gained	Gained	Not Called	Not Called	Not Called	Not Called	Not Called	Not Called	Not Called	Not Called	Not Called	Not Called	Not Called	Not Called	Not Called	Not Called	Not Called	Not Called
TCGA-HT-7686	TCGA-HT-7686-01	DIFG	Diffuse Glioma	Astrocytoma	Astrocytoma	G3	No	Yes	HT	CNS	3	Gained	Not Called	Not Called	Not Called		Not Called	Not Called	Not Called	Not Called	Not Called	Not Called	Not Called	Not Called	Not Called	Not Called	Not Called	Not Called	Not Called	Not Called	Not Called	Lost	Not Called	Not Called	Lost	Not Called	Not Called	Not Called	Not Called	Not Called	Not Called	Not Called	Not Called	Not Called	Not Called	Not Called	Not Called	Not Called	Not Called
TCGA-HT-7687	TCGA-HT-7687-01	ODG	Diffuse Glioma	Oligodendroglioma	Oligodendroglioma	G3	No	Yes	HT	CNS	2	Lost	Not Called	Not Called	Not Called	Not Called	Not Called	Not Called	Not Called	Not Called	Not Called	Not Called	Not Called	Not Called	Not Called	Not Called	Not Called	Not Called	Not Called	Not Called	Not Called	Not Called	Not Called	Not Called	Not Called	Not Called	Not Called	Not Called	Not Called	Not Called	Not Called	Not Called	Not Called	Not Called	Not Called	Lost	Not Called	Not Called	Not Called
TCGA-HT-7688	TCGA-HT-7688-01	ODG	Diffuse Glioma	Oligodendroglioma	Oligodendroglioma	G3	No	Yes	HT	CNS	8	Not Called	Gained	Not Called	Not Called	Not Called	Not Called	Not Called	Lost	Lost	Not Called	Not Called	Lost	Not Called	Not Called	Lost	Not Called		Not Called	Gained		Not Called	Not Called	Not Called	Lost			Not Called	Not Called	Not Called	Not Called	Not Called	Not Called	Not Called	Not Called	Lost	Not Called	Not Called	Not Called
TCGA-HT-7689	TCGA-HT-7689-01	ODG	Diffuse Glioma	Oligodendroglioma	Oligodendroglioma	G2	No	Yes	HT	CNS	2	Not Called	Not Called	Not Called	Not Called	Not Called	Not Called	Not Called	Not Called	Not Called	Not Called	Not Called	Lost	Not Called	Not Called	Not Called	Not Called		Not Called	Not Called	Not Called	Not Called	Not Called	Not Called	Not Called	Lost	Not Called	Not Called		Not Called	Not Called	Not Called	Not Called	Not Called	Not Called		Not Called	Not Called	Not Called
TCGA-HT-7690	TCGA-HT-7690-01	OAST	Diffuse Glioma	Oligoastrocytoma	Oligoastrocytoma	G3	No	Yes	HT	CNS	2	Not Called	Not Called			Lost	Not Called	Not Called	Not Called	Not Called	Not Called	Not Called	Not Called	Not Called	Not Called	Not Called	Not Called	Not Called	Not Called	Not Called		Not Called	Not Called	Not Called	Not Called		Not Called	Not Called	Not Called	Not Called	Not Called	Not Called	Not Called	Not Called	Not Called	Not Called	Not Called	Not Called	Not Called
TCGA-HT-7691	TCGA-HT-7691-01	DIFG	Diffuse Glioma	Astrocytoma	Astrocytoma	G2	No	Yes	HT	CNS	0	Not Called	Not Called	Not Called	Not Called	Not Called	Not Called	Not Called	Not Called	Not Called	Not Called	Not Called	Not Called	Not Called	Not Called	Not Called	Not Called	Not Called	Not Called	Not Called	Not Called	Not Called	Not Called	Not Called	Not Called	Not Called	Not Called	Not Called	Not Called	Not Called	Not Called	Not Called	Not Called	Not Called	Not Called	Not Called	Not Called	Not Called	Not Called
TCGA-HT-7692	TCGA-HT-7692-01	OAST	Diffuse Glioma	Oligoastrocytoma	Oligoastrocytoma	G2	No	Yes	HT	CNS	4	Lost	Not Called	Not Called	Not Called	Not Called	Not Called	Not Called	Not Called	Not Called	Not Called	Not Called	Not Called	Not Called	Not Called	Not Called	Not Called	Not Called	Not Called	Not Called	Not Called	Not Called	Not Called	Not Called	Not Called	Not Called	Not Called	Not Called	Not Called	Not Called	Not Called	Not Called	Lost	Lost	Not Called	Lost	Not Called	Not Called	Not Called
TCGA-HT-7693	TCGA-HT-7693-01	ODG	Diffuse Glioma	Oligodendroglioma	Oligodendroglioma	G2	No	Yes	HT	CNS	4	Not Called	Not Called	Not Called	Not Called	Not Called	Not Called	Not Called	Not Called	Not Called	Not Called	Not Called	Not Called	Not Called		Not Called	Not Called	Not Called	Not Called	Not Called	Not Called	Lost	Gained	Not Called	Not Called	Not Called	Not Called	Not Called	Not Called	Not Called	Not Called	Not Called	Not Called	Not Called	Not Called	Not Called	Lost	Gained	Not Called
TCGA-HT-7694	TCGA-HT-7694-01	ODG	Diffuse Glioma	Oligodendroglioma	Oligodendroglioma	G3	No	Yes	HT	CNS	2	Lost	Not Called	Not Called	Not Called	Not Called	Not Called	Not Called	Not Called	Not Called	Not Called	Not Called	Not Called	Not Called	Not Called	Not Called	Not Called	Not Called	Not Called	Not Called	Not Called	Not Called	Not Called	Not Called	Not Called	Not Called	Not Called	Not Called	Not Called	Not Called	Not Called	Not Called	Not Called	Not Called	Not Called	Lost	Not Called	Not Called	Not Called
TCGA-HT-7695	TCGA-HT-7695-01	ODG	Diffuse Glioma	Oligodendroglioma	Oligodendroglioma	G2	No	Yes	HT	CNS	2	Lost	Not Called	Not Called	Not Called	Not Called	Not Called	Not Called	Not Called	Not Called	Not Called	Not Called	Not Called	Not Called	Not Called	Not Called	Not Called	Not Called	Not Called	Not Called	Not Called	Not Called	Not Called	Not Called	Not Called	Not Called	Not Called	Not Called	Not Called	Not Called	Not Called	Not Called	Not Called	Not Called	Not Called	Lost	Not Called	Not Called	Not Called
TCGA-HT-7854	TCGA-HT-7854-01	DIFG	Diffuse Glioma	Astrocytoma	Astrocytoma	G2	No	Yes	HT	CNS	0	Not Called	Not Called	Not Called	Not Called	Not Called	Not Called	Not Called	Not Called	Not Called	Not Called	Not Called	Not Called	Not Called	Not Called	Not Called	Not Called	Not Called	Not Called	Not Called	Not Called	Not Called	Not Called	Not Called	Not Called	Not Called	Not Called	Not Called	Not Called	Not Called	Not Called	Not Called	Not Called	Not Called	Not Called	Not Called	Not Called	Not Called	Not Called
TCGA-HT-7855	TCGA-HT-7855-01	DIFG	Diffuse Glioma	Astrocytoma	Astrocytoma	G3	No	Yes	HT	CNS	1	Not Called	Not Called	Not Called	Not Called	Not Called	Not Called	Not Called	Not Called	Not Called	Not Called	Not Called	Not Called	Not Called	Not Called	Not Called	Gained	Not Called	Not Called	Not Called	Not Called	Not Called	Not Called	Not Called	Not Called	Not Called	Not Called	Not Called	Not Called	Not Called	Not Called	Not Called	Not Called	Not Called	Not Called	Not Called	Not Called	Not Called	Not Called
TCGA-HT-7856	TCGA-HT-7856-01	ODG	Diffuse Glioma	Oligodendroglioma	Oligodendroglioma	G3	No	Yes	HT	CNS	4	Lost	Not Called	Not Called	Not Called	Not Called	Not Called	Not Called	Lost	Not Called	Not Called	Not Called	Not Called	Not Called	Not Called	Not Called	Not Called	Not Called	Not Called	Not Called	Not Called	Not Called	Not Called	Not Called	Not Called	Lost	Not Called	Not Called	Not Called	Not Called	Not Called	Not Called	Not Called	Not Called	Not Called	Lost	Not Called	Not Called	Not Called
TCGA-HT-7857	TCGA-HT-7857-01	DIFG	Diffuse Glioma	Astrocytoma	Astrocytoma	G3	NA	NA	HT	CNS	5	Lost	Not Called	Not Called	Not Called	Not Called	Not Called	Not Called		Not Called	Not Called	Not Called	Not Called	Not Called	Not Called	Not Called	Not Called		Not Called	Lost	Not Called	Not Called	Not Called	Not Called	Not Called		Not Called	Not Called	Not Called		Not Called	Not Called	Lost	Lost	Not Called	Not Called	Not Called	Not Called	Lost
TCGA-HT-7858	TCGA-HT-7858-01	DIFG	Diffuse Glioma	Astrocytoma	Astrocytoma	G2	No	Yes	HT	CNS	1	Not Called	Not Called	Not Called	Not Called	Not Called	Not Called	Not Called	Not Called	Not Called	Not Called	Not Called	Not Called	Not Called	Not Called	Not Called	Not Called	Not Called	Not Called	Not Called	Not Called	Not Called	Not Called	Not Called	Not Called	Not Called		Not Called	Not Called	Not Called	Not Called	Not Called	Lost	Not Called	Not Called	Not Called	Not Called	Not Called	Not Called
TCGA-HT-7860	TCGA-HT-7860-01	DIFG	Diffuse Glioma	Astrocytoma	Astrocytoma	G3	No	Yes	HT	CNS	9	Not Called	Not Called	Not Called		Not Called	Not Called	Not Called	Not Called	Not Called	Not Called	Not Called	Not Called	Gained	Gained	Not Called	Not Called	Not Called	Not Called	Lost	Lost	Not Called	Not Called	Not Called	Not Called	Not Called	Not Called	Not Called	Not Called	Not Called	Not Called	Not Called	Not Called	Not Called	Gained	Gained	Gained	Gained	Not Called
TCGA-HT-7873	TCGA-HT-7873-01	OAST	Diffuse Glioma	Oligoastrocytoma	Oligoastrocytoma	G2	No	Yes	HT	CNS	2	Not Called	Not Called	Not Called	Not Called	Not Called	Not Called	Not Called	Not Called		Not Called	Not Called	Not Called	Not Called	Not Called	Not Called		Not Called				Lost	Not Called	Gained	Not Called		Not Called	Not Called	Not Called	Not Called	Not Called	Not Called	Not Called	Not Called		Not Called	Not Called	Not Called	Not Called
TCGA-HT-7874	TCGA-HT-7874-01	ODG	Diffuse Glioma	Oligodendroglioma	Oligodendroglioma	G3	No	Yes	HT	CNS	2	Lost	Not Called	Not Called	Not Called	Not Called	Not Called	Not Called	Not Called	Not Called	Not Called	Not Called	Not Called	Not Called	Not Called	Not Called	Not Called	Not Called	Not Called	Not Called	Not Called	Not Called	Not Called	Not Called	Not Called	Not Called	Not Called	Not Called	Not Called	Not Called	Not Called	Not Called	Not Called	Not Called	Not Called	Lost	Not Called	Not Called	Not Called
TCGA-HT-7875	TCGA-HT-7875-01	ODG	Diffuse Glioma	Oligodendroglioma	Oligodendroglioma	G2	No	Yes	HT	CNS	2	Lost	Not Called	Not Called	Not Called	Not Called	Not Called	Not Called	Not Called	Not Called	Not Called	Not Called	Not Called	Not Called	Not Called	Not Called	Not Called	Not Called	Not Called	Not Called	Not Called	Not Called	Not Called	Not Called	Not Called	Not Called	Not Called		Not Called	Not Called	Not Called	Not Called	Not Called	Not Called	Not Called	Lost	Not Called	Not Called	Not Called
TCGA-HT-7877	TCGA-HT-7877-01	ODG	Diffuse Glioma	Oligodendroglioma	Oligodendroglioma	G2	No	Yes	HT	CNS	2	Lost	Not Called	Not Called	Not Called	Not Called	Not Called	Not Called	Not Called	Not Called	Not Called	Not Called	Not Called	Not Called	Not Called	Not Called	Not Called	Not Called	Not Called	Not Called	Not Called	Not Called	Not Called	Not Called	Not Called	Not Called	Not Called	Not Called	Not Called	Not Called	Not Called	Not Called	Not Called	Not Called	Not Called	Lost	Not Called	Not Called	Not Called
TCGA-HT-7879	TCGA-HT-7879-01	OAST	Diffuse Glioma	Oligoastrocytoma	Oligoastrocytoma	G3	No	Yes	HT	CNS	1	Not Called	Not Called	Not Called	Not Called	Not Called	Not Called	Not Called	Not Called			Not Called	Not Called	Not Called	Not Called	Not Called	Not Called	Not Called	Not Called			Not Called	Not Called	Gained	Not Called	Not Called	Not Called	Not Called	Not Called	Not Called	Not Called	Not Called	Not Called	Not Called	Not Called	Not Called	Not Called	Not Called	Not Called
TCGA-HT-7880	TCGA-HT-7880-01	OAST	Diffuse Glioma	Oligoastrocytoma	Oligoastrocytoma	G2	No	Yes	HT	CNS	0	Not Called	Not Called	Not Called	Not Called	Not Called	Not Called	Not Called	Not Called	Not Called	Not Called	Not Called	Not Called	Not Called	Not Called	Not Called	Not Called	Not Called	Not Called	Not Called	Not Called	Not Called	Not Called	Not Called	Not Called	Not Called	Not Called	Not Called	Not Called	Not Called	Not Called	Not Called	Not Called	Not Called	Not Called	Not Called	Not Called	Not Called	Not Called
TCGA-HT-7881	TCGA-HT-7881-01	ODG	Diffuse Glioma	Oligodendroglioma	Oligodendroglioma	G2	No	Yes	HT	CNS	2	Lost	Not Called	Not Called	Not Called	Not Called	Not Called	Not Called	Not Called	Not Called	Not Called	Not Called	Not Called	Not Called	Not Called	Not Called	Not Called	Not Called	Not Called	Not Called	Not Called	Not Called	Not Called	Not Called	Not Called	Not Called	Not Called	Not Called	Not Called	Not Called	Not Called	Not Called	Not Called	Not Called	Not Called	Lost	Not Called	Not Called	Not Called
TCGA-HT-7882	TCGA-HT-7882-01	ODG	Diffuse Glioma	Oligodendroglioma	Oligodendroglioma	G3	No	Yes	HT	CNS	8	Not Called	Not Called	Not Called	Not Called	Not Called	Not Called	Not Called	Not Called	Not Called	Not Called	Not Called	Not Called	Gained	Gained	Not Called	Not Called	Not Called	Not Called	Lost	Lost		Not Called	Not Called	Not Called		Not Called	Not Called	Not Called	Not Called	Not Called	Not Called	Not Called	Not Called	Gained	Gained	Gained	Gained	Not Called
TCGA-HT-7884	TCGA-HT-7884-01	DIFG	Diffuse Glioma	Astrocytoma	Astrocytoma	G2	No	Yes	HT	CNS	2	Not Called	Not Called	Not Called	Not Called	Not Called	Not Called	Not Called	Not Called	Not Called	Not Called			Not Called	Not Called	Not Called	Not Called	Not Called	Not Called	Not Called	Not Called	Not Called	Not Called	Gained	Lost	Not Called	Not Called	Not Called	Not Called	Not Called	Not Called	Not Called	Not Called	Not Called	Not Called	Not Called	Not Called	Not Called	Not Called
TCGA-HT-7902	TCGA-HT-7902-01	OAST	Diffuse Glioma	Oligoastrocytoma	Oligoastrocytoma	G2	No	Yes	HT	CNS	6	Not Called	Not Called	Not Called	Not Called	Not Called	Not Called	Not Called	Not Called	Not Called	Lost	Not Called	Not Called	Not Called	Not Called	Not Called	Not Called		Not Called	Not Called		Lost	Not Called	Not Called	Lost	Lost	Lost	Not Called	Not Called	Not Called	Not Called	Not Called	Not Called	Not Called	Not Called	Not Called	Not Called	Not Called	Lost
TCGA-HT-8010	TCGA-HT-8010-01	ODG	Diffuse Glioma	Oligodendroglioma	Oligodendroglioma	G2	No	Yes	HT	CNS	2	Lost	Not Called	Not Called	Not Called	Not Called	Not Called	Not Called	Not Called	Not Called	Not Called	Not Called	Not Called	Not Called	Not Called	Not Called	Not Called	Not Called	Not Called	Not Called	Not Called	Not Called	Not Called	Not Called	Not Called	Not Called	Not Called	Not Called	Not Called	Not Called	Not Called	Not Called	Not Called	Not Called	Not Called	Lost	Not Called	Not Called	Not Called
TCGA-HT-8011	TCGA-HT-8011-01	DIFG	Diffuse Glioma	Astrocytoma	Astrocytoma	G3	No	Yes	HT	CNS	6	Not Called	Not Called	Not Called	Not Called	Not Called	Not Called	Not Called		Not Called	Not Called	Not Called	Not Called	Gained	Gained	Gained	Gained		Not Called	Lost	Lost	Not Called	Not Called	Not Called	Not Called	Not Called	Not Called		Not Called		Not Called	Not Called	Not Called	Not Called	Not Called	Not Called	Not Called	Not Called	Not Called
TCGA-HT-8012	TCGA-HT-8012-01	ODG	Diffuse Glioma	Oligodendroglioma	Oligodendroglioma	G2	No	Yes	HT	CNS	3	Lost	Not Called	Not Called	Not Called	Not Called	Not Called	Not Called	Not Called	Not Called	Not Called	Not Called	Not Called	Not Called	Not Called	Not Called	Not Called	Not Called	Not Called	Not Called	Not Called	Not Called	Not Called	Not Called	Not Called	Not Called	Not Called	Lost	Not Called	Not Called	Not Called	Not Called	Not Called	Not Called	Not Called	Lost	Not Called	Not Called	Not Called
TCGA-HT-8013	TCGA-HT-8013-01	OAST	Diffuse Glioma	Oligoastrocytoma	Oligoastrocytoma	G2	No	Yes	HT	CNS	4	Not Called	Not Called	Not Called	Not Called	Not Called	Not Called	Not Called	Not Called	Not Called	Not Called	Not Called	Not Called	Gained	Gained	Gained	Gained	Not Called	Not Called	Not Called	Not Called	Not Called	Not Called	Not Called	Not Called	Not Called	Not Called	Not Called	Not Called	Not Called	Not Called	Not Called	Not Called	Not Called	Not Called	Not Called	Not Called	Not Called	Not Called
TCGA-HT-8015	TCGA-HT-8015-01	DIFG	Diffuse Glioma	Astrocytoma	Astrocytoma	G2	No	Yes	HT	CNS	0	Not Called	Not Called	Not Called	Not Called	Not Called	Not Called	Not Called	Not Called	Not Called	Not Called	Not Called	Not Called	Not Called	Not Called	Not Called	Not Called	Not Called	Not Called	Not Called	Not Called	Not Called	Not Called	Not Called	Not Called	Not Called	Not Called	Not Called	Not Called	Not Called	Not Called	Not Called	Not Called	Not Called	Not Called	Not Called	Not Called	Not Called	Not Called
TCGA-HT-8018	TCGA-HT-8018-01	OAST	Diffuse Glioma	Oligoastrocytoma	Oligoastrocytoma	G2	No	Yes	HT	CNS	3	Not Called	Not Called	Not Called	Not Called	Not Called	Not Called	Not Called	Not Called	Not Called		Not Called	Not Called	Not Called	Not Called	Not Called	Not Called	Not Called	Not Called	Not Called	Not Called	Lost	Not Called	Gained	Lost	Not Called	Not Called	Not Called	Not Called	Not Called	Not Called	Not Called	Not Called	Not Called	Not Called	Not Called	Not Called	Not Called	Not Called
TCGA-HT-8019	TCGA-HT-8019-01	ODG	Diffuse Glioma	Oligodendroglioma	Oligodendroglioma	G3	No	Yes	HT	CNS
TCGA-HT-8104	TCGA-HT-8104-01	DIFG	Diffuse Glioma	Astrocytoma	Astrocytoma	G3	No	Yes	HT	CNS	7	Not Called		Not Called	Not Called	Not Called	Not Called	Not Called	Not Called	Not Called	Not Called	Not Called	Not Called	Gained	Gained	Not Called	Not Called	Lost	Not Called	Lost	Lost	Not Called	Not Called	Not Called	Not Called	Not Called	Not Called		Not Called	Not Called	Not Called	Not Called	Not Called	Not Called	Gained	Gained	Not Called	Not Called	Not Called
TCGA-HT-8105	TCGA-HT-8105-01	ODG	Diffuse Glioma	Oligodendroglioma	Oligodendroglioma	G3	No	Yes	HT	CNS	2	Lost	Not Called	Not Called	Not Called	Not Called	Not Called	Not Called	Not Called	Not Called	Not Called	Not Called	Not Called	Not Called	Not Called	Not Called	Not Called	Not Called	Not Called	Not Called	Not Called	Not Called	Not Called	Not Called	Not Called	Not Called	Not Called	Not Called	Not Called	Not Called	Not Called	Not Called	Not Called	Not Called	Not Called	Lost	Not Called	Not Called	Not Called
TCGA-HT-8106	TCGA-HT-8106-01	DIFG	Diffuse Glioma	Astrocytoma	Astrocytoma	G3	No	Yes	HT	CNS	7	Not Called		Not Called	Not Called	Not Called	Not Called	Not Called	Not Called	Lost	Lost	Not Called	Not Called	Not Called	Not Called	Not Called		Not Called	Not Called	Gained		Not Called	Not Called		Lost		Not Called	Not Called	Not Called	Not Called	Lost	Lost	Not Called	Not Called	Not Called	Not Called	Not Called	Not Called	Lost
TCGA-HT-8107	TCGA-HT-8107-01	ODG	Diffuse Glioma	Oligodendroglioma	Oligodendroglioma	G2	No	Yes	HT	CNS	0	Not Called	Not Called	Not Called	Not Called	Not Called	Not Called	Not Called	Not Called	Not Called	Not Called	Not Called	Not Called	Not Called	Not Called	Not Called	Not Called	Not Called	Not Called	Not Called	Not Called	Not Called	Not Called	Not Called	Not Called	Not Called	Not Called	Not Called	Not Called	Not Called	Not Called	Not Called	Not Called	Not Called	Not Called	Not Called	Not Called	Not Called	Not Called
TCGA-HT-8108	TCGA-HT-8108-01	ODG	Diffuse Glioma	Oligodendroglioma	Oligodendroglioma	G2	No	Yes	HT	CNS	0	Not Called	Not Called	Not Called	Not Called	Not Called	Not Called	Not Called	Not Called	Not Called	Not Called	Not Called		Not Called		Not Called	Not Called		Not Called	Not Called		Not Called	Not Called	Not Called	Not Called	Not Called	Not Called		Not Called	Not Called	Not Called	Not Called	Not Called	Not Called	Not Called	Not Called	Not Called	Not Called	Not Called
TCGA-HT-8109	TCGA-HT-8109-01	ODG	Diffuse Glioma	Oligodendroglioma	Oligodendroglioma	G3	No	Yes	HT	CNS	2	Lost	Not Called	Not Called	Not Called	Not Called	Not Called	Not Called	Not Called	Not Called	Not Called	Not Called	Not Called	Not Called	Not Called	Not Called	Not Called	Not Called	Not Called	Not Called	Not Called	Not Called	Not Called	Not Called	Not Called	Not Called	Not Called	Not Called	Not Called	Not Called	Not Called	Not Called	Not Called	Not Called	Not Called	Lost	Not Called	Not Called	Not Called
TCGA-HT-8110	TCGA-HT-8110-01	DIFG	Diffuse Glioma	Astrocytoma	Astrocytoma	G3	No	Yes	HT	CNS	5	Not Called	Not Called	Not Called	Not Called	Not Called	Not Called	Not Called	Not Called	Not Called	Not Called	Not Called	Not Called	Gained	Gained		Not Called		Not Called	Lost	Lost	Not Called	Not Called	Not Called	Not Called	Not Called	Lost	Not Called	Not Called	Not Called	Not Called	Not Called	Not Called	Not Called	Not Called	Not Called	Not Called	Not Called	Not Called
TCGA-HT-8111	TCGA-HT-8111-01	OAST	Diffuse Glioma	Oligoastrocytoma	Oligoastrocytoma	G3	No	Yes	HT	CNS	4	Not Called	Not Called	Not Called	Not Called	Not Called	Not Called	Not Called	Not Called	Not Called	Not Called	Not Called	Not Called	Not Called	Not Called	Gained	Gained	Not Called			Not Called	Not Called	Not Called	Not Called	Not Called	Not Called	Not Called	Not Called	Not Called	Not Called	Not Called	Not Called	Gained	Gained	Not Called	Not Called	Not Called	Not Called	Not Called
TCGA-HT-8113	TCGA-HT-8113-01	ODG	Diffuse Glioma	Oligodendroglioma	Oligodendroglioma	G2	No	Yes	HT	CNS	1	Lost	Not Called	Not Called	Not Called	Not Called	Not Called	Not Called	Not Called	Not Called	Not Called	Not Called	Not Called	Not Called	Not Called	Not Called	Not Called	Not Called	Not Called	Not Called	Not Called	Not Called	Not Called	Not Called	Not Called	Not Called	Not Called	Not Called	Not Called	Not Called	Not Called	Not Called	Not Called	Not Called	Not Called		Not Called	Not Called	Not Called
TCGA-HT-8114	TCGA-HT-8114-01	OAST	Diffuse Glioma	Oligoastrocytoma	Oligoastrocytoma	G3	No	Yes	HT	CNS	0	Not Called	Not Called	Not Called	Not Called		Not Called	Not Called	Not Called	Not Called	Not Called	Not Called	Not Called	Not Called		Not Called	Not Called	Not Called	Not Called		Not Called	Not Called	Not Called	Not Called	Not Called	Not Called	Not Called	Not Called	Not Called	Not Called	Not Called	Not Called	Not Called	Not Called	Not Called	Not Called	Not Called	Not Called	Not Called
TCGA-HT-8558	TCGA-HT-8558-01	ODG	Diffuse Glioma	Oligodendroglioma	Oligodendroglioma	G2	No	Yes	HT	CNS
TCGA-HT-8563	TCGA-HT-8563-01	DIFG	Diffuse Glioma	Astrocytoma	Astrocytoma	G3	No	Yes	HT	CNS	2	Not Called	Not Called	Not Called	Not Called	Not Called	Not Called	Not Called	Not Called	Not Called	Not Called		Not Called	Not Called	Not Called	Not Called	Not Called	Not Called	Not Called	Not Called		Lost	Not Called	Not Called					Not Called	Not Called	Not Called	Not Called	Not Called	Not Called	Not Called		Not Called	Gained	Not Called
TCGA-HT-8564	TCGA-HT-8564-01	DIFG	Diffuse Glioma	Astrocytoma	Astrocytoma	G3	No	Yes	HT	CNS	25	Gained	Gained	Gained	Gained	Not Called	Not Called	Gained	Gained	Gained	Gained	Lost	Lost	Gained	Gained	Lost	Lost	Gained	Gained	Not Called	Not Called	Not Called	Not Called	Gained	Gained	Not Called	Lost	Gained	Not Called	Not Called	Not Called		Lost	Lost	Not Called	Not Called	Gained	Gained	Not Called
TCGA-HT-A4DS	TCGA-HT-A4DS-01	DIFG	Diffuse Glioma	Astrocytoma	Astrocytoma	G3	No	Yes	HT	CNS	14	Gained	Gained	Gained	Gained		Gained	Not Called	Not Called	Not Called	Not Called	Lost	Lost	Gained	Gained	Lost	Lost	Not Called	Not Called	Not Called	Not Called	Not Called	Not Called	Not Called	Not Called	Not Called	Lost	Not Called	Not Called	Lost	Lost		Not Called	Not Called	Not Called	Not Called	Not Called	Not Called	Not Called
TCGA-HT-A4DV	TCGA-HT-A4DV-01	ODG	Diffuse Glioma	Oligodendroglioma	Oligodendroglioma	G3	No	Yes	HT	CNS
TCGA-HT-A5R5	TCGA-HT-A5R5-01	ODG	Diffuse Glioma	Oligodendroglioma	Oligodendroglioma	G2	No	Yes	HT	CNS	3	Not Called	Not Called		Not Called	Not Called	Not Called	Not Called	Not Called	Not Called	Not Called	Not Called	Not Called	Gained	Gained	Not Called	Not Called	Not Called	Not Called	Not Called	Not Called	Not Called	Not Called	Not Called	Not Called	Not Called	Not Called	Not Called	Not Called	Not Called	Gained	Not Called	Not Called	Not Called	Not Called	Not Called	Not Called	Not Called	Not Called
TCGA-HT-A5R7	TCGA-HT-A5R7-01	DIFG	Diffuse Glioma	Astrocytoma	Astrocytoma	G3	No	Yes	HT	CNS	1	Not Called	Not Called	Not Called	Not Called	Not Called	Not Called	Not Called	Not Called	Not Called	Not Called	Not Called	Not Called	Not Called	Not Called	Not Called	Not Called	Not Called	Not Called	Not Called	Not Called	Lost	Not Called	Not Called		Not Called	Not Called	Not Called	Not Called	Not Called	Not Called	Not Called	Not Called	Not Called	Not Called	Not Called	Not Called	Not Called	Not Called
TCGA-HT-A5R9	TCGA-HT-A5R9-01	ODG	Diffuse Glioma	Oligodendroglioma	Oligodendroglioma	G3	No	Yes	HT	CNS	6	Lost	Not Called	Not Called	Not Called	Not Called	Not Called	Lost	Lost	Not Called	Not Called	Not Called	Not Called	Gained	Gained	Not Called	Not Called	Not Called	Not Called	Not Called	Not Called	Not Called	Not Called	Not Called	Not Called	Not Called	Not Called	Not Called	Not Called	Not Called	Not Called	Not Called	Not Called	Not Called	Not Called	Lost	Not Called	Not Called	Not Called
TCGA-HT-A5RA	TCGA-HT-A5RA-01	DIFG	Diffuse Glioma	Astrocytoma	Astrocytoma	G3	No	Yes	HT	CNS	7	Not Called	Not Called	Not Called	Not Called		Not Called	Not Called	Not Called	Not Called	Not Called	Not Called	Not Called	Not Called	Gained	Not Called	Not Called	Lost	Not Called	Lost	Lost	Not Called	Not Called	Not Called	Not Called	Not Called	Not Called	Not Called	Not Called	Not Called	Not Called	Not Called	Not Called	Not Called	Gained	Gained	Not Called	Not Called	Gained
TCGA-HT-A5RB	TCGA-HT-A5RB-01	DIFG	Diffuse Glioma	Astrocytoma	Astrocytoma	G2	No	Yes	HT	CNS	0	Not Called	Not Called	Not Called	Not Called	Not Called	Not Called	Not Called	Not Called	Not Called	Not Called	Not Called		Not Called	Not Called	Not Called	Not Called	Not Called	Not Called	Not Called	Not Called	Not Called	Not Called	Not Called	Not Called	Not Called	Not Called	Not Called	Not Called	Not Called	Not Called	Not Called	Not Called	Not Called	Not Called	Not Called	Not Called	Not Called	Not Called
TCGA-HT-A5RC	TCGA-HT-A5RC-01	DIFG	Diffuse Glioma	Astrocytoma	Astrocytoma	G3	No	Yes	HT	CNS	7	Not Called	Not Called	Not Called	Not Called	Not Called	Not Called	Not Called		Not Called	Not Called	Not Called	Not Called	Gained	Gained	Not Called	Not Called		Not Called	Lost	Lost	Not Called	Not Called	Not Called	Not Called	Not Called	Not Called	Not Called	Not Called	Not Called	Not Called	Not Called	Not Called	Not Called	Gained	Not Called	Gained	Gained	Not Called
TCGA-HT-A614	TCGA-HT-A614-01	OAST	Diffuse Glioma	Oligoastrocytoma	Oligoastrocytoma	G2	No	Yes	HT	CNS	2	Not Called	Not Called	Not Called	Not Called	Not Called	Not Called	Not Called	Not Called		Lost	Not Called	Not Called	Not Called	Not Called	Not Called		Not Called	Not Called	Not Called	Not Called	Not Called	Not Called	Gained	Not Called	Not Called	Not Called	Not Called	Not Called	Not Called	Not Called	Not Called	Not Called	Not Called	Not Called	Not Called	Not Called	Not Called	Not Called
TCGA-HT-A615	TCGA-HT-A615-01	ODG	Diffuse Glioma	Oligodendroglioma	Oligodendroglioma	G2	No	Yes	HT	CNS	2	Lost	Not Called	Not Called	Not Called	Not Called	Not Called	Not Called	Not Called	Not Called		Not Called	Not Called	Not Called	Not Called	Not Called	Not Called	Not Called	Not Called	Not Called	Not Called	Not Called	Not Called	Not Called	Not Called	Not Called		Not Called	Not Called	Not Called	Not Called	Not Called	Not Called	Not Called	Not Called	Lost	Not Called	Not Called	Not Called
TCGA-HT-A616	TCGA-HT-A616-01	DIFG	Diffuse Glioma	Astrocytoma	Astrocytoma	G2	No	Yes	HT	CNS	3	Not Called	Not Called	Not Called	Not Called	Not Called	Not Called	Not Called	Not Called	Not Called	Not Called	Not Called	Not Called	Not Called	Gained	Not Called		Not Called	Not Called	Not Called	Not Called	Lost	Not Called	Not Called	Not Called	Not Called	Not Called	Not Called	Not Called	Gained	Not Called	Not Called	Not Called	Not Called	Not Called	Not Called	Not Called	Not Called	Not Called
TCGA-HT-A617	TCGA-HT-A617-01	ODG	Diffuse Glioma	Oligodendroglioma	Oligodendroglioma	G2	No	Yes	HT	CNS	11	Not Called	Not Called	Not Called	Not Called	Not Called	Not Called	Not Called	Not Called	Not Called	Not Called	Lost	Lost	Gained	Gained	Not Called	Not Called	Not Called	Not Called	Lost	Lost	Not Called	Not Called	Not Called	Not Called	Lost	Lost	Not Called	Not Called	Not Called	Not Called	Not Called	Lost	Lost	Not Called	Not Called	Not Called	Not Called	Not Called
TCGA-HT-A618	TCGA-HT-A618-01	DIFG	Diffuse Glioma	Astrocytoma	Astrocytoma	G3	No	Yes	HT	CNS	6	Not Called	Not Called	Not Called	Not Called	Not Called	Not Called	Not Called	Not Called	Not Called		Not Called	Not Called	Not Called		Not Called	Not Called	Not Called	Not Called	Not Called	Not Called	Lost	Not Called	Not Called	Lost	Not Called	Lost	Lost	Not Called		Not Called	Not Called	Not Called	Not Called	Not Called	Not Called	Not Called	Lost	Not Called
TCGA-HT-A61A	TCGA-HT-A61A-01	ODG	Diffuse Glioma	Oligodendroglioma	Oligodendroglioma	G2	No	Yes	HT	CNS
TCGA-HT-A61B	TCGA-HT-A61B-01	DIFG	Diffuse Glioma	Astrocytoma	Astrocytoma	G3	No	Yes	HT	CNS	8	Not Called	Not Called	Lost	Lost	Not Called	Not Called	Not Called	Not Called		Not Called	Not Called	Not Called	Not Called	Not Called	Not Called	Not Called	Not Called	Gained	Not Called	Not Called	Lost		Not Called		Lost	Not Called	Lost	Not Called	Not Called	Not Called	Not Called	Not Called	Not Called		Lost	Not Called	Not Called	Lost
TCGA-HT-A61C	TCGA-HT-A61C-01	ODG	Diffuse Glioma	Oligodendroglioma	Oligodendroglioma	G3	No	Yes	HT	CNS	5		Not Called	Not Called	Not Called	Not Called	Not Called	Not Called	Not Called	Not Called	Not Called	Not Called	Not Called	Gained	Gained	Not Called	Not Called	Not Called	Not Called	Lost	Lost	Not Called	Not Called	Not Called	Not Called	Not Called	Lost	Not Called	Not Called	Not Called	Not Called		Not Called	Not Called	Not Called	Not Called	Not Called	Not Called	Not Called
TCGA-HT-A74H	TCGA-HT-A74H-01	DIFG	Diffuse Glioma	Astrocytoma	Astrocytoma	G3	No	Yes	HT	CNS	7	Not Called	Not Called	Not Called	Not Called	Not Called	Not Called	Not Called	Not Called	Not Called		Not Called	Not Called	Gained	Gained	Not Called	Not Called	Not Called	Not Called	Lost	Lost	Not Called		Not Called	Not Called	Not Called	Not Called		Not Called	Not Called	Not Called	Not Called	Not Called	Not Called	Not Called	Not Called	Gained	Gained	Gained
TCGA-HT-A74J	TCGA-HT-A74J-01	OAST	Diffuse Glioma	Oligoastrocytoma	Oligoastrocytoma	G2	No	Yes	HT	CNS	4	Not Called	Not Called	Not Called	Not Called	Not Called	Not Called	Not Called	Not Called	Not Called	Not Called	Not Called	Not Called	Gained	Gained	Gained	Gained	Not Called	Not Called	Not Called	Not Called	Not Called	Not Called	Not Called	Not Called	Not Called	Not Called	Not Called	Not Called	Not Called	Not Called	Not Called	Not Called	Not Called	Not Called	Not Called	Not Called	Not Called	Not Called
TCGA-HT-A74K	TCGA-HT-A74K-01	ODG	Diffuse Glioma	Oligodendroglioma	Oligodendroglioma	G3	No	Yes	HT	CNS	5	Lost	Not Called	Not Called	Not Called	Not Called	Not Called	Lost	Lost	Not Called	Not Called	Not Called	Not Called	Not Called	Not Called	Not Called	Not Called		Not Called	Not Called	Not Called	Not Called	Not Called	Not Called	Not Called	Not Called	Not Called	Lost	Not Called	Not Called	Not Called	Not Called	Not Called	Not Called	Not Called	Lost	Not Called	Not Called	Not Called
TCGA-HT-A74L	TCGA-HT-A74L-01	OAST	Diffuse Glioma	Oligoastrocytoma	Oligoastrocytoma	G2	No	Yes	HT	CNS	5	Lost	Not Called	Not Called	Not Called	Not Called	Not Called	Not Called	Not Called	Not Called	Not Called	Not Called	Not Called	Not Called		Not Called	Not Called	Not Called	Not Called	Not Called	Not Called	Not Called	Not Called	Not Called	Not Called	Not Called	Not Called	Not Called	Not Called	Not Called	Not Called	Not Called	Lost	Lost	Not Called	Lost	Not Called	Not Called	Gained
TCGA-HT-A74O	TCGA-HT-A74O-01	DIFG	Diffuse Glioma	Astrocytoma	Astrocytoma	G3	No	Yes	HT	CNS	1	Not Called	Not Called	Not Called	Not Called	Not Called	Not Called	Not Called	Not Called		Not Called	Not Called	Not Called	Not Called		Not Called		Not Called	Not Called	Gained	Not Called		Not Called	Not Called	Not Called	Not Called	Not Called	Not Called	Not Called	Not Called	Not Called	Not Called	Not Called	Not Called	Not Called		Not Called	Not Called	Not Called
TCGA-HW-7486	TCGA-HW-7486-01	ODG	Diffuse Glioma	Oligodendroglioma	Oligodendroglioma	G2	NA	NA	HW	CNS	2	Lost	Not Called	Not Called	Not Called	Not Called	Not Called	Not Called	Not Called	Not Called	Not Called	Not Called	Not Called	Not Called	Not Called	Not Called	Not Called	Not Called	Not Called	Not Called	Not Called	Not Called	Not Called	Not Called	Not Called	Not Called	Not Called	Not Called	Not Called	Not Called	Not Called	Not Called	Not Called	Not Called	Not Called	Lost	Not Called	Not Called	Not Called
TCGA-HW-7487	TCGA-HW-7487-01	ODG	Diffuse Glioma	Oligodendroglioma	Oligodendroglioma	G2	NA	NA	HW	CNS	4	Lost	Not Called	Not Called	Not Called	Not Called	Not Called	Lost	Lost	Not Called	Not Called	Not Called	Not Called	Not Called	Not Called	Not Called	Not Called	Not Called	Not Called	Not Called	Not Called	Not Called	Not Called	Not Called	Not Called	Not Called	Not Called	Not Called	Not Called	Not Called	Not Called	Not Called	Not Called	Not Called	Not Called	Lost	Not Called	Not Called	Not Called
TCGA-HW-7489	TCGA-HW-7489-01	OAST	Diffuse Glioma	Oligoastrocytoma	Oligoastrocytoma	G2	NA	NA	HW	CNS	0	Not Called	Not Called	Not Called	Not Called	Not Called	Not Called	Not Called		Not Called		Not Called	Not Called	Not Called	Not Called	Not Called	Not Called	Not Called	Not Called	Not Called	Not Called	Not Called	Not Called	Not Called	Not Called	Not Called	Not Called		Not Called	Not Called	Not Called	Not Called		Not Called	Not Called	Not Called	Not Called	Not Called	Not Called
TCGA-HW-7490	TCGA-HW-7490-01	DIFG	Diffuse Glioma	Astrocytoma	Astrocytoma	G2	NA	NA	HW	CNS	2	Not Called	Not Called	Not Called	Not Called	Not Called	Not Called	Not Called	Not Called	Not Called	Not Called	Not Called	Not Called	Not Called	Not Called	Not Called	Not Called	Not Called	Not Called	Not Called	Not Called	Not Called	Gained	Not Called	Not Called	Not Called	Not Called	Not Called	Not Called	Not Called	Not Called	Not Called	Not Called	Not Called	Not Called	Not Called	Not Called	Not Called	Lost
TCGA-HW-7491	TCGA-HW-7491-01	ODG	Diffuse Glioma	Oligodendroglioma	Oligodendroglioma	G2	NA	NA	HW	CNS	7	Lost	Not Called	Not Called	Not Called	Not Called	Not Called	Lost	Lost	Not Called	Not Called	Not Called	Not Called	Not Called	Not Called	Not Called	Not Called	Not Called	Not Called	Not Called	Not Called	Not Called	Not Called	Not Called	Not Called	Lost	Not Called	Not Called	Not Called	Not Called	Not Called	Not Called	Lost	Lost	Not Called	Lost	Not Called	Not Called	Not Called
TCGA-HW-7493	TCGA-HW-7493-01	DIFG	Diffuse Glioma	Astrocytoma	Astrocytoma	G2	NA	NA	HW	CNS	0	Not Called	Not Called	Not Called	Not Called	Not Called	Not Called	Not Called	Not Called	Not Called	Not Called	Not Called	Not Called	Not Called	Not Called	Not Called	Not Called	Not Called	Not Called		Not Called		Not Called	Not Called	Not Called	Not Called	Not Called	Not Called	Not Called	Not Called	Not Called	Not Called	Not Called	Not Called	Not Called	Not Called	Not Called	Not Called	Not Called
TCGA-HW-7495	TCGA-HW-7495-01	ODG	Diffuse Glioma	Oligodendroglioma	Oligodendroglioma	G2	NA	NA	HW	CNS	2	Lost	Not Called	Not Called	Not Called	Not Called	Not Called	Not Called	Not Called	Not Called	Not Called	Not Called	Not Called	Not Called		Not Called	Not Called	Not Called	Not Called	Not Called	Not Called	Not Called	Not Called	Not Called	Not Called	Not Called	Not Called	Not Called	Not Called	Not Called	Not Called	Not Called	Not Called	Not Called	Not Called	Lost	Not Called	Not Called	Not Called
TCGA-HW-8319	TCGA-HW-8319-01	DIFG	Diffuse Glioma	Astrocytoma	Astrocytoma	G3	Yes	No	HW	CNS	3	Not Called	Not Called	Not Called	Not Called	Not Called	Not Called	Not Called	Not Called	Not Called	Not Called	Not Called	Not Called	Not Called	Not Called	Not Called	Not Called		Gained	Not Called	Not Called	Lost	Gained	Not Called	Not Called	Not Called	Not Called	Not Called	Not Called	Not Called	Not Called	Not Called	Not Called	Not Called	Not Called	Not Called	Not Called	Not Called	Not Called
TCGA-HW-8320	TCGA-HW-8320-01	DIFG	Diffuse Glioma	Astrocytoma	Astrocytoma	G3	Yes	No	HW	CNS	3	Not Called	Not Called	Not Called	Not Called			Not Called	Not Called	Not Called	Not Called	Not Called	Not Called	Not Called	Not Called	Not Called	Not Called	Lost	Not Called	Not Called	Not Called	Not Called	Not Called	Not Called	Not Called	Not Called	Not Called	Not Called	Not Called	Not Called	Gained		Lost		Not Called	Not Called	Not Called	Not Called	Not Called
TCGA-HW-8321	TCGA-HW-8321-01	DIFG	Diffuse Glioma	Astrocytoma	Astrocytoma	G3	Yes	No	HW	CNS	0	Not Called	Not Called	Not Called	Not Called	Not Called		Not Called		Not Called	Not Called	Not Called	Not Called	Not Called	Not Called	Not Called	Not Called	Not Called	Not Called		Not Called	Not Called		Not Called	Not Called	Not Called	Not Called	Not Called	Not Called	Not Called	Not Called	Not Called	Not Called	Not Called	Not Called	Not Called	Not Called	Not Called	Not Called
TCGA-HW-8322	TCGA-HW-8322-01	ODG	Diffuse Glioma	Oligodendroglioma	Oligodendroglioma	G2	Yes	No	HW	CNS	2	Lost	Not Called	Not Called	Not Called	Not Called	Not Called	Not Called	Not Called	Not Called	Not Called		Not Called	Not Called		Not Called	Not Called		Not Called	Not Called	Not Called	Not Called	Not Called	Not Called	Not Called	Not Called	Not Called	Not Called	Not Called	Not Called	Not Called	Not Called	Not Called	Not Called	Not Called	Lost	Not Called	Not Called	Not Called
TCGA-HW-A5KJ	TCGA-HW-A5KJ-01	ODG	Diffuse Glioma	Oligodendroglioma	Oligodendroglioma	G3	Yes	No	HW	CNS	2	Lost	Not Called	Not Called	Not Called	Not Called	Not Called	Not Called	Not Called	Not Called	Not Called	Not Called	Not Called	Not Called		Not Called	Not Called	Not Called	Not Called	Not Called	Not Called	Not Called	Not Called	Not Called	Not Called	Not Called	Not Called	Not Called	Not Called	Not Called	Not Called	Not Called	Not Called		Not Called	Lost	Not Called	Not Called	Not Called
TCGA-HW-A5KK	TCGA-HW-A5KK-01	DIFG	Diffuse Glioma	Astrocytoma	Astrocytoma	G3	Yes	No	HW	CNS	7	Not Called	Not Called	Not Called	Not Called	Not Called	Not Called	Not Called	Not Called	Not Called	Not Called	Not Called	Lost	Not Called	Not Called	Not Called	Not Called	Not Called	Not Called	Lost	Lost	Not Called	Not Called	Not Called	Not Called		Lost	Not Called	Not Called	Not Called	Not Called	Not Called		Not Called	Not Called	Not Called	Gained	Gained	Not Called
TCGA-HW-A5KL	TCGA-HW-A5KL-01	DIFG	Diffuse Glioma	Astrocytoma	Astrocytoma	G2	Yes	No	HW	CNS	0	Not Called	Not Called	Not Called	Not Called	Not Called	Not Called	Not Called	Not Called	Not Called	Not Called	Not Called	Not Called	Not Called	Not Called	Not Called	Not Called	Not Called	Not Called	Not Called	Not Called	Not Called	Not Called	Not Called	Not Called	Not Called	Not Called	Not Called	Not Called	Not Called	Not Called	Not Called	Not Called	Not Called	Not Called	Not Called	Not Called	Not Called	Not Called
TCGA-HW-A5KM	TCGA-HW-A5KM-01	DIFG	Diffuse Glioma	Astrocytoma	Astrocytoma	G2	Yes	No	HW	CNS	2	Not Called	Not Called	Not Called	Not Called	Not Called	Not Called	Not Called	Not Called	Not Called	Not Called	Not Called	Not Called	Not Called		Not Called	Not Called	Lost	Not Called	Not Called	Not Called	Gained	Not Called		Not Called	Not Called	Not Called	Not Called	Not Called	Not Called	Not Called	Not Called	Not Called	Not Called	Not Called	Not Called		Not Called	Not Called
TCGA-IK-7675	TCGA-IK-7675-01	ODG	Diffuse Glioma	Oligodendroglioma	Oligodendroglioma	G2	Yes	No	IK	CNS	2	Not Called	Not Called	Not Called	Not Called	Not Called	Not Called	Not Called		Not Called	Lost		Not Called	Not Called	Not Called	Not Called	Not Called		Not Called			Lost		Not Called		Not Called	Not Called	Not Called	Not Called	Not Called	Not Called		Not Called	Not Called	Not Called	Not Called	Not Called	Not Called	Not Called
TCGA-IK-8125	TCGA-IK-8125-01	OAST	Diffuse Glioma	Oligoastrocytoma	Oligoastrocytoma	G3	Yes	No	IK	CNS	2	Lost	Not Called	Not Called	Not Called	Not Called	Not Called	Not Called	Not Called	Not Called	Not Called	Not Called	Not Called	Not Called	Not Called	Not Called	Not Called	Not Called	Not Called	Not Called	Not Called	Not Called	Not Called	Not Called	Not Called	Not Called	Not Called	Not Called	Not Called	Not Called	Not Called	Not Called	Not Called	Not Called	Not Called	Lost	Not Called	Not Called	Not Called
TCGA-KT-A74X	TCGA-KT-A74X-01	OAST	Diffuse Glioma	Oligoastrocytoma	Oligoastrocytoma	G3	Yes	No	KT	CNS	3	Lost	Not Called	Not Called	Not Called	Not Called	Not Called	Not Called		Not Called	Not Called	Not Called	Not Called	Not Called	Not Called	Not Called	Not Called	Not Called	Not Called	Not Called	Not Called	Not Called	Not Called	Not Called	Not Called	Lost	Not Called	Not Called	Not Called	Not Called	Not Called	Not Called	Not Called	Not Called	Not Called	Lost	Not Called	Not Called	Not Called
TCGA-KT-A7W1	TCGA-KT-A7W1-01	DIFG	Diffuse Glioma	Astrocytoma	Astrocytoma	G3	Yes	No	KT	CNS	6	Not Called	Not Called	Not Called	Not Called	Not Called	Not Called	Not Called	Not Called	Not Called	Not Called	Not Called	Not Called	Gained	Gained	Not Called	Not Called		Not Called	Lost	Lost	Not Called	Not Called	Not Called	Not Called	Not Called	Not Called	Not Called	Not Called	Not Called	Not Called	Not Called	Not Called	Not Called	Gained	Gained	Not Called	Not Called	Not Called
TCGA-P5-A5ET	TCGA-P5-A5ET-01	ODG	Diffuse Glioma	Oligodendroglioma	Oligodendroglioma	G2	Yes	No	P5	CNS	2	Lost	Not Called	Not Called	Not Called	Not Called	Not Called	Not Called	Not Called	Not Called	Not Called	Not Called	Not Called	Not Called	Not Called	Not Called	Not Called	Not Called	Not Called	Not Called	Not Called	Not Called	Not Called	Not Called	Not Called	Not Called	Not Called	Not Called	Not Called	Not Called	Not Called	Not Called	Not Called	Not Called	Not Called	Lost	Not Called	Not Called	Not Called
TCGA-P5-A5EU	TCGA-P5-A5EU-01	DIFG	Diffuse Glioma	Astrocytoma	Astrocytoma	G3	Yes	No	P5	CNS	5	Not Called	Not Called	Not Called	Not Called	Lost	Not Called	Not Called	Not Called	Not Called	Not Called	Not Called	Lost	Not Called	Not Called	Lost	Not Called	Lost	Not Called	Not Called			Not Called	Lost					Not Called	Not Called	Not Called	Not Called	Not Called	Not Called			Not Called	Not Called	Not Called
TCGA-P5-A5EV	TCGA-P5-A5EV-01	DIFG	Diffuse Glioma	Astrocytoma	Astrocytoma	G2	Yes	No	P5	CNS	4	Not Called	Not Called	Not Called	Not Called	Not Called	Not Called	Not Called	Not Called	Not Called	Not Called	Not Called	Lost	Not Called	Gained	Not Called	Not Called	Lost	Not Called	Not Called	Not Called	Not Called	Not Called	Not Called	Not Called	Not Called		Not Called	Not Called	Not Called	Not Called	Not Called	Not Called	Not Called	Not Called			Not Called	Lost
TCGA-P5-A5EW	TCGA-P5-A5EW-01	DIFG	Diffuse Glioma	Astrocytoma	Astrocytoma	G2	Yes	No	P5	CNS	0	Not Called	Not Called	Not Called	Not Called	Not Called	Not Called	Not Called	Not Called	Not Called	Not Called	Not Called	Not Called	Not Called	Not Called	Not Called	Not Called	Not Called	Not Called	Not Called	Not Called	Not Called	Not Called	Not Called	Not Called	Not Called	Not Called	Not Called	Not Called	Not Called	Not Called	Not Called	Not Called	Not Called	Not Called	Not Called		Not Called	Not Called
TCGA-P5-A5EX	TCGA-P5-A5EX-01	ODG	Diffuse Glioma	Oligodendroglioma	Oligodendroglioma	G3	Yes	No	P5	CNS	4	Lost	Not Called	Not Called	Not Called	Not Called	Not Called	Not Called	Not Called	Not Called	Not Called	Not Called	Not Called	Not Called	Not Called	Not Called	Not Called	Not Called	Not Called	Not Called	Not Called	Not Called	Not Called	Not Called	Not Called	Not Called		Not Called		Not Called	Not Called	Not Called	Lost	Lost	Not Called	Lost	Not Called	Not Called	Not Called
TCGA-P5-A5EY	TCGA-P5-A5EY-01	DIFG	Diffuse Glioma	Astrocytoma	Astrocytoma	G2	Yes	No	P5	CNS	0	Not Called	Not Called	Not Called	Not Called	Not Called	Not Called	Not Called	Not Called	Not Called	Not Called	Not Called	Not Called	Not Called	Not Called	Not Called	Not Called	Not Called	Not Called	Not Called	Not Called	Not Called	Not Called	Not Called	Not Called	Not Called	Not Called	Not Called	Not Called	Not Called	Not Called	Not Called	Not Called	Not Called	Not Called	Not Called	Not Called	Not Called	Not Called
TCGA-P5-A5EZ	TCGA-P5-A5EZ-01	DIFG	Diffuse Glioma	Astrocytoma	Astrocytoma	G3	Yes	No	P5	CNS	2	Not Called	Not Called	Not Called	Not Called	Not Called	Not Called	Not Called	Not Called	Not Called	Not Called	Not Called	Lost	Not Called		Not Called	Not Called	Not Called	Not Called		Not Called	Not Called	Not Called	Not Called	Not Called	Not Called		Not Called	Not Called	Not Called	Not Called	Not Called	Lost	Not Called	Not Called		Not Called	Not Called	Not Called
TCGA-P5-A5F0	TCGA-P5-A5F0-01	ODG	Diffuse Glioma	Oligodendroglioma	Oligodendroglioma	G2	Yes	No	P5	CNS	4	Lost	Not Called	Not Called	Not Called	Not Called	Not Called	Not Called	Not Called	Not Called	Not Called	Not Called	Not Called	Gained	Gained	Not Called	Not Called	Not Called	Not Called	Not Called	Not Called	Not Called	Not Called	Not Called	Not Called	Not Called	Not Called	Not Called	Not Called	Not Called	Not Called	Not Called	Not Called	Not Called	Not Called	Lost	Not Called	Not Called	Not Called
TCGA-P5-A5F1	TCGA-P5-A5F1-01	DIFG	Diffuse Glioma	Astrocytoma	Astrocytoma	G2	Yes	No	P5	CNS	2	Not Called	Not Called	Not Called	Not Called	Not Called	Not Called	Not Called	Not Called	Not Called	Not Called	Not Called	Not Called	Not Called		Not Called	Gained	Not Called	Not Called	Gained	Not Called	Not Called	Not Called	Not Called	Not Called	Not Called	Not Called	Not Called	Not Called	Not Called	Not Called	Not Called	Not Called	Not Called	Not Called	Not Called	Not Called	Not Called	Not Called
TCGA-P5-A5F2	TCGA-P5-A5F2-01	DIFG	Diffuse Glioma	Astrocytoma	Astrocytoma	G2	Yes	No	P5	CNS	1	Not Called	Not Called		Not Called		Not Called	Not Called	Not Called	Not Called	Not Called	Not Called	Lost	Not Called	Not Called	Not Called			Not Called	Not Called		Not Called	Not Called	Not Called	Not Called	Not Called		Not Called	Not Called	Not Called	Not Called	Not Called	Not Called	Not Called	Not Called		Not Called	Not Called	Not Called
TCGA-P5-A5F4	TCGA-P5-A5F4-01	ODG	Diffuse Glioma	Oligodendroglioma	Oligodendroglioma	G3	Yes	No	P5	CNS	5		Lost	Not Called	Not Called	Not Called	Not Called	Not Called	Not Called		Not Called	Not Called	Lost	Not Called	Not Called	Not Called		Lost	Not Called	Not Called	Not Called	Not Called	Not Called	Not Called		Lost	Not Called	Not Called	Not Called	Not Called	Not Called	Not Called	Not Called	Not Called	Not Called	Not Called	Not Called	Not Called	Lost
TCGA-P5-A5F6	TCGA-P5-A5F6-01	ODG	Diffuse Glioma	Oligodendroglioma	Oligodendroglioma	G2	Yes	No	P5	CNS	18	Not Called	Not Called	Lost	Lost	Lost	Lost	Not Called	Not Called	Not Called	Not Called	Lost	Lost			Lost	Lost	Lost	Lost	Not Called	Not Called	Lost	Lost	Not Called	Not Called	Not Called	Not Called	Not Called	Not Called	Not Called	Lost	Lost	Not Called	Not Called	Lost	Lost	Not Called	Not Called	Lost
TCGA-P5-A72U	TCGA-P5-A72U-01	ODG	Diffuse Glioma	Oligodendroglioma	Oligodendroglioma	G3	Yes	No	P5	CNS	7	Not Called	Not Called	Not Called	Not Called	Not Called	Not Called	Not Called	Not Called	Not Called	Not Called	Not Called	Not Called	Gained	Gained	Not Called			Not Called	Lost	Lost	Not Called	Not Called	Not Called	Not Called	Not Called	Not Called	Not Called	Not Called	Not Called	Not Called	Not Called	Not Called	Not Called	Gained	Gained	Not Called	Not Called	Not Called
TCGA-P5-A72W	TCGA-P5-A72W-01	DIFG	Diffuse Glioma	Astrocytoma	Astrocytoma	G3	Yes	No	P5	CNS	4	Not Called	Not Called	Not Called	Not Called	Not Called	Not Called		Not Called	Lost		Not Called	Lost	Not Called	Not Called	Not Called		Not Called	Not Called	Not Called		Not Called	Gained	Not Called	Not Called	Lost	Not Called	Not Called	Not Called	Not Called	Not Called	Not Called	Not Called	Not Called	Not Called	Not Called	Not Called	Not Called	Not Called
TCGA-P5-A72X	TCGA-P5-A72X-01	DIFG	Diffuse Glioma	Astrocytoma	Astrocytoma	G3	Yes	No	P5	CNS	1	Not Called	Not Called	Not Called	Not Called	Not Called	Not Called	Not Called	Not Called	Not Called	Not Called	Not Called	Not Called	Not Called	Not Called	Not Called	Not Called	Not Called	Not Called	Gained	Not Called	Not Called	Not Called	Not Called	Not Called	Not Called	Not Called	Not Called	Not Called	Not Called	Not Called	Not Called	Not Called	Not Called	Not Called	Not Called	Not Called	Not Called	Not Called
TCGA-P5-A72Z	TCGA-P5-A72Z-01	ODG	Diffuse Glioma	Oligodendroglioma	Oligodendroglioma	G3	Yes	No	P5	CNS	6	Lost	Not Called	Not Called	Not Called	Not Called	Not Called	Not Called	Not Called	Not Called	Not Called	Not Called	Not Called	Not Called	Not Called	Not Called	Not Called	Lost	Lost	Not Called	Not Called	Not Called	Not Called	Not Called	Not Called	Not Called	Not Called	Not Called	Not Called	Not Called	Not Called	Not Called	Lost	Lost	Not Called	Lost	Not Called	Not Called	Not Called
TCGA-P5-A730	TCGA-P5-A730-01	OAST	Diffuse Glioma	Oligoastrocytoma	Oligoastrocytoma	G3	Yes	No	P5	CNS	2	Lost	Not Called	Not Called	Not Called	Not Called	Not Called	Not Called	Not Called	Not Called	Not Called	Not Called	Not Called	Not Called	Not Called	Not Called	Not Called	Not Called	Not Called	Not Called	Not Called	Not Called	Not Called	Not Called	Not Called	Not Called	Not Called	Not Called	Not Called	Not Called	Not Called	Not Called	Not Called	Not Called	Not Called	Lost	Not Called	Not Called	Not Called
TCGA-P5-A731	TCGA-P5-A731-01	OAST	Diffuse Glioma	Oligoastrocytoma	Oligoastrocytoma	G2	Yes	No	P5	CNS	0		Not Called	Not Called	Not Called	Not Called	Not Called	Not Called	Not Called	Not Called	Not Called	Not Called	Not Called	Not Called		Not Called	Not Called	Not Called	Not Called	Not Called	Not Called	Not Called	Not Called	Not Called	Not Called	Not Called	Not Called	Not Called	Not Called	Not Called	Not Called	Not Called	Not Called	Not Called	Not Called		Not Called	Not Called	Not Called
TCGA-P5-A733	TCGA-P5-A733-01	DIFG	Diffuse Glioma	Astrocytoma	Astrocytoma	G2	Yes	No	P5	CNS	2	Not Called	Not Called	Lost	Not Called	Not Called	Not Called	Not Called		Not Called	Not Called	Not Called	Not Called	Not Called		Not Called	Not Called	Not Called	Lost	Not Called	Not Called	Not Called	Not Called	Not Called	Not Called	Not Called	Not Called	Not Called	Not Called	Not Called	Not Called	Not Called	Not Called	Not Called	Not Called	Not Called	Not Called	Not Called	Not Called
TCGA-P5-A735	TCGA-P5-A735-01	DIFG	Diffuse Glioma	Astrocytoma	Astrocytoma	G2	Yes	No	P5	CNS	0	Not Called	Not Called	Not Called	Not Called	Not Called	Not Called	Not Called	Not Called	Not Called	Not Called	Not Called	Not Called	Not Called	Not Called	Not Called	Not Called	Not Called	Not Called	Not Called	Not Called	Not Called	Not Called	Not Called	Not Called	Not Called	Not Called	Not Called	Not Called	Not Called	Not Called	Not Called	Not Called	Not Called	Not Called	Not Called	Not Called	Not Called	Not Called
TCGA-P5-A736	TCGA-P5-A736-01	DIFG	Diffuse Glioma	Astrocytoma	Astrocytoma	G3	Yes	No	P5	CNS	0	Not Called	Not Called	Not Called	Not Called	Not Called	Not Called	Not Called	Not Called	Not Called	Not Called	Not Called	Not Called	Not Called		Not Called	Not Called	Not Called	Not Called	Not Called	Not Called	Not Called	Not Called	Not Called	Not Called	Not Called	Not Called	Not Called	Not Called	Not Called	Not Called		Not Called	Not Called	Not Called	Not Called	Not Called	Not Called	Not Called
TCGA-P5-A737	TCGA-P5-A737-01	OAST	Diffuse Glioma	Oligoastrocytoma	Oligoastrocytoma	G2	Yes	No	P5	CNS	3	Lost	Not Called	Not Called	Not Called	Not Called	Not Called	Not Called	Not Called	Not Called	Not Called	Not Called	Not Called	Not Called	Not Called	Not Called	Not Called	Not Called	Not Called	Not Called	Not Called	Not Called	Not Called	Not Called	Not Called	Lost	Not Called	Not Called	Not Called	Not Called	Not Called	Not Called	Not Called	Not Called	Not Called	Lost	Not Called	Not Called	Not Called
TCGA-P5-A77W	TCGA-P5-A77W-01	OAST	Diffuse Glioma	Oligoastrocytoma	Oligoastrocytoma	G3	Yes	No	P5	CNS	8	Lost	Not Called	Not Called	Not Called	Lost	Lost	Lost	Lost	Not Called	Not Called	Not Called	Not Called	Not Called	Not Called	Not Called	Not Called	Not Called	Not Called	Not Called	Not Called	Not Called	Not Called	Not Called	Not Called	Not Called		Lost	Not Called	Not Called	Not Called	Not Called	Not Called	Not Called	Not Called	Lost	Not Called	Not Called	Lost
TCGA-P5-A77X	TCGA-P5-A77X-01	OAST	Diffuse Glioma	Oligoastrocytoma	Oligoastrocytoma	G2	Yes	No	P5	CNS	4	Lost	Not Called	Not Called	Not Called	Not Called	Not Called	Not Called	Not Called	Not Called	Not Called	Not Called	Not Called	Not Called	Not Called	Not Called	Not Called	Not Called	Not Called	Not Called	Not Called	Not Called	Not Called	Not Called	Not Called	Not Called	Lost	Not Called	Not Called	Not Called	Not Called	Not Called	Not Called	Not Called	Not Called	Lost	Not Called	Not Called	Not Called
TCGA-P5-A780	TCGA-P5-A780-01	DIFG	Diffuse Glioma	Astrocytoma	Astrocytoma	G3	Yes	No	P5	CNS	10	Not Called		Not Called	Not Called	Lost	Lost	Not Called	Lost	Lost	Not Called		Lost	Not Called	Not Called	Not Called	Not Called	Lost	Not Called	Gained	Lost	Not Called	Not Called	Not Called	Not Called	Not Called	Not Called		Not Called	Lost	Not Called	Not Called	Lost		Not Called		Not Called	Not Called	Not Called
TCGA-P5-A781	TCGA-P5-A781-01	DIFG	Diffuse Glioma	Astrocytoma	Astrocytoma	G3	Yes	No	P5	CNS	2	Lost	Not Called	Not Called	Not Called	Not Called	Not Called	Not Called		Not Called	Not Called	Not Called	Not Called	Not Called	Not Called	Not Called	Not Called	Not Called	Not Called	Not Called	Not Called	Not Called	Not Called	Not Called	Not Called	Not Called	Not Called	Not Called	Not Called	Not Called	Not Called	Not Called	Not Called	Not Called	Not Called	Lost	Not Called	Not Called	Not Called
TCGA-QH-A65R	TCGA-QH-A65R-01	ODG	Diffuse Glioma	Oligodendroglioma	Oligodendroglioma	G3	No	Yes	QH	CNS	4	Lost	Not Called	Not Called	Not Called	Not Called	Not Called	Not Called	Not Called	Not Called	Not Called	Not Called	Not Called	Not Called	Not Called	Not Called	Not Called	Not Called	Not Called	Not Called	Not Called	Not Called	Not Called	Not Called	Not Called	Not Called	Not Called	Not Called	Not Called	Not Called	Not Called	Not Called	Lost	Lost	Not Called	Lost	Not Called	Not Called	Not Called
TCGA-QH-A65S	TCGA-QH-A65S-01	OAST	Diffuse Glioma	Oligoastrocytoma	Oligoastrocytoma	G2	No	Yes	QH	CNS	5	Not Called	Lost	Not Called	Not Called	Not Called	Not Called	Not Called	Not Called	Gained	Lost	Not Called	Not Called	Not Called	Not Called	Not Called	Not Called	Not Called	Not Called	Not Called	Not Called	Lost	Gained	Not Called	Not Called		Not Called	Not Called	Not Called	Not Called	Not Called	Not Called	Not Called	Not Called	Not Called	Not Called	Not Called	Not Called	Not Called
TCGA-QH-A65V	TCGA-QH-A65V-01	ODG	Diffuse Glioma	Oligodendroglioma	Oligodendroglioma	G2	Yes	No	QH	CNS	2	Lost	Not Called	Not Called	Not Called	Not Called	Not Called	Not Called	Not Called	Not Called	Not Called	Not Called	Not Called	Not Called	Not Called	Not Called	Not Called	Not Called	Not Called	Not Called	Not Called	Not Called	Not Called	Not Called	Not Called	Not Called	Not Called	Not Called	Not Called	Not Called	Not Called	Not Called	Not Called	Not Called	Not Called	Lost	Not Called	Not Called	Not Called
TCGA-QH-A65X	TCGA-QH-A65X-01	OAST	Diffuse Glioma	Oligoastrocytoma	Oligoastrocytoma	G3	Yes	No	QH	CNS	4	Lost	Not Called	Not Called	Not Called	Not Called	Not Called	Not Called	Not Called	Not Called	Not Called	Not Called	Not Called	Not Called	Not Called	Not Called	Not Called	Not Called	Not Called	Not Called	Not Called	Gained	Gained	Not Called	Not Called	Not Called	Not Called	Not Called	Not Called	Not Called	Not Called	Not Called	Not Called	Not Called	Not Called	Lost	Not Called	Not Called	Not Called
TCGA-QH-A65Z	TCGA-QH-A65Z-01	ODG	Diffuse Glioma	Oligodendroglioma	Oligodendroglioma	G2	Yes	No	QH	CNS	3	Lost	Not Called	Not Called	Not Called	Not Called	Not Called	Not Called	Not Called	Not Called	Not Called	Not Called	Not Called	Not Called	Not Called	Not Called	Not Called	Not Called	Not Called	Not Called	Not Called	Not Called	Not Called	Not Called	Not Called	Lost	Not Called	Not Called	Not Called	Not Called	Not Called	Not Called	Not Called	Not Called	Not Called	Lost	Not Called	Not Called	Not Called
TCGA-QH-A6CS	TCGA-QH-A6CS-01	DIFG	Diffuse Glioma	Astrocytoma	Astrocytoma	G3	Yes	No	QH	CNS	11	Not Called	Not Called	Not Called	Not Called	Not Called	Not Called	Not Called	Not Called	Not Called	Not Called	Lost	Lost	Gained	Gained	Not Called	Not Called	Not Called	Not Called	Lost	Lost	Not Called	Lost	Not Called	Not Called	Not Called	Lost	Not Called	Not Called	Not Called	Not Called	Not Called	Gained	Gained	Not Called	Not Called	Not Called	Not Called	Not Called
TCGA-QH-A6CU	TCGA-QH-A6CU-01	ODG	Diffuse Glioma	Oligodendroglioma	Oligodendroglioma	G3	Yes	No	QH	CNS	2	Lost	Not Called	Not Called	Not Called	Not Called	Not Called	Not Called	Not Called	Not Called	Not Called	Not Called	Not Called	Not Called		Not Called	Not Called	Not Called	Not Called	Not Called	Not Called	Not Called	Not Called	Not Called	Not Called	Not Called	Not Called	Not Called	Not Called	Not Called	Not Called	Not Called	Not Called	Not Called		Lost	Not Called	Not Called	Not Called
TCGA-QH-A6CV	TCGA-QH-A6CV-01	OAST	Diffuse Glioma	Oligoastrocytoma	Oligoastrocytoma	G3	Yes	No	QH	CNS	33	Not Called	Not Called	Lost	Lost	Lost	Lost	Lost	Lost	Gained	Gained	Lost	Lost	Gained	Gained	Lost	Lost	Lost	Lost	Lost	Lost	Lost	Lost	Not Called	Not Called	Lost	Lost	Lost	Lost	Lost	Lost		Lost	Lost	Gained	Gained	Gained	Gained	Not Called
TCGA-QH-A6CW	TCGA-QH-A6CW-01	OAST	Diffuse Glioma	Oligoastrocytoma	Oligoastrocytoma	G3	Yes	No	QH	CNS	0	Not Called	Not Called	Not Called	Not Called	Not Called	Not Called	Not Called	Not Called	Not Called	Not Called	Not Called	Not Called	Not Called	Not Called	Not Called		Not Called	Not Called	Not Called	Not Called	Not Called	Not Called	Not Called	Not Called	Not Called	Not Called	Not Called	Not Called	Not Called	Not Called	Not Called	Not Called	Not Called	Not Called	Not Called	Not Called	Not Called	Not Called
TCGA-QH-A6CX	TCGA-QH-A6CX-01	DIFG	Diffuse Glioma	Astrocytoma	Astrocytoma	G2	Yes	No	QH	CNS	4	Not Called	Not Called	Not Called	Not Called	Not Called	Not Called	Not Called	Not Called	Not Called	Not Called	Lost	Lost	Not Called	Gained	Not Called	Not Called		Not Called	Not Called	Lost	Not Called	Not Called	Not Called	Not Called	Not Called	Not Called	Not Called	Not Called	Not Called	Not Called	Not Called	Not Called	Not Called	Not Called	Not Called	Not Called	Not Called	Not Called
TCGA-QH-A6CY	TCGA-QH-A6CY-01	OAST	Diffuse Glioma	Oligoastrocytoma	Oligoastrocytoma	G3	Yes	No	QH	CNS	3	Lost	Not Called	Not Called	Not Called	Not Called	Not Called	Not Called	Not Called	Not Called	Not Called	Not Called	Not Called	Not Called	Not Called	Not Called	Not Called	Not Called	Not Called	Not Called	Not Called	Not Called	Not Called	Not Called	Not Called	Lost	Not Called	Not Called	Not Called	Not Called	Not Called	Not Called	Not Called	Not Called	Not Called	Lost	Not Called	Not Called	Not Called
TCGA-QH-A6CZ	TCGA-QH-A6CZ-01	OAST	Diffuse Glioma	Oligoastrocytoma	Oligoastrocytoma	G2	Yes	No	QH	CNS	4	Lost	Not Called	Not Called	Not Called	Not Called	Not Called	Not Called	Not Called	Not Called	Not Called	Not Called	Not Called	Not Called	Not Called	Not Called	Not Called	Not Called	Not Called	Not Called	Not Called	Not Called	Not Called	Not Called	Not Called	Not Called	Lost	Not Called	Not Called	Not Called	Not Called	Not Called	Not Called	Not Called	Not Called	Lost	Not Called	Not Called	Not Called
TCGA-QH-A6X3	TCGA-QH-A6X3-01	OAST	Diffuse Glioma	Oligoastrocytoma	Oligoastrocytoma	G2	Yes	No	QH	CNS	0	Not Called	Not Called	Not Called	Not Called	Not Called	Not Called	Not Called	Not Called	Not Called	Not Called	Not Called	Not Called	Not Called		Not Called	Not Called	Not Called	Not Called	Not Called		Not Called	Not Called	Not Called	Not Called	Not Called	Not Called	Not Called	Not Called	Not Called	Not Called	Not Called	Not Called	Not Called	Not Called	Not Called	Not Called	Not Called	Not Called
TCGA-QH-A6X4	TCGA-QH-A6X4-01	OAST	Diffuse Glioma	Oligoastrocytoma	Oligoastrocytoma	G3	Yes	No	QH	CNS	3	Lost	Not Called	Not Called	Not Called	Not Called	Not Called	Not Called	Lost	Not Called	Not Called	Not Called	Not Called	Not Called	Not Called	Not Called	Not Called	Not Called	Not Called	Not Called	Not Called	Not Called	Not Called	Not Called	Not Called	Not Called		Not Called	Not Called	Not Called	Not Called	Not Called	Not Called	Not Called	Not Called	Lost	Not Called	Not Called	Not Called
TCGA-QH-A6X5	TCGA-QH-A6X5-01	OAST	Diffuse Glioma	Oligoastrocytoma	Oligoastrocytoma	G2	Yes	No	QH	CNS	2	Lost	Not Called	Not Called	Not Called	Not Called	Not Called	Not Called	Not Called	Not Called	Not Called	Not Called	Not Called	Not Called	Not Called	Not Called	Not Called	Not Called	Not Called	Not Called	Not Called	Not Called	Not Called	Not Called	Not Called	Not Called	Not Called	Not Called	Not Called	Not Called	Not Called	Not Called	Not Called	Not Called	Not Called	Lost	Not Called	Not Called	Not Called
TCGA-QH-A6X8	TCGA-QH-A6X8-01	ODG	Diffuse Glioma	Oligodendroglioma	Oligodendroglioma	G3	Yes	No	QH	CNS	4	Lost	Not Called	Not Called	Not Called	Not Called	Not Called	Not Called	Not Called	Not Called	Not Called	Not Called	Not Called	Not Called	Not Called	Not Called	Not Called	Not Called	Not Called	Not Called	Not Called	Not Called	Not Called	Not Called	Not Called	Lost	Not Called	Lost	Not Called	Not Called	Not Called	Not Called	Not Called	Not Called	Not Called	Lost	Not Called	Not Called	Not Called
TCGA-QH-A6X9	TCGA-QH-A6X9-01	ODG	Diffuse Glioma	Oligodendroglioma	Oligodendroglioma	G2	Yes	No	QH	CNS	1	Not Called	Not Called	Not Called	Not Called		Not Called	Not Called	Not Called	Not Called	Not Called	Not Called	Not Called	Gained		Not Called	Not Called		Not Called	Not Called		Not Called		Not Called	Not Called		Not Called	Not Called	Not Called	Not Called	Not Called	Not Called	Not Called	Not Called	Not Called		Not Called	Not Called	Not Called
TCGA-QH-A6XA	TCGA-QH-A6XA-01	OAST	Diffuse Glioma	Oligoastrocytoma	Oligoastrocytoma	G2	Yes	No	QH	CNS	2	Not Called	Not Called	Not Called	Not Called	Not Called	Not Called	Not Called	Lost	Not Called	Not Called	Not Called	Not Called	Not Called		Not Called		Not Called	Not Called		Not Called		Not Called	Not Called	Not Called	Not Called	Not Called	Not Called	Not Called	Not Called	Gained	Not Called	Not Called	Not Called	Not Called	Not Called	Not Called	Not Called	Not Called
TCGA-QH-A6XC	TCGA-QH-A6XC-01	DIFG	Diffuse Glioma	Astrocytoma	Astrocytoma	G3	Yes	No	QH	CNS	8	Not Called	Not Called	Not Called	Not Called	Not Called	Not Called	Not Called	Not Called	Not Called	Not Called	Not Called	Not Called	Gained	Gained	Not Called	Not Called	Not Called	Not Called	Lost	Lost	Not Called	Not Called	Not Called	Not Called	Not Called	Not Called	Not Called	Not Called	Not Called	Not Called	Not Called	Not Called	Not Called	Gained	Gained	Gained	Gained	Not Called
TCGA-QH-A86X	TCGA-QH-A86X-01	ODG	Diffuse Glioma	Oligodendroglioma	Oligodendroglioma	G2	Yes	No	QH	CNS	2	Lost	Not Called	Not Called	Not Called	Not Called	Not Called	Not Called	Not Called	Not Called	Not Called	Not Called	Not Called	Not Called	Not Called	Not Called	Not Called	Not Called	Not Called	Not Called	Not Called	Not Called	Not Called	Not Called	Not Called	Not Called	Not Called	Not Called	Not Called	Not Called	Not Called	Not Called	Not Called	Not Called	Not Called	Lost	Not Called	Not Called	Not Called
TCGA-QH-A870	TCGA-QH-A870-01	OAST	Diffuse Glioma	Oligoastrocytoma	Oligoastrocytoma	G3	Yes	No	QH	CNS	0	Not Called	Not Called	Not Called	Not Called	Not Called	Not Called	Not Called	Not Called	Not Called		Not Called		Not Called		Not Called	Not Called	Not Called	Not Called	Not Called	Not Called	Not Called	Not Called	Not Called	Not Called	Not Called		Not Called	Not Called	Not Called	Not Called	Not Called	Not Called	Not Called	Not Called		Not Called	Not Called	Not Called
TCGA-R8-A6MK	TCGA-R8-A6MK-01	ODG	Diffuse Glioma	Oligodendroglioma	Oligodendroglioma	G2	No	Yes	R8	CNS	2	Lost	Not Called	Not Called	Not Called	Not Called	Not Called	Not Called	Not Called	Not Called	Not Called	Not Called	Not Called	Not Called	Not Called	Not Called	Not Called	Not Called	Not Called	Not Called	Not Called	Not Called	Not Called	Not Called	Not Called	Not Called		Not Called	Not Called	Not Called	Not Called	Not Called	Not Called	Not Called	Not Called	Lost	Not Called	Not Called	Not Called
TCGA-R8-A6ML	TCGA-R8-A6ML-01	ODG	Diffuse Glioma	Oligodendroglioma	Oligodendroglioma	G3	No	Yes	R8	CNS	2	Lost	Not Called	Not Called	Not Called	Not Called	Not Called	Not Called	Not Called	Not Called	Not Called	Not Called	Not Called	Not Called	Not Called	Not Called	Not Called	Not Called	Not Called	Not Called	Not Called	Not Called	Not Called	Not Called	Not Called	Not Called	Not Called	Not Called	Not Called	Not Called	Not Called	Not Called	Not Called	Not Called	Not Called	Lost	Not Called	Not Called	Not Called
TCGA-R8-A6MO	TCGA-R8-A6MO-01	ODG	Diffuse Glioma	Oligodendroglioma	Oligodendroglioma	G2	No	Yes	R8	CNS	2	Lost	Not Called	Not Called	Not Called	Not Called	Not Called	Not Called	Not Called	Not Called	Not Called	Not Called	Not Called	Not Called	Not Called	Not Called	Not Called	Not Called	Not Called	Not Called	Not Called	Not Called	Not Called	Not Called	Not Called	Not Called	Not Called	Not Called	Not Called	Not Called	Not Called	Not Called	Not Called	Not Called	Not Called	Lost	Not Called	Not Called	Not Called
TCGA-RY-A83X	TCGA-RY-A83X-01	ODG	Diffuse Glioma	Oligodendroglioma	Oligodendroglioma	G2	Yes	No	RY	CNS	3	Lost	Not Called	Not Called	Not Called	Not Called	Not Called	Not Called	Not Called	Not Called	Not Called	Not Called	Not Called	Not Called	Not Called	Not Called	Not Called	Not Called	Not Called	Not Called		Not Called	Not Called	Not Called	Not Called	Not Called	Not Called	Lost	Not Called	Not Called	Not Called	Not Called	Not Called	Not Called	Not Called	Lost	Not Called	Not Called	Not Called
TCGA-RY-A83Y	TCGA-RY-A83Y-01	ODG	Diffuse Glioma	Oligodendroglioma	Oligodendroglioma	G2	Yes	No	RY	CNS	2	Lost	Not Called	Not Called	Not Called	Not Called	Not Called	Not Called	Not Called	Not Called	Not Called	Not Called	Not Called	Not Called	Not Called	Not Called	Not Called	Not Called	Not Called	Not Called	Not Called	Not Called	Not Called	Not Called	Not Called	Not Called	Not Called	Not Called	Not Called	Not Called	Not Called	Not Called	Not Called	Not Called	Not Called	Lost	Not Called	Not Called	Not Called
TCGA-RY-A83Z	TCGA-RY-A83Z-01	DIFG	Diffuse Glioma	Astrocytoma	Astrocytoma	G3	Yes	No	RY	CNS	4	Not Called	Not Called	Not Called		Not Called	Not Called	Not Called		Lost		Not Called		Not Called	Not Called	Not Called		Lost	Not Called		Lost	Lost	Not Called	Not Called	Not Called	Not Called		Not Called	Not Called	Not Called	Not Called	Not Called	Not Called	Not Called	Not Called		Not Called	Not Called	Not Called
TCGA-RY-A840	TCGA-RY-A840-01	ODG	Diffuse Glioma	Oligodendroglioma	Oligodendroglioma	G3	Yes	No	RY	CNS	4	Lost	Not Called	Not Called	Not Called	Not Called	Not Called	Not Called	Not Called	Not Called	Not Called	Not Called	Not Called	Not Called	Not Called	Not Called	Not Called	Not Called	Not Called	Not Called	Not Called	Not Called	Gained	Not Called	Not Called	Not Called	Lost	Not Called	Not Called	Not Called	Not Called		Not Called	Not Called	Not Called	Lost	Not Called	Not Called	Not Called
TCGA-RY-A843	TCGA-RY-A843-01	DIFG	Diffuse Glioma	Astrocytoma	Astrocytoma	G3	Yes	No	RY	CNS	0	Not Called	Not Called	Not Called	Not Called	Not Called	Not Called	Not Called	Not Called	Not Called	Not Called	Not Called	Not Called	Not Called	Not Called	Not Called	Not Called	Not Called	Not Called	Not Called	Not Called	Not Called	Not Called	Not Called	Not Called	Not Called	Not Called	Not Called	Not Called	Not Called	Not Called	Not Called	Not Called	Not Called	Not Called	Not Called	Not Called	Not Called	Not Called
TCGA-RY-A845	TCGA-RY-A845-01	OAST	Diffuse Glioma	Oligoastrocytoma	Oligoastrocytoma	G2	Yes	No	RY	CNS	2	Not Called	Not Called	Not Called	Not Called	Not Called	Not Called	Not Called	Not Called	Not Called	Not Called	Not Called	Not Called	Gained	Gained	Not Called	Not Called	Not Called	Not Called	Not Called	Not Called	Not Called	Not Called	Not Called	Not Called	Not Called	Not Called	Not Called	Not Called	Not Called	Not Called	Not Called	Not Called	Not Called	Not Called	Not Called	Not Called	Not Called	Not Called
TCGA-RY-A847	TCGA-RY-A847-01	ODG	Diffuse Glioma	Oligodendroglioma	Oligodendroglioma	G2	Yes	No	RY	CNS	2	Lost	Not Called	Not Called	Not Called	Not Called	Not Called	Not Called	Not Called	Not Called	Not Called	Not Called	Not Called	Not Called	Not Called	Not Called	Not Called	Not Called	Not Called	Not Called	Not Called	Not Called	Not Called	Not Called	Not Called	Not Called	Not Called	Not Called	Not Called	Not Called	Not Called	Not Called	Not Called	Not Called	Not Called	Lost	Not Called	Not Called	Not Called
TCGA-S9-A6TS	TCGA-S9-A6TS-01	DIFG	Diffuse Glioma	Astrocytoma	Astrocytoma	G3	No	Yes	S9	CNS	1	Not Called	Not Called	Not Called	Not Called	Not Called	Not Called	Not Called	Not Called	Not Called	Not Called	Not Called	Not Called	Not Called	Not Called	Not Called	Not Called		Not Called	Not Called	Not Called	Not Called	Not Called	Not Called	Not Called	Not Called	Not Called	Lost	Not Called	Not Called	Not Called	Not Called	Not Called	Not Called	Not Called	Not Called	Not Called	Not Called	Not Called
TCGA-S9-A6TU	TCGA-S9-A6TU-01	DIFG	Diffuse Glioma	Astrocytoma	Astrocytoma	G2	No	Yes	S9	CNS	1	Not Called	Not Called	Not Called	Not Called	Not Called	Not Called	Gained	Not Called	Not Called	Not Called	Not Called	Not Called	Not Called	Not Called	Not Called	Not Called	Not Called	Not Called	Not Called	Not Called	Not Called		Not Called	Not Called	Not Called	Not Called	Not Called	Not Called	Not Called	Not Called	Not Called	Not Called	Not Called	Not Called	Not Called	Not Called	Not Called	Not Called
TCGA-S9-A6TV	TCGA-S9-A6TV-01	OAST	Diffuse Glioma	Oligoastrocytoma	Oligoastrocytoma	G3	No	Yes	S9	CNS	0	Not Called	Not Called	Not Called	Not Called	Not Called		Not Called	Not Called	Not Called		Not Called	Not Called	Not Called	Not Called	Not Called	Not Called	Not Called	Not Called	Not Called	Not Called			Not Called			Not Called	Not Called	Not Called	Not Called	Not Called	Not Called	Not Called	Not Called	Not Called		Not Called	Not Called	Not Called
TCGA-S9-A6TW	TCGA-S9-A6TW-01	ODG	Diffuse Glioma	Oligodendroglioma	Oligodendroglioma	G3	No	Yes	S9	CNS	10	Lost	Not Called	Not Called	Not Called	Not Called	Not Called	Lost	Lost	Not Called	Not Called	Not Called	Not Called	Not Called	Not Called	Not Called	Not Called	Lost	Gained	Not Called	Not Called	Gained	Gained	Not Called	Not Called	Not Called	Not Called	Not Called	Not Called	Not Called	Not Called	Not Called	Lost	Lost	Not Called	Lost	Not Called	Not Called	Not Called
TCGA-S9-A6TX	TCGA-S9-A6TX-01	ODG	Diffuse Glioma	Oligodendroglioma	Oligodendroglioma	G3	No	Yes	S9	CNS	4	Lost	Not Called	Not Called	Not Called	Not Called	Not Called	Not Called	Not Called	Not Called	Not Called	Not Called	Not Called	Not Called	Not Called	Not Called	Not Called	Not Called	Not Called	Not Called	Not Called	Not Called	Not Called	Not Called	Not Called	Not Called	Not Called	Not Called	Not Called	Not Called	Not Called	Not Called	Lost	Lost	Not Called	Lost	Not Called	Not Called	Not Called
TCGA-S9-A6TY	TCGA-S9-A6TY-01	ODG	Diffuse Glioma	Oligodendroglioma	Oligodendroglioma	G2	No	Yes	S9	CNS	8	Lost	Not Called	Not Called	Not Called	Not Called	Not Called	Not Called	Not Called	Not Called	Not Called	Not Called	Not Called	Gained	Gained	Gained	Gained	Not Called	Not Called	Not Called	Not Called	Gained	Gained	Not Called	Not Called	Not Called	Not Called	Not Called	Not Called	Not Called	Not Called	Not Called	Not Called	Not Called	Not Called	Lost	Not Called	Not Called	Not Called
TCGA-S9-A6TZ	TCGA-S9-A6TZ-01	DIFG	Diffuse Glioma	Astrocytoma	Astrocytoma	G2	No	Yes	S9	CNS	1	Not Called	Not Called	Not Called	Not Called	Not Called	Not Called	Not Called	Not Called	Not Called	Not Called		Lost	Not Called	Not Called	Not Called	Not Called	Not Called	Not Called	Not Called	Not Called	Not Called	Not Called	Not Called	Not Called	Not Called	Not Called	Not Called	Not Called	Not Called	Not Called	Not Called	Not Called	Not Called	Not Called		Not Called	Not Called	Not Called
TCGA-S9-A6U0	TCGA-S9-A6U0-01	DIFG	Diffuse Glioma	Astrocytoma	Astrocytoma	G3	No	Yes	S9	CNS	4	Not Called	Not Called	Not Called	Not Called	Not Called	Not Called	Not Called	Not Called	Not Called	Not Called	Not Called	Not Called	Gained	Gained	Not Called	Not Called		Not Called	Lost	Lost	Not Called	Not Called	Not Called	Not Called	Not Called	Not Called	Not Called	Not Called	Not Called	Not Called	Not Called		Not Called	Not Called	Not Called	Not Called	Not Called	Not Called
TCGA-S9-A6U1	TCGA-S9-A6U1-01	DIFG	Diffuse Glioma	Astrocytoma	Astrocytoma	G3	No	Yes	S9	CNS	2	Not Called	Not Called	Not Called	Not Called	Not Called	Not Called	Not Called	Not Called	Not Called	Not Called	Not Called	Not Called	Not Called	Not Called	Not Called	Not Called	Not Called	Not Called	Not Called	Not Called	Not Called	Not Called	Not Called	Not Called	Not Called	Not Called	Not Called	Not Called	Not Called	Gained	Gained	Not Called	Not Called	Not Called	Not Called	Not Called	Not Called	Not Called
TCGA-S9-A6U2	TCGA-S9-A6U2-01	ODG	Diffuse Glioma	Oligodendroglioma	Oligodendroglioma	G2	No	Yes	S9	CNS	3	Lost	Not Called	Not Called	Not Called	Not Called	Not Called	Not Called	Not Called	Not Called	Not Called	Not Called	Not Called	Not Called	Not Called	Not Called	Not Called	Not Called	Not Called	Not Called	Not Called	Not Called	Not Called	Not Called	Not Called	Not Called	Not Called	Lost	Not Called	Not Called	Not Called	Not Called	Not Called	Not Called	Not Called	Lost	Not Called	Not Called	Not Called
TCGA-S9-A6U5	TCGA-S9-A6U5-01	DIFG	Diffuse Glioma	Astrocytoma	Astrocytoma	G2	No	Yes	S9	CNS	2	Lost	Not Called	Not Called	Not Called	Not Called	Not Called	Not Called	Not Called	Not Called	Not Called	Not Called	Not Called	Not Called	Not Called	Not Called	Not Called	Not Called	Not Called	Not Called	Not Called	Not Called	Not Called	Not Called	Not Called	Not Called	Not Called	Not Called	Not Called	Not Called	Not Called	Not Called	Not Called	Not Called	Not Called	Lost	Not Called	Not Called	Not Called
TCGA-S9-A6U6	TCGA-S9-A6U6-01	DIFG	Diffuse Glioma	Astrocytoma	Astrocytoma	G3	No	Yes	S9	CNS	1	Not Called	Not Called	Not Called	Not Called	Not Called	Not Called	Not Called	Not Called	Not Called	Not Called	Not Called		Not Called	Not Called	Not Called		Not Called	Not Called	Not Called		Not Called	Not Called	Not Called	Not Called	Not Called	Not Called	Not Called	Not Called	Not Called	Gained	Not Called	Not Called	Not Called	Not Called	Not Called	Not Called	Not Called	Not Called
TCGA-S9-A6U8	TCGA-S9-A6U8-01	DIFG	Diffuse Glioma	Astrocytoma	Astrocytoma	G2	No	Yes	S9	CNS	0	Not Called	Not Called	Not Called	Not Called	Not Called	Not Called	Not Called	Not Called	Not Called	Not Called	Not Called	Not Called	Not Called	Not Called	Not Called	Not Called	Not Called	Not Called	Not Called	Not Called	Not Called	Not Called	Not Called	Not Called	Not Called	Not Called	Not Called	Not Called	Not Called	Not Called	Not Called	Not Called	Not Called	Not Called	Not Called	Not Called	Not Called	Not Called
TCGA-S9-A6U9	TCGA-S9-A6U9-01	DIFG	Diffuse Glioma	Astrocytoma	Astrocytoma	G3	No	Yes	S9	CNS	0	Not Called	Not Called	Not Called	Not Called	Not Called	Not Called	Not Called	Not Called	Not Called	Not Called	Not Called	Not Called	Not Called	Not Called	Not Called	Not Called	Not Called	Not Called	Not Called	Not Called	Not Called	Not Called	Not Called	Not Called	Not Called	Not Called	Not Called	Not Called	Not Called	Not Called	Not Called	Not Called	Not Called	Not Called	Not Called	Not Called	Not Called	Not Called
TCGA-S9-A6UA	TCGA-S9-A6UA-01	DIFG	Diffuse Glioma	Astrocytoma	Astrocytoma	G3	No	Yes	S9	CNS	5	Not Called	Gained	Not Called	Not Called	Not Called	Not Called	Not Called	Not Called	Not Called	Not Called	Not Called	Not Called	Not Called	Not Called	Not Called	Not Called		Not Called	Lost	Not Called	Not Called	Not Called	Not Called	Gained		Not Called		Not Called	Not Called	Not Called	Gained	Lost	Not Called	Not Called	Not Called	Not Called	Not Called	Not Called
TCGA-S9-A6UB	TCGA-S9-A6UB-01	ODG	Diffuse Glioma	Oligodendroglioma	Oligodendroglioma	G2	No	Yes	S9	CNS	3	Lost	Not Called	Not Called	Not Called	Not Called	Not Called	Lost	Not Called	Not Called	Not Called	Not Called	Not Called	Not Called	Not Called	Not Called	Not Called	Not Called	Not Called	Not Called		Not Called	Not Called	Not Called	Not Called	Not Called	Not Called	Not Called	Not Called	Not Called	Not Called	Not Called	Not Called	Not Called	Not Called	Lost	Not Called	Not Called	Not Called
TCGA-S9-A6WD	TCGA-S9-A6WD-01	ODG	Diffuse Glioma	Oligodendroglioma	Oligodendroglioma	G3	No	Yes	S9	CNS	6	Lost	Not Called	Not Called	Not Called	Not Called	Not Called	Not Called	Not Called	Not Called	Not Called	Not Called	Not Called	Not Called	Not Called	Not Called	Not Called	Not Called	Not Called	Not Called	Not Called	Gained	Gained	Not Called	Not Called	Not Called			Not Called	Not Called	Not Called	Not Called	Lost	Lost		Lost	Not Called	Not Called	Not Called
TCGA-S9-A6WE	TCGA-S9-A6WE-01	ODG	Diffuse Glioma	Oligodendroglioma	Oligodendroglioma	G2	No	Yes	S9	CNS	2	Lost	Not Called	Not Called	Not Called	Not Called	Not Called	Not Called	Not Called	Not Called	Not Called	Not Called	Not Called	Not Called	Not Called	Not Called	Not Called	Not Called	Not Called	Not Called	Not Called	Not Called	Not Called	Not Called	Not Called	Not Called	Not Called	Not Called	Not Called	Not Called	Not Called	Not Called	Not Called	Not Called	Not Called	Lost	Not Called	Not Called	Not Called
TCGA-S9-A6WG	TCGA-S9-A6WG-01	DIFG	Diffuse Glioma	Astrocytoma	Astrocytoma	G3	No	Yes	S9	CNS	0	Not Called	Not Called	Not Called	Not Called		Not Called	Not Called	Not Called	Not Called	Not Called	Not Called	Not Called	Not Called	Not Called	Not Called		Not Called	Not Called	Not Called	Not Called	Not Called	Not Called	Not Called	Not Called	Not Called	Not Called	Not Called	Not Called	Not Called	Not Called		Not Called	Not Called	Not Called	Not Called	Not Called	Not Called	Not Called
TCGA-S9-A6WH	TCGA-S9-A6WH-01	OAST	Diffuse Glioma	Oligoastrocytoma	Oligoastrocytoma	G2	No	Yes	S9	CNS	10	Lost	Not Called	Not Called	Not Called	Not Called	Not Called	Not Called	Not Called	Not Called	Not Called	Not Called	Not Called	Not Called	Not Called	Not Called	Not Called	Lost	Gained	Not Called	Not Called	Gained	Gained	Not Called	Not Called	Not Called	Not Called	Not Called	Gained	Lost	Not Called	Not Called	Lost	Lost	Not Called	Lost	Not Called	Not Called	Not Called
TCGA-S9-A6WI	TCGA-S9-A6WI-01	OAST	Diffuse Glioma	Oligoastrocytoma	Oligoastrocytoma	G2	No	Yes	S9	CNS	2	Lost	Not Called	Not Called	Not Called	Not Called	Not Called	Not Called	Not Called	Not Called	Not Called	Not Called	Not Called	Not Called	Not Called	Not Called	Not Called	Not Called	Not Called	Not Called	Not Called	Not Called	Not Called	Not Called	Not Called	Not Called	Not Called	Not Called	Not Called	Not Called	Not Called	Not Called	Not Called	Not Called	Not Called	Lost	Not Called	Not Called	Not Called
TCGA-S9-A6WL	TCGA-S9-A6WL-01	DIFG	Diffuse Glioma	Astrocytoma	Astrocytoma	G3	No	Yes	S9	CNS	7	Lost	Not Called	Not Called	Not Called	Not Called	Not Called	Lost	Lost	Not Called	Not Called	Not Called	Not Called	Not Called	Not Called	Not Called	Not Called	Not Called	Not Called	Not Called	Not Called	Not Called	Not Called	Not Called	Not Called	Not Called	Not Called	Not Called	Not Called	Not Called	Not Called	Not Called	Lost	Lost	Not Called	Lost	Not Called	Not Called	Gained
TCGA-S9-A6WM	TCGA-S9-A6WM-01	DIFG	Diffuse Glioma	Astrocytoma	Astrocytoma	G3	No	Yes	S9	CNS	9	Not Called	Not Called	Not Called	Not Called	Not Called	Not Called	Not Called	Not Called	Not Called	Not Called	Not Called	Not Called	Gained	Gained	Lost	Lost	Not Called	Not Called	Lost	Lost	Lost	Lost	Not Called	Not Called	Not Called	Lost	Not Called	Not Called	Not Called	Not Called	Not Called	Not Called	Not Called	Not Called	Not Called	Not Called	Not Called	Not Called
TCGA-S9-A6WN	TCGA-S9-A6WN-01	DIFG	Diffuse Glioma	Astrocytoma	Astrocytoma	G3	No	Yes	S9	CNS	4	Lost	Not Called	Not Called	Not Called	Not Called	Not Called	Not Called	Not Called	Not Called	Not Called	Not Called	Not Called	Not Called	Not Called	Not Called	Not Called	Not Called	Not Called	Not Called	Not Called	Not Called		Not Called	Not Called	Not Called	Not Called	Not Called	Not Called	Not Called	Not Called	Not Called	Lost	Lost	Not Called	Lost	Not Called	Not Called	Not Called
TCGA-S9-A6WO	TCGA-S9-A6WO-01	DIFG	Diffuse Glioma	Astrocytoma	Astrocytoma	G2	No	Yes	S9	CNS	3	Not Called	Not Called	Not Called	Not Called		Not Called	Not Called	Not Called	Not Called	Not Called	Not Called	Not Called	Not Called		Gained	Gained	Not Called	Not Called	Not Called	Not Called	Not Called	Not Called		Not Called	Not Called	Not Called	Not Called	Not Called	Not Called	Gained	Not Called	Not Called	Not Called	Not Called	Not Called	Not Called	Not Called	Not Called
TCGA-S9-A6WP	TCGA-S9-A6WP-01	OAST	Diffuse Glioma	Oligoastrocytoma	Oligoastrocytoma	G3	No	Yes	S9	CNS	3	Lost	Not Called	Not Called	Not Called	Not Called	Not Called	Not Called	Lost	Not Called	Not Called	Not Called	Not Called	Not Called	Not Called	Not Called		Not Called	Not Called	Not Called	Not Called	Not Called	Not Called	Not Called	Not Called	Not Called		Not Called	Not Called	Not Called	Not Called	Not Called	Not Called	Not Called	Not Called	Lost	Not Called	Not Called	Not Called
TCGA-S9-A6WQ	TCGA-S9-A6WQ-01	OAST	Diffuse Glioma	Oligoastrocytoma	Oligoastrocytoma	G2	No	Yes	S9	CNS	1	Not Called	Not Called	Not Called		Not Called	Not Called	Not Called	Not Called	Not Called	Not Called	Not Called	Not Called	Not Called	Not Called	Not Called	Not Called	Not Called	Not Called	Not Called		Not Called	Not Called	Not Called	Lost	Not Called	Not Called	Not Called	Not Called	Not Called	Not Called	Not Called	Not Called	Not Called	Not Called	Not Called	Not Called	Not Called	Not Called
TCGA-S9-A7IQ	TCGA-S9-A7IQ-01	OAST	Diffuse Glioma	Oligoastrocytoma	Oligoastrocytoma	G2	No	Yes	S9	CNS	4	Lost	Not Called	Not Called	Not Called	Not Called	Not Called	Not Called	Not Called	Not Called	Not Called	Not Called	Not Called	Gained	Gained	Not Called	Not Called	Not Called	Not Called	Not Called	Not Called	Not Called	Not Called	Not Called	Not Called	Not Called	Not Called	Not Called	Not Called	Not Called	Not Called	Not Called	Not Called	Not Called	Not Called	Lost	Not Called	Not Called	Not Called
TCGA-S9-A7IS	TCGA-S9-A7IS-01	DIFG	Diffuse Glioma	Astrocytoma	Astrocytoma	G3	No	Yes	S9	CNS	2	Not Called	Not Called	Not Called	Not Called	Not Called	Not Called	Not Called	Lost	Not Called				Not Called	Not Called	Not Called	Not Called		Not Called	Gained	Not Called	Not Called	Not Called	Not Called	Not Called		Not Called	Not Called	Not Called	Not Called	Not Called	Not Called	Not Called	Not Called	Not Called	Not Called	Not Called	Not Called	Not Called
TCGA-S9-A7IX	TCGA-S9-A7IX-01	DIFG	Diffuse Glioma	Astrocytoma	Astrocytoma	G3	No	Yes	S9	CNS	10	Not Called	Not Called	Not Called	Not Called	Not Called	Not Called	Not Called	Not Called		Not Called	Not Called	Not Called	Gained	Gained	Not Called	Not Called	Lost		Lost	Lost	Not Called	Not Called	Not Called	Not Called	Lost	Lost	Not Called	Lost	Lost	Not Called	Not Called	Not Called	Not Called	Not Called	Not Called	Not Called	Not Called
TCGA-S9-A7IY	TCGA-S9-A7IY-01	OAST	Diffuse Glioma	Oligoastrocytoma	Oligoastrocytoma	G3	No	Yes	S9	CNS	2	Lost	Not Called	Not Called	Not Called	Not Called	Not Called	Not Called	Not Called	Not Called	Not Called	Not Called	Not Called	Not Called	Not Called	Not Called	Not Called	Not Called	Not Called	Not Called	Not Called	Not Called	Not Called	Not Called	Not Called	Not Called	Not Called	Not Called	Not Called	Not Called	Not Called	Not Called	Not Called	Not Called	Not Called	Lost	Not Called	Not Called	Not Called
TCGA-S9-A7IZ	TCGA-S9-A7IZ-01	DIFG	Diffuse Glioma	Astrocytoma	Astrocytoma	G3	No	Yes	S9	CNS	2	Not Called	Not Called	Not Called	Not Called	Not Called	Not Called			Not Called	Not Called	Not Called	Not Called	Gained	Gained	Not Called	Not Called		Not Called	Not Called	Not Called				Not Called	Not Called			Not Called	Not Called	Not Called	Not Called	Not Called	Not Called	Not Called	Not Called	Not Called	Not Called	Not Called
TCGA-S9-A7J0	TCGA-S9-A7J0-01	ODG	Diffuse Glioma	Oligodendroglioma	Oligodendroglioma	G3	No	Yes	S9	CNS	7	Not Called	Not Called	Not Called	Not Called		Not Called	Gained	Lost	Not Called	Not Called	Not Called	Not Called	Not Called		Not Called	Not Called		Not Called	Gained	Lost		Not Called	Gained	Not Called			Not Called	Not Called	Gained	Not Called		Not Called	Not Called	Not Called	Not Called	Not Called	Not Called	Not Called
TCGA-S9-A7J1	TCGA-S9-A7J1-01	ODG	Diffuse Glioma	Oligodendroglioma	Oligodendroglioma	G2	No	Yes	S9	CNS	2	Lost	Not Called	Not Called	Not Called	Not Called	Not Called	Not Called	Not Called	Not Called	Not Called	Not Called	Not Called	Not Called	Not Called	Not Called	Not Called	Not Called	Not Called	Not Called	Not Called	Not Called	Not Called	Not Called	Not Called	Not Called		Not Called	Not Called	Not Called	Not Called	Not Called	Not Called	Not Called	Not Called	Lost	Not Called	Not Called	Not Called
TCGA-S9-A7J2	TCGA-S9-A7J2-01	ODG	Diffuse Glioma	Oligodendroglioma	Oligodendroglioma	G3	No	Yes	S9	CNS	2	Lost	Not Called	Not Called	Not Called	Not Called	Not Called	Not Called	Not Called	Not Called	Not Called	Not Called	Not Called	Not Called	Not Called	Not Called	Not Called	Not Called	Not Called	Not Called	Not Called	Not Called	Not Called	Not Called	Not Called	Not Called	Not Called	Not Called	Not Called	Not Called	Not Called	Not Called	Not Called	Not Called	Not Called	Lost	Not Called	Not Called	Not Called
TCGA-S9-A7J3	TCGA-S9-A7J3-01	ODG	Diffuse Glioma	Oligodendroglioma	Oligodendroglioma	G3	No	Yes	S9	CNS	2	Lost	Not Called	Not Called	Not Called	Not Called	Not Called	Not Called	Not Called	Not Called	Not Called	Not Called	Not Called	Not Called	Not Called	Not Called	Not Called	Not Called	Not Called	Not Called	Not Called	Not Called	Not Called	Not Called	Not Called	Not Called	Not Called	Not Called	Not Called	Not Called	Not Called	Not Called	Not Called	Not Called	Not Called	Lost	Not Called	Not Called	Not Called
TCGA-S9-A7QW	TCGA-S9-A7QW-01	DIFG	Diffuse Glioma	Astrocytoma	Astrocytoma	G3	Yes	No	S9	CNS	2	Not Called	Not Called	Not Called	Not Called	Not Called	Not Called	Not Called	Not Called	Not Called	Not Called	Not Called	Not Called	Not Called		Not Called		Not Called	Gained	Not Called	Not Called	Not Called	Not Called	Not Called	Not Called	Not Called	Not Called	Not Called	Not Called	Gained	Not Called	Not Called	Not Called	Not Called	Not Called		Not Called	Not Called	Not Called
TCGA-S9-A7QX	TCGA-S9-A7QX-01	DIFG	Diffuse Glioma	Astrocytoma	Astrocytoma	G3	Yes	No	S9	CNS	1	Not Called	Not Called	Not Called	Not Called	Not Called	Not Called	Not Called	Not Called	Not Called	Not Called	Not Called	Not Called	Not Called	Not Called	Not Called		Not Called	Not Called	Not Called		Not Called	Not Called		Lost	Not Called		Not Called	Not Called	Not Called	Not Called	Not Called	Not Called	Not Called	Not Called	Not Called		Not Called	Not Called
TCGA-S9-A7QY	TCGA-S9-A7QY-01	OAST	Diffuse Glioma	Oligoastrocytoma	Oligoastrocytoma	G2	No	Yes	S9	CNS	5	Lost	Not Called	Not Called	Not Called	Not Called	Not Called	Not Called	Lost	Not Called	Not Called	Not Called	Not Called	Not Called		Not Called	Not Called	Not Called	Not Called	Not Called	Not Called	Not Called	Not Called	Not Called	Not Called	Not Called	Not Called	Not Called	Not Called	Not Called	Not Called	Not Called	Lost	Lost	Not Called	Lost	Not Called	Not Called	Not Called
TCGA-S9-A7QZ	TCGA-S9-A7QZ-01	ODG	Diffuse Glioma	Oligodendroglioma	Oligodendroglioma	G2	No	Yes	S9	CNS	3	Lost	Not Called	Not Called	Not Called	Not Called	Not Called	Not Called	Not Called	Not Called	Not Called	Not Called	Not Called	Not Called	Not Called	Not Called	Not Called	Not Called	Not Called	Not Called	Not Called	Not Called	Not Called	Not Called	Not Called	Not Called		Lost	Not Called	Not Called	Not Called	Not Called	Not Called	Not Called	Not Called	Lost	Not Called	Not Called	Not Called
TCGA-S9-A7R1	TCGA-S9-A7R1-01	ODG	Diffuse Glioma	Oligodendroglioma	Oligodendroglioma	G2	No	Yes	S9	CNS	6	Lost	Gained	Not Called	Not Called	Not Called	Not Called	Not Called	Not Called	Not Called	Not Called	Not Called	Not Called	Not Called		Not Called	Not Called	Lost	Lost	Not Called	Not Called	Not Called	Not Called	Not Called	Not Called	Not Called	Not Called	Not Called	Not Called	Not Called	Not Called	Not Called	Not Called	Not Called	Gained	Lost	Not Called	Not Called	Not Called
TCGA-S9-A7R2	TCGA-S9-A7R2-01	DIFG	Diffuse Glioma	Astrocytoma	Astrocytoma	G3	No	Yes	S9	CNS	5	Not Called	Not Called	Not Called	Not Called	Not Called	Not Called	Not Called	Not Called	Not Called	Not Called	Not Called	Not Called	Gained	Gained	Not Called	Not Called	Not Called	Not Called	Lost	Lost	Not Called	Not Called	Not Called	Not Called	Not Called	Lost	Not Called	Not Called	Not Called	Not Called	Not Called	Not Called	Not Called	Not Called	Not Called	Not Called	Not Called	Not Called
TCGA-S9-A7R3	TCGA-S9-A7R3-01	DIFG	Diffuse Glioma	Astrocytoma	Astrocytoma	G2	No	Yes	S9	CNS	0	Not Called	Not Called	Not Called	Not Called		Not Called	Not Called	Not Called	Not Called	Not Called	Not Called		Not Called	Not Called	Not Called	Not Called		Not Called	Not Called	Not Called	Not Called	Not Called	Not Called	Not Called	Not Called		Not Called	Not Called	Not Called	Not Called	Not Called	Not Called	Not Called	Not Called	Not Called	Not Called	Not Called	Not Called
TCGA-S9-A7R4	TCGA-S9-A7R4-01	DIFG	Diffuse Glioma	Astrocytoma	Astrocytoma	G3	No	Yes	S9	CNS	0	Not Called	Not Called	Not Called	Not Called	Not Called	Not Called	Not Called	Not Called	Not Called	Not Called	Not Called	Not Called	Not Called	Not Called	Not Called	Not Called	Not Called	Not Called	Not Called	Not Called	Not Called	Not Called	Not Called	Not Called	Not Called	Not Called	Not Called	Not Called	Not Called	Not Called	Not Called	Not Called	Not Called	Not Called	Not Called	Not Called	Not Called	Not Called
TCGA-S9-A7R7	TCGA-S9-A7R7-01	DIFG	Diffuse Glioma	Astrocytoma	Astrocytoma	G2	No	Yes	S9	CNS	3	Not Called	Not Called	Not Called	Not Called	Not Called	Not Called	Not Called	Not Called	Lost		Not Called	Not Called	Not Called	Not Called	Not Called	Not Called	Not Called	Not Called	Not Called	Not Called	Lost	Not Called		Lost	Not Called	Not Called	Not Called		Not Called	Not Called	Not Called	Not Called	Not Called	Not Called	Not Called	Not Called	Not Called	Not Called
TCGA-S9-A7R8	TCGA-S9-A7R8-01	DIFG	Diffuse Glioma	Astrocytoma	Astrocytoma	G3	No	Yes	S9	CNS	1	Not Called	Not Called	Not Called	Not Called	Not Called	Not Called	Not Called	Not Called	Not Called	Not Called	Not Called	Lost	Not Called	Not Called	Not Called	Not Called	Not Called	Not Called	Not Called	Not Called	Not Called		Not Called		Not Called		Not Called	Not Called	Not Called	Not Called	Not Called	Not Called	Not Called	Not Called		Not Called	Not Called	Not Called
TCGA-S9-A89V	TCGA-S9-A89V-01	DIFG	Diffuse Glioma	Astrocytoma	Astrocytoma	G3	No	Yes	S9	CNS	9	Not Called	Not Called	Lost		Lost	Not Called	Not Called	Not Called	Not Called	Not Called	Not Called	Not Called	Not Called	Not Called	Not Called	Not Called	Lost	Not Called	Not Called	Not Called	Not Called	Lost		Lost	Lost	Lost	Not Called	Not Called		Not Called	Not Called	Lost	Not Called	Not Called		Lost	Not Called	Not Called
TCGA-S9-A89Z	TCGA-S9-A89Z-01	DIFG	Diffuse Glioma	Astrocytoma	Astrocytoma	G3	Yes	No	S9	CNS	7	Not Called	Not Called	Not Called	Not Called	Not Called	Not Called	Not Called	Not Called	Not Called		Not Called	Not Called	Not Called	Not Called	Gained	Not Called	Not Called	Not Called			Lost	Not Called	Not Called	Not Called	Lost	Not Called	Not Called	Not Called	Lost	Not Called	Not Called	Gained	Gained	Not Called	Not Called	Not Called	Not Called	Lost
TCGA-TM-A7C3	TCGA-TM-A7C3-01	DIFG	Diffuse Glioma	Astrocytoma	Astrocytoma	G3	No	Yes	TM	CNS	6	Not Called	Not Called	Not Called	Not Called	Not Called	Not Called	Not Called	Not Called	Not Called	Not Called	Not Called	Not Called	Gained	Gained	Not Called	Not Called	Not Called	Not Called	Lost	Lost	Not Called	Not Called	Not Called	Not Called	Not Called	Not Called	Not Called	Not Called	Not Called	Not Called	Not Called	Not Called	Not Called	Gained	Gained	Not Called	Not Called	Not Called
TCGA-TM-A7C4	TCGA-TM-A7C4-01	DIFG	Diffuse Glioma	Astrocytoma	Astrocytoma	G2	No	Yes	TM	CNS	1	Not Called	Not Called	Not Called	Not Called	Not Called	Not Called	Not Called	Lost	Not Called	Not Called	Not Called	Not Called	Not Called		Not Called	Not Called		Not Called	Not Called	Not Called		Not Called	Not Called	Not Called	Not Called	Not Called	Not Called	Not Called	Not Called	Not Called	Not Called	Not Called	Not Called	Not Called	Not Called	Not Called	Not Called	Not Called
TCGA-TM-A7C5	TCGA-TM-A7C5-01	OAST	Diffuse Glioma	Oligoastrocytoma	Oligoastrocytoma	G2	No	Yes	TM	CNS	5	Lost	Not Called	Not Called	Not Called	Not Called	Not Called	Lost	Lost	Not Called	Not Called	Not Called	Not Called	Not Called	Not Called	Not Called	Not Called	Not Called	Not Called	Not Called	Not Called	Not Called	Not Called	Not Called	Not Called	Not Called	Not Called	Lost	Not Called	Not Called	Not Called	Not Called	Not Called	Not Called	Not Called	Lost	Not Called	Not Called	Not Called
TCGA-TM-A7CA	TCGA-TM-A7CA-01	DIFG	Diffuse Glioma	Astrocytoma	Astrocytoma	G2	No	Yes	TM	CNS	1	Not Called	Not Called	Not Called	Not Called	Not Called	Not Called	Not Called		Not Called	Not Called	Not Called	Not Called	Not Called		Not Called	Not Called	Not Called	Not Called	Gained	Not Called	Not Called	Not Called	Not Called	Not Called	Not Called	Not Called	Not Called	Not Called	Not Called	Not Called	Not Called	Not Called	Not Called	Not Called	Not Called	Not Called	Not Called	Not Called
TCGA-TM-A7CF	TCGA-TM-A7CF-01	DIFG	Diffuse Glioma	Astrocytoma	Astrocytoma	G2	No	Yes	TM	CNS	2	Not Called	Not Called	Not Called	Not Called	Not Called	Not Called	Not Called		Not Called	Not Called	Lost	Lost	Not Called	Not Called	Not Called		Not Called	Not Called	Not Called	Not Called	Not Called	Not Called	Not Called	Not Called	Not Called	Not Called	Not Called	Not Called	Not Called	Not Called	Not Called	Not Called	Not Called			Not Called	Not Called	Not Called
TCGA-TM-A84B	TCGA-TM-A84B-01	DIFG	Diffuse Glioma	Astrocytoma	Astrocytoma	G3	No	Yes	TM	CNS	6	Not Called	Gained	Not Called	Not Called	Not Called	Lost	Not Called	Not Called	Not Called	Not Called	Not Called	Not Called	Gained	Gained	Not Called	Not Called	Not Called	Not Called	Lost	Lost	Not Called	Not Called	Not Called	Not Called	Not Called	Not Called		Not Called	Not Called	Not Called	Not Called	Not Called	Not Called			Not Called	Not Called	Not Called
TCGA-TM-A84C	TCGA-TM-A84C-01	DIFG	Diffuse Glioma	Astrocytoma	Astrocytoma	G2	No	Yes	TM	CNS	0	Not Called	Not Called	Not Called	Not Called	Not Called	Not Called	Not Called	Not Called	Not Called	Not Called	Not Called	Not Called	Not Called	Not Called	Not Called	Not Called	Not Called	Not Called	Not Called	Not Called	Not Called	Not Called	Not Called	Not Called	Not Called	Not Called	Not Called	Not Called	Not Called	Not Called	Not Called	Not Called	Not Called	Not Called	Not Called	Not Called	Not Called	Not Called
TCGA-TM-A84F	TCGA-TM-A84F-01	DIFG	Diffuse Glioma	Astrocytoma	Astrocytoma	G3	No	Yes	TM	CNS	1	Not Called	Not Called	Not Called	Not Called	Not Called	Not Called	Not Called	Not Called	Not Called	Not Called		Not Called	Not Called	Not Called	Not Called	Not Called	Not Called	Not Called	Not Called	Not Called	Not Called	Not Called	Not Called	Not Called	Lost	Not Called	Not Called	Not Called	Not Called	Not Called		Not Called	Not Called	Not Called	Not Called	Not Called	Not Called	Not Called
TCGA-TM-A84G	TCGA-TM-A84G-01	ODG	Diffuse Glioma	Oligodendroglioma	Oligodendroglioma	G3	No	Yes	TM	CNS	2	Lost	Not Called	Not Called	Not Called	Not Called	Not Called	Not Called	Not Called	Not Called	Not Called	Not Called	Not Called	Not Called	Not Called	Not Called	Not Called	Not Called	Not Called	Not Called	Not Called	Not Called	Not Called			Not Called	Not Called	Not Called	Not Called	Not Called	Not Called	Not Called	Not Called	Not Called	Not Called	Lost	Not Called	Not Called	Not Called
TCGA-TM-A84H	TCGA-TM-A84H-01	OAST	Diffuse Glioma	Oligoastrocytoma	Oligoastrocytoma	G3	No	Yes	TM	CNS	4	Not Called	Not Called	Not Called	Not Called		Not Called	Not Called	Not Called	Not Called	Not Called	Not Called	Not Called	Gained	Gained	Not Called				Gained	Not Called	Not Called	Not Called	Not Called	Not Called	Not Called	Not Called	Not Called	Not Called	Not Called	Not Called		Not Called	Not Called	Not Called	Not Called	Not Called		Gained
TCGA-TM-A84I	TCGA-TM-A84I-01	DIFG	Diffuse Glioma	Astrocytoma	Astrocytoma	G3	No	Yes	TM	CNS	11	Gained	Gained	Not Called		Not Called	Not Called	Not Called	Not Called		Lost	Not Called	Not Called	Not Called	Not Called	Not Called	Not Called	Not Called	Not Called	Lost	Lost	Lost		Gained	Lost	Not Called	Lost	Not Called		Gained	Not Called	Not Called		Lost	Not Called	Not Called	Not Called	Not Called	Not Called
TCGA-TM-A84J	TCGA-TM-A84J-01	ODG	Diffuse Glioma	Oligodendroglioma	Oligodendroglioma	G3	No	Yes	TM	CNS	7	Not Called	Not Called	Not Called	Not Called	Not Called	Not Called	Not Called	Not Called	Not Called	Not Called	Not Called	Not Called	Not Called	Not Called	Not Called	Not Called	Lost	Lost	Lost	Lost	Lost	Gained	Not Called	Not Called	Not Called	Not Called	Not Called	Not Called	Not Called	Not Called	Not Called	Not Called	Not Called	Not Called	Not Called	Not Called	Not Called	Not Called
TCGA-TM-A84L	TCGA-TM-A84L-01	OAST	Diffuse Glioma	Oligoastrocytoma	Oligoastrocytoma	G2	No	Yes	TM	CNS	0	Not Called	Not Called	Not Called	Not Called	Not Called	Not Called	Not Called	Not Called	Not Called	Not Called	Not Called	Not Called	Not Called	Not Called	Not Called	Not Called	Not Called	Not Called	Not Called	Not Called	Not Called	Not Called	Not Called	Not Called		Not Called	Not Called	Not Called	Not Called	Not Called	Not Called	Not Called	Not Called	Not Called	Not Called	Not Called	Not Called	Not Called
TCGA-TM-A84M	TCGA-TM-A84M-01	ODG	Diffuse Glioma	Oligodendroglioma	Oligodendroglioma	G3	No	Yes	TM	CNS	2	Lost	Not Called	Not Called	Not Called	Not Called	Not Called	Not Called	Not Called	Not Called	Not Called	Not Called	Not Called	Not Called	Not Called	Not Called	Not Called	Not Called	Not Called	Not Called	Not Called	Not Called	Not Called	Not Called	Not Called	Not Called	Not Called	Not Called	Not Called	Not Called	Not Called		Not Called	Not Called	Not Called	Lost	Not Called	Not Called	Not Called
TCGA-TM-A84O	TCGA-TM-A84O-01	ODG	Diffuse Glioma	Oligodendroglioma	Oligodendroglioma	G3	No	Yes	TM	CNS	2	Lost	Not Called	Not Called	Not Called	Not Called	Not Called	Not Called	Not Called	Not Called	Not Called	Not Called	Not Called	Not Called	Not Called	Not Called	Not Called	Not Called	Not Called	Not Called	Not Called	Not Called	Not Called	Not Called	Not Called	Not Called	Not Called	Not Called	Not Called	Not Called	Not Called	Not Called	Not Called	Not Called	Not Called	Lost	Not Called	Not Called	Not Called
TCGA-TM-A84Q	TCGA-TM-A84Q-01	DIFG	Diffuse Glioma	Astrocytoma	Astrocytoma	G2	No	Yes	TM	CNS	2	Not Called	Not Called		Not Called	Not Called	Not Called	Not Called	Not Called	Not Called	Not Called	Not Called	Lost	Not Called	Not Called	Not Called			Not Called	Not Called	Not Called	Not Called	Not Called	Not Called	Not Called	Not Called	Not Called	Not Called	Not Called	Gained	Not Called	Not Called	Not Called	Not Called	Not Called		Not Called		Not Called
TCGA-TM-A84R	TCGA-TM-A84R-01	ODG	Diffuse Glioma	Oligodendroglioma	Oligodendroglioma	G2	No	Yes	TM	CNS	2	Lost	Not Called	Not Called	Not Called	Not Called	Not Called	Not Called	Not Called	Not Called	Not Called	Not Called	Not Called	Not Called	Not Called	Not Called	Not Called	Not Called	Not Called	Not Called	Not Called	Not Called	Not Called	Not Called	Not Called	Not Called	Not Called	Not Called	Not Called	Not Called	Not Called	Not Called	Not Called	Not Called	Not Called	Lost	Not Called	Not Called	Not Called
TCGA-TM-A84S	TCGA-TM-A84S-01	ODG	Diffuse Glioma	Oligodendroglioma	Oligodendroglioma	G3	No	Yes	TM	CNS	3	Lost	Not Called	Not Called	Not Called	Not Called	Not Called	Not Called	Not Called	Not Called	Not Called	Not Called	Not Called	Not Called	Not Called	Not Called	Not Called	Not Called	Not Called	Not Called	Not Called	Not Called	Not Called	Not Called	Not Called	Lost	Not Called	Not Called	Not Called	Not Called	Not Called	Not Called	Not Called	Not Called	Not Called	Lost	Not Called	Not Called	Not Called
TCGA-TM-A84T	TCGA-TM-A84T-01	OAST	Diffuse Glioma	Oligoastrocytoma	Oligoastrocytoma	G2	No	Yes	TM	CNS	0	Not Called	Not Called	Not Called	Not Called	Not Called	Not Called	Not Called	Not Called	Not Called	Not Called	Not Called	Not Called	Not Called	Not Called	Not Called		Not Called		Not Called	Not Called	Not Called	Not Called	Not Called	Not Called		Not Called	Not Called	Not Called	Not Called	Not Called	Not Called	Not Called	Not Called	Not Called	Not Called	Not Called	Not Called	Not Called
TCGA-TQ-A7RF	TCGA-TQ-A7RF-01	ODG	Diffuse Glioma	Oligodendroglioma	Oligodendroglioma	G3	No	Yes	TQ	CNS	1	Not Called	Not Called	Not Called	Not Called	Not Called	Not Called	Not Called	Not Called	Not Called	Not Called		Lost	Not Called	Not Called	Not Called	Not Called	Not Called	Not Called	Not Called		Not Called	Not Called		Not Called	Not Called		Not Called	Not Called	Not Called	Not Called	Not Called	Not Called	Not Called	Not Called		Not Called	Not Called	Not Called
TCGA-TQ-A7RG	TCGA-TQ-A7RG-01	OAST	Diffuse Glioma	Oligoastrocytoma	Oligoastrocytoma	G2	No	Yes	TQ	CNS	2	Lost	Not Called	Not Called	Not Called	Not Called	Not Called	Not Called	Not Called	Not Called	Not Called	Not Called	Not Called	Not Called	Not Called	Not Called	Not Called	Not Called	Not Called	Not Called	Not Called	Not Called	Not Called	Not Called	Not Called	Not Called	Not Called	Not Called	Not Called	Not Called	Not Called	Not Called	Not Called	Not Called	Not Called	Lost	Not Called	Not Called	Not Called
TCGA-TQ-A7RH	TCGA-TQ-A7RH-01	OAST	Diffuse Glioma	Oligoastrocytoma	Oligoastrocytoma	G2	No	Yes	TQ	CNS	6	Not Called	Not Called	Not Called		Lost	Not Called	Not Called	Not Called		Not Called	Not Called	Not Called		Gained	Gained	Gained	Not Called	Not Called	Not Called	Not Called		Not Called	Not Called	Not Called	Lost	Not Called	Not Called	Not Called		Not Called	Not Called	Not Called		Not Called	Lost	Not Called	Not Called	Not Called
TCGA-TQ-A7RI	TCGA-TQ-A7RI-01	ODG	Diffuse Glioma	Oligodendroglioma	Oligodendroglioma	G2	No	Yes	TQ	CNS	5	Lost	Not Called	Not Called	Not Called	Not Called	Not Called	Not Called	Not Called	Not Called	Not Called	Not Called	Not Called	Gained	Gained	Not Called	Not Called	Not Called	Not Called	Not Called	Not Called	Not Called	Not Called	Not Called	Not Called	Not Called	Not Called	Not Called	Not Called	Not Called		Not Called	Not Called	Lost	Not Called	Lost	Not Called	Not Called	Not Called
TCGA-TQ-A7RJ	TCGA-TQ-A7RJ-01	OAST	Diffuse Glioma	Oligoastrocytoma	Oligoastrocytoma	G2	No	Yes	TQ	CNS	0	Not Called	Not Called	Not Called	Not Called	Not Called	Not Called	Not Called	Not Called	Not Called	Not Called	Not Called	Not Called	Not Called	Not Called	Not Called	Not Called		Not Called	Not Called	Not Called		Not Called	Not Called	Not Called	Not Called	Not Called	Not Called	Not Called	Not Called	Not Called		Not Called	Not Called	Not Called	Not Called		Not Called	Not Called
TCGA-TQ-A7RK	TCGA-TQ-A7RK-01	OAST	Diffuse Glioma	Oligoastrocytoma	Oligoastrocytoma	G2	No	Yes	TQ	CNS	1	Not Called	Not Called	Not Called	Not Called		Not Called	Not Called		Not Called	Not Called	Not Called	Not Called	Not Called	Not Called	Not Called	Not Called	Not Called	Not Called	Not Called	Not Called	Not Called	Not Called		Not Called	Not Called	Not Called	Not Called	Not Called	Not Called	Not Called	Gained	Not Called	Not Called	Not Called	Not Called	Not Called	Not Called	Not Called
TCGA-TQ-A7RM	TCGA-TQ-A7RM-01	OAST	Diffuse Glioma	Oligoastrocytoma	Oligoastrocytoma	G3	No	Yes	TQ	CNS	9	Not Called	Not Called	Not Called		Not Called	Not Called	Not Called	Lost	Not Called		Not Called	Not Called	Gained		Not Called	Gained	Gained	Gained	Lost	Lost		Not Called	Not Called	Not Called		Not Called	Not Called	Not Called	Lost	Not Called		Not Called	Not Called	Not Called		Lost	Not Called	Not Called
TCGA-TQ-A7RN	TCGA-TQ-A7RN-01	ODG	Diffuse Glioma	Oligodendroglioma	Oligodendroglioma	G2	No	Yes	TQ	CNS	2	Lost	Not Called	Not Called	Not Called	Not Called	Not Called	Not Called	Not Called	Not Called	Not Called	Not Called	Not Called	Not Called	Not Called	Not Called	Not Called	Not Called	Not Called	Not Called	Not Called	Not Called	Not Called	Not Called	Not Called	Not Called	Not Called	Not Called	Not Called	Not Called	Not Called	Not Called	Not Called	Not Called	Not Called	Lost	Not Called	Not Called	Not Called
TCGA-TQ-A7RO	TCGA-TQ-A7RO-01	OAST	Diffuse Glioma	Oligoastrocytoma	Oligoastrocytoma	G2	No	Yes	TQ	CNS	4	Lost	Not Called	Not Called	Not Called	Not Called	Not Called		Lost	Not Called	Not Called	Not Called	Not Called	Not Called	Not Called	Not Called	Not Called	Not Called	Not Called	Not Called	Not Called	Not Called	Not Called	Not Called	Not Called	Not Called	Not Called	Lost	Not Called	Not Called	Not Called	Not Called	Not Called	Not Called	Not Called	Lost	Not Called	Not Called	Not Called
TCGA-TQ-A7RP	TCGA-TQ-A7RP-01	OAST	Diffuse Glioma	Oligoastrocytoma	Oligoastrocytoma	G2	No	Yes	TQ	CNS	8	Not Called	Not Called	Not Called	Not Called	Not Called	Not Called	Not Called	Not Called	Not Called	Not Called	Not Called	Not Called	Gained	Gained	Not Called	Not Called	Lost	Lost	Lost	Lost	Not Called	Not Called	Not Called	Not Called	Not Called	Not Called	Not Called	Not Called	Not Called	Not Called	Not Called	Not Called	Not Called	Gained	Gained	Not Called	Not Called	Not Called
TCGA-TQ-A7RQ	TCGA-TQ-A7RQ-01	ODG	Diffuse Glioma	Oligodendroglioma	Oligodendroglioma	G2	No	Yes	TQ	CNS	4	Lost	Not Called	Not Called	Not Called	Not Called	Not Called	Not Called	Not Called	Not Called	Not Called	Not Called	Not Called	Not Called	Not Called	Gained	Gained	Not Called	Not Called	Not Called	Not Called	Not Called	Not Called	Not Called	Not Called	Not Called	Not Called	Not Called	Not Called	Not Called	Not Called	Not Called	Not Called	Not Called	Not Called	Lost	Not Called	Not Called	Not Called
TCGA-TQ-A7RR	TCGA-TQ-A7RR-01	OAST	Diffuse Glioma	Oligoastrocytoma	Oligoastrocytoma	G2	No	Yes	TQ	CNS	6	Not Called	Not Called	Not Called	Not Called	Not Called	Not Called	Not Called	Lost	Not Called	Not Called	Not Called	Not Called	Not Called	Not Called		Gained	Not Called		Not Called		Lost	Not Called	Gained	Lost	Not Called	Lost	Not Called	Not Called	Not Called	Not Called	Not Called	Not Called	Not Called		Not Called	Not Called	Not Called	Not Called
TCGA-TQ-A7RS	TCGA-TQ-A7RS-01	ODG	Diffuse Glioma	Oligodendroglioma	Oligodendroglioma	G2	No	Yes	TQ	CNS	2	Lost	Not Called	Not Called	Not Called	Not Called	Not Called	Not Called	Not Called	Not Called	Not Called	Not Called	Not Called	Not Called	Not Called	Not Called	Not Called	Not Called	Not Called	Not Called	Not Called	Not Called	Not Called	Not Called	Not Called	Not Called	Not Called	Not Called	Not Called	Not Called	Not Called	Not Called	Not Called	Not Called	Not Called	Lost	Not Called	Not Called	Not Called
TCGA-TQ-A7RU	TCGA-TQ-A7RU-01	ODG	Diffuse Glioma	Oligodendroglioma	Oligodendroglioma	G2	No	Yes	TQ	CNS	2	Lost	Not Called	Not Called	Not Called	Not Called	Not Called	Not Called	Not Called	Not Called	Not Called	Not Called	Not Called	Not Called	Not Called	Not Called	Not Called	Not Called	Not Called	Not Called	Not Called	Not Called	Not Called	Not Called	Not Called	Not Called	Not Called	Not Called	Not Called	Not Called	Not Called	Not Called	Not Called	Not Called	Not Called	Lost	Not Called	Not Called	Not Called
TCGA-TQ-A7RV	TCGA-TQ-A7RV-01	DIFG	Diffuse Glioma	Astrocytoma	Astrocytoma	G2	No	Yes	TQ	CNS	1	Not Called	Not Called	Not Called	Not Called	Not Called	Not Called	Not Called	Not Called	Not Called	Not Called	Not Called	Not Called	Not Called	Not Called	Not Called			Not Called		Not Called	Not Called		Not Called	Not Called	Not Called	Not Called	Not Called	Not Called	Not Called	Gained	Not Called	Not Called	Not Called	Not Called	Not Called	Not Called	Not Called	Not Called
TCGA-TQ-A7RW	TCGA-TQ-A7RW-01	ODG	Diffuse Glioma	Oligodendroglioma	Oligodendroglioma	G2	No	Yes	TQ	CNS	4	Not Called		Not Called	Not Called		Not Called	Lost	Not Called	Not Called	Not Called	Not Called		Not Called	Not Called	Not Called	Gained	Lost	Not Called	Not Called	Not Called	Not Called	Not Called	Not Called	Not Called		Not Called	Not Called	Not Called	Not Called	Not Called	Not Called	Not Called	Not Called	Not Called	Lost	Not Called	Not Called	Not Called
TCGA-TQ-A8XE	TCGA-TQ-A8XE-01	ODG	Diffuse Glioma	Oligodendroglioma	Oligodendroglioma	G2	No	No	TQ	CNS	2	Not Called	Not Called	Not Called	Not Called	Not Called	Not Called	Not Called	Not Called	Not Called	Not Called	Not Called			Not Called	Not Called	Not Called	Lost	Not Called	Not Called	Not Called	Not Called	Not Called	Not Called	Not Called	Not Called		Not Called	Not Called	Not Called	Not Called	Not Called	Not Called	Not Called	Not Called	Lost	Not Called	Not Called	Not Called
TCGA-VM-A8C8	TCGA-VM-A8C8-01	ODG	Diffuse Glioma	Oligodendroglioma	Oligodendroglioma	G2	No	Yes	VM	CNS	10	Not Called	Not Called	Lost	Not Called	Lost	Lost	Not Called	Not Called	Not Called	Not Called	Lost	Lost	Not Called	Not Called	Not Called			Not Called	Gained	Not Called	Not Called	Gained	Not Called	Lost	Not Called		Not Called	Not Called	Not Called	Gained	Not Called	Not Called	Not Called	Not Called	Lost	Not Called	Not Called	Not Called
TCGA-VM-A8C9	TCGA-VM-A8C9-01	DIFG	Diffuse Glioma	Astrocytoma	Astrocytoma	G2	No	Yes	VM	CNS	2	Not Called	Not Called	Not Called	Not Called	Not Called	Not Called	Not Called	Not Called	Gained	Gained	Not Called	Not Called	Not Called	Not Called	Not Called	Not Called	Not Called	Not Called	Not Called	Not Called	Not Called	Not Called	Not Called	Not Called	Not Called	Not Called	Not Called	Not Called	Not Called	Not Called	Not Called	Not Called	Not Called	Not Called	Not Called	Not Called	Not Called	Not Called
TCGA-VM-A8CA	TCGA-VM-A8CA-01	ODG	Diffuse Glioma	Oligodendroglioma	Oligodendroglioma	G2	No	Yes	VM	CNS	19	Lost	Gained	Gained	Gained	Not Called	Not Called	Not Called	Not Called	Not Called	Not Called	Not Called	Not Called	Not Called	Not Called	Gained	Gained	Not Called	Not Called	Not Called	Not Called	Gained	Gained	Not Called	Not Called		Not Called	Not Called	Gained	Gained	Gained	Gained	Lost	Lost	Gained	Lost	Gained	Gained	Not Called
TCGA-VM-A8CB	TCGA-VM-A8CB-01	ODG	Diffuse Glioma	Oligodendroglioma	Oligodendroglioma	G3	No	Yes	VM	CNS	4	Lost	Not Called	Not Called	Not Called	Not Called	Not Called	Not Called	Not Called	Not Called	Not Called	Not Called	Not Called	Not Called	Not Called	Not Called	Not Called	Not Called	Not Called	Not Called	Not Called	Not Called	Not Called	Not Called		Not Called	Lost	Not Called	Not Called	Not Called	Not Called	Not Called	Not Called	Not Called	Not Called	Lost	Not Called	Not Called	Not Called
TCGA-VM-A8CD	TCGA-VM-A8CD-01	DIFG	Diffuse Glioma	Astrocytoma	Astrocytoma	G3	No	Yes	VM	CNS	8	Not Called	Not Called	Not Called	Not Called	Not Called	Not Called	Not Called	Not Called	Not Called	Not Called	Lost	Lost	Not Called	Not Called	Not Called	Not Called	Lost	Not Called	Lost	Lost	Not Called	Not Called	Not Called	Not Called	Lost	Lost	Not Called	Not Called	Not Called	Not Called		Not Called	Not Called	Not Called	Not Called	Not Called	Not Called	Not Called
TCGA-VM-A8CE	TCGA-VM-A8CE-01	ODG	Diffuse Glioma	Oligodendroglioma	Oligodendroglioma	G2	No	Yes	VM	CNS	2	Lost	Not Called	Not Called	Not Called	Not Called	Not Called	Not Called	Not Called	Not Called	Not Called	Not Called	Not Called	Not Called	Not Called	Not Called	Not Called	Not Called	Not Called	Not Called	Not Called	Not Called	Not Called	Not Called	Not Called	Not Called	Not Called	Not Called	Not Called	Not Called	Not Called	Not Called	Not Called	Not Called	Not Called	Lost	Not Called	Not Called	Not Called
TCGA-VM-A8CF	TCGA-VM-A8CF-01	DIFG	Diffuse Glioma	Astrocytoma	Astrocytoma	G3	No	Yes	VM	CNS	10	Not Called	Gained	Not Called	Not Called	Not Called	Not Called	Not Called	Not Called	Not Called		Not Called	Lost	Not Called	Not Called	Gained	Gained		Not Called	Not Called	Not Called	Lost	Gained	Not Called	Not Called	Lost	Lost		Not Called	Not Called	Not Called	Not Called	Not Called	Not Called	Not Called	Not Called	Not Called	Not Called	Lost
TCGA-VM-A8CH	TCGA-VM-A8CH-01	DIFG	Diffuse Glioma	Astrocytoma	Astrocytoma	G2	No	Yes	VM	CNS	1	Not Called	Not Called	Not Called	Not Called	Not Called	Not Called	Not Called	Not Called	Not Called	Not Called	Not Called	Not Called	Not Called	Not Called	Not Called	Not Called	Not Called	Not Called	Not Called	Not Called	Not Called	Not Called	Not Called	Not Called	Not Called	Not Called	Not Called	Not Called	Not Called	Not Called	Gained	Not Called	Not Called	Not Called	Not Called	Not Called	Not Called	Not Called
TCGA-VV-A829	TCGA-VV-A829-01	OAST	Diffuse Glioma	Oligoastrocytoma	Oligoastrocytoma	G3	No	Yes	VV	CNS	5	Lost	Not Called	Not Called	Not Called	Lost	Not Called	Not Called	Not Called	Not Called	Not Called	Not Called	Not Called	Not Called	Not Called	Not Called	Not Called	Not Called	Not Called	Not Called	Not Called	Not Called	Not Called	Not Called	Not Called	Not Called	Lost	Not Called	Not Called	Not Called	Not Called	Not Called	Not Called	Not Called	Not Called	Lost	Not Called	Not Called	Not Called
TCGA-VV-A86M	TCGA-VV-A86M-01	DIFG	Diffuse Glioma	Astrocytoma	Astrocytoma	G3	No	Yes	VV	CNS	0	Not Called	Not Called	Not Called	Not Called	Not Called	Not Called	Not Called	Not Called	Not Called	Not Called	Not Called		Not Called	Not Called	Not Called	Not Called		Not Called	Not Called	Not Called	Not Called	Not Called	Not Called	Not Called	Not Called		Not Called	Not Called	Not Called	Not Called	Not Called		Not Called	Not Called	Not Called	Not Called	Not Called	Not Called
TCGA-VW-A7QS	TCGA-VW-A7QS-01	ODG	Diffuse Glioma	Oligodendroglioma	Oligodendroglioma	G3	No	Yes	VW	CNS	2	Lost	Not Called	Not Called	Not Called	Not Called	Not Called	Not Called	Not Called	Not Called	Not Called	Not Called	Not Called	Not Called		Not Called	Not Called	Not Called	Not Called	Not Called	Not Called	Not Called	Not Called	Not Called	Not Called	Not Called		Not Called	Not Called	Not Called	Not Called	Not Called	Not Called	Not Called	Not Called	Lost	Not Called	Not Called	Not Called
TCGA-VW-A8FI	TCGA-VW-A8FI-01	DIFG	Diffuse Glioma	Astrocytoma	Astrocytoma	G3	Yes	No	VW	CNS	4	Not Called	Not Called	Not Called	Not Called	Not Called	Not Called	Not Called	Not Called	Not Called	Not Called	Not Called	Not Called	Gained	Gained	Not Called	Not Called	Not Called	Not Called	Lost	Lost	Not Called	Not Called	Not Called	Not Called	Not Called	Not Called	Not Called	Not Called	Not Called	Not Called	Not Called	Not Called	Not Called	Not Called	Not Called	Not Called	Not Called	Not Called
TCGA-W9-A837	TCGA-W9-A837-01	ODG	Diffuse Glioma	Oligodendroglioma	Oligodendroglioma	G2	No	Yes	W9	CNS	2	Lost	Not Called	Not Called	Not Called	Not Called	Not Called	Not Called	Not Called	Not Called	Not Called	Not Called	Not Called	Not Called	Not Called	Not Called	Not Called	Not Called	Not Called	Not Called	Not Called	Not Called	Not Called	Not Called	Not Called	Not Called	Not Called	Not Called	Not Called	Not Called	Not Called	Not Called	Not Called	Not Called	Not Called	Lost	Not Called	Not Called	Not Called
TCGA-WH-A86K	TCGA-WH-A86K-01	DIFG	Diffuse Glioma	Astrocytoma	Astrocytoma	G2	No	Yes	WH	CNS	1	Not Called	Not Called	Not Called	Not Called	Not Called	Not Called	Not Called	Not Called	Not Called	Not Called	Not Called	Not Called	Not Called	Not Called	Not Called	Not Called	Not Called	Not Called	Gained	Not Called		Not Called	Not Called	Not Called	Not Called	Not Called	Not Called	Not Called	Not Called	Not Called	Not Called	Not Called	Not Called	Not Called	Not Called	Not Called	Not Called	Not Called
TCGA-WY-A858	TCGA-WY-A858-01	DIFG	Diffuse Glioma	Astrocytoma	Astrocytoma	G3	No	Yes	WY	CNS	2	Not Called	Not Called	Not Called	Not Called	Not Called	Not Called	Not Called	Not Called	Not Called	Not Called	Not Called	Not Called	Not Called	Not Called	Not Called	Not Called		Not Called	Gained	Not Called	Not Called	Not Called	Not Called	Not Called	Not Called	Lost	Not Called	Not Called	Not Called	Not Called	Not Called	Not Called	Not Called	Not Called	Not Called	Not Called	Not Called	Not Called
TCGA-WY-A859	TCGA-WY-A859-01	DIFG	Diffuse Glioma	Astrocytoma	Astrocytoma	G2	No	Yes	WY	CNS	2	Not Called	Not Called	Not Called	Not Called	Not Called	Not Called	Not Called	Lost			Not Called	Not Called	Not Called	Not Called	Not Called	Not Called		Not Called		Not Called	Lost	Not Called	Not Called		Not Called	Not Called	Not Called	Not Called	Not Called	Not Called	Not Called	Not Called	Not Called	Not Called	Not Called	Not Called	Not Called	Not Called
TCGA-WY-A85A	TCGA-WY-A85A-01	DIFG	Diffuse Glioma	Astrocytoma	Astrocytoma	G2	No	Yes	WY	CNS	1	Not Called	Not Called	Not Called	Not Called	Not Called	Not Called	Not Called	Not Called	Not Called	Not Called	Not Called	Not Called	Not Called	Not Called	Not Called	Not Called	Not Called	Not Called	Gained	Not Called	Not Called	Not Called	Not Called	Not Called	Not Called	Not Called	Not Called	Not Called	Not Called	Not Called	Not Called	Not Called	Not Called	Not Called	Not Called	Not Called	Not Called	Not Called
TCGA-WY-A85B	TCGA-WY-A85B-01	DIFG	Diffuse Glioma	Astrocytoma	Astrocytoma	G2	No	Yes	WY	CNS	0	Not Called	Not Called	Not Called	Not Called	Not Called	Not Called	Not Called	Not Called	Not Called	Not Called	Not Called	Not Called	Not Called	Not Called	Not Called	Not Called	Not Called	Not Called	Not Called	Not Called	Not Called	Not Called	Not Called	Not Called	Not Called	Not Called	Not Called	Not Called	Not Called	Not Called	Not Called	Not Called	Not Called	Not Called	Not Called	Not Called	Not Called	Not Called
TCGA-WY-A85C	TCGA-WY-A85C-01	DIFG	Diffuse Glioma	Astrocytoma	Astrocytoma	G2	No	Yes	WY	CNS	0	Not Called	Not Called	Not Called	Not Called	Not Called		Not Called	Not Called	Not Called	Not Called	Not Called	Not Called	Not Called	Not Called	Not Called	Not Called	Not Called	Not Called	Not Called	Not Called			Not Called	Not Called	Not Called	Not Called		Not Called	Not Called	Not Called	Not Called	Not Called	Not Called	Not Called	Not Called	Not Called	Not Called	Not Called
TCGA-WY-A85D	TCGA-WY-A85D-01	OAST	Diffuse Glioma	Oligoastrocytoma	Oligoastrocytoma	G2	No	Yes	WY	CNS	0	Not Called	Not Called	Not Called	Not Called	Not Called	Not Called	Not Called	Not Called	Not Called		Not Called	Not Called	Not Called	Not Called	Not Called	Not Called	Not Called	Not Called	Not Called		Not Called	Not Called	Not Called		Not Called	Not Called		Not Called	Not Called	Not Called	Not Called	Not Called	Not Called	Not Called	Not Called	Not Called	Not Called	Not Called
TCGA-WY-A85E	TCGA-WY-A85E-01	OAST	Diffuse Glioma	Oligoastrocytoma	Oligoastrocytoma	G2	No	Yes	WY	CNS	5	Not Called	Not Called	Not Called	Not Called			Not Called	Not Called	Not Called	Not Called	Not Called	Not Called	Gained	Gained	Not Called	Not Called	Not Called	Gained	Gained	Not Called				Not Called		Not Called		Not Called	Not Called	Not Called	Not Called	Gained	Not Called	Not Called	Not Called	Not Called	Not Called	Not Called
TCGA-R8-A6YH	TCGA-R8-A6YH-01	LGGNOS	Encapsulated Glioma	Low-Grade Glioma (NOS)	Low-Grade Glioma	NA	NA	NA	R8	NA	1	Not Called	Not Called	Not Called	Not Called	Not Called	Not Called	Not Called	Not Called	Not Called	Not Called	Not Called		Not Called	Not Called	Not Called	Not Called	Lost	Not Called	Not Called	Not Called	Not Called	Not Called	Not Called	Not Called	Not Called	Not Called	Not Called	Not Called	Not Called	Not Called		Not Called	Not Called	Not Called	Not Called	Not Called	Not Called	Not Called
[truncated: 2 more columns]
